# Supplementary material for: Bromide-promoted cascade annulation of isocyanobiaryls with aldehydes through photoredox catalysis
Source: Royal Society of Chemistry journal article supplement (doi:10.1039/d4ob02085e), 2025-01-01

## Supporting Information

# Bromide-promoted cascade annulation of isocyanobiaryls with aldehydes through photoredox catalysis

Mengran Gan, Xiaoting Wu, Xiaochen Ji\* and Huawen Huang\*

|                                                                     |            |
|---------------------------------------------------------------------|------------|
| <b>1. General information .....</b>                                 | <b>S1</b>  |
| <b>2. Procedures for the preparation of 2-isocyanobiaryls .....</b> | <b>S2</b>  |
| <b>3. General procedure for the synthesis of 3a .....</b>           | <b>S5</b>  |
| <b>4. Optimization of the reaction conditions .....</b>             | <b>S6</b>  |
| <b>5. Mechanistic Investigations .....</b>                          | <b>S9</b>  |
| <b>5.1 Radical trapping experiments .....</b>                       | <b>S9</b>  |
| <b>5.2 Stern–Volmer Quenching .....</b>                             | <b>S10</b> |
| <b>5.3 Switched light on/off experiment .....</b>                   | <b>S12</b> |
| <b>5.4 Deuteration experiment .....</b>                             | <b>S13</b> |
| <b>6. Late-stage modification of product 3a.....</b>                | <b>S14</b> |
| <b>7. Characterization data of products .....</b>                   | <b>S17</b> |
| <b>8. Reference .....</b>                                           | <b>S30</b> |
| <b>9. NMR Spectra .....</b>                                         | <b>S31</b> |

## 1. General information

Reactions via general procedure were carried out under argon atmosphere unless otherwise noted. Column chromatography was performed using silica gel (200-300 mesh) or preparative thin layer chromatography was performed using silica gel (GF254).  $^1\text{H}$  NMR and  $^{13}\text{C}$  NMR spectra were recorded on Bruker-AV (400 and 100 MHz, respectively) instrument using  $\text{CDCl}_3$  as solvent. Chemical shift values are reported in  $\delta$  (ppm) relative to  $\text{CDCl}_3$  ( $^1\text{H}$  NMR,  $\delta = 7.26$ ;  $^{13}\text{C}$  NMR,  $\delta = 77.00$ ), respectively. In order to indicate the signal multiplicity, the following abbreviations were used: s (singlet), d (doublet), t (triplet), q (quartet) and m (multiplet) as well as combinations of them. High-resolution mass spectra (ESI) were obtained with the Thermo Scientific LTQ Orbitrap XL mass spectrometer. Melting points were measured with a YUHUA X-5 melting point instrument and were uncorrected. A commercially available blue LED (35W, HIPAR30) was purchased from Shenzhen Jing Feng Times Lighting Technology Co., Ltd as the light source. All irradiation reactions were carried out in a borosilicate glass vessel. The distance from the light source to the irradiation vessel is around 4-5 cm. Unless otherwise noted, all photocatalysts and other reagents were obtained from commercial suppliers and used without further purification.

## 2. Procedures for the preparation of 2-isocyanobiaryls

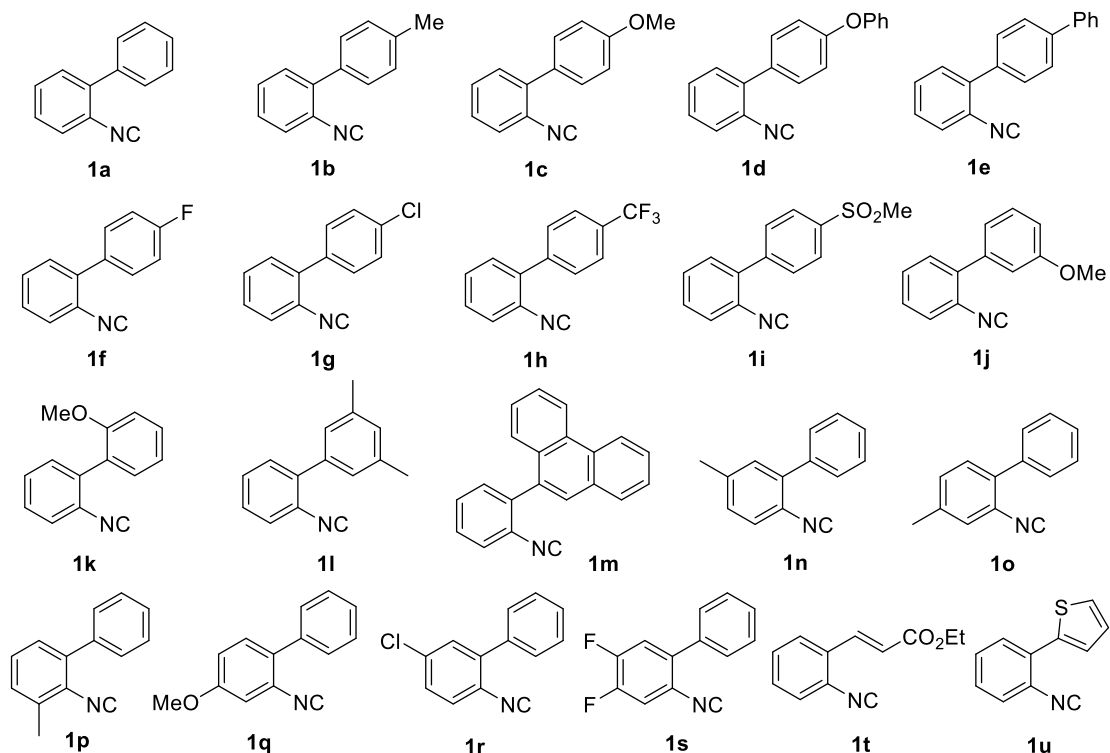

2-Bromoarylamine (10.0 mmol), aryl boronic acid (12.0 mmol),  $K_2CO_3$  (6.2 g, 45.0 mmol) and  $Pd(PPh_3)_2Cl_2$  (140.4 mg, 0.2 mmol) were added to a mixture of EtOH (20 mL) and water (20 mL) at room temperature. The mixture was heated to reflux for 12 h under Ar. After cooled to room temperature, the mixture was extracted with EtOAc. The combined organic layer was washed with brine, dried over anhydrous  $Na_2SO_4$  and concentrated in vacuo. The residue was purified by chromatography on silica gel using petroleum ether/ethyl acetate as eluent to afford 2-aryl aniline.

Then, acetic formic anhydride (18.0 mmol), which was newly prepared from the reaction of acetic anhydride (1.7 mL, 18.0 mmol) with formic acid (0.8 mL, 20.0 mmol) at 55 °C for 2 h, was added dropwise to a mixture of 2-aryl aniline (3.0 mmol) in 6.0 mL THF at 0 °C. After the addition was completed, the mixture was warmed to room temperature and stirred for 4 h. Then, the reaction was quenched with saturated  $NaHCO_3$  and extracted with EtOAc. The combined organic layer was washed with brine, dried over anhydrous  $Na_2SO_4$  and concentrated in vacuo to give the corresponding formamides.

These formamides were used for the subsequent dehydration reaction without further purification.  $POCl_3$  (0.8 mL, 9.0 mmol) was added via syringe pump to a mixture of  $Et_3N$  (3.8 mL, 27.0 mmol) and formamides (3.0 mmol) in THF (6 mL) at 0 °C within 2 hours. After the addition was completed, the resulting mixture was stirred at 0 °C for another 2 hours. Then, the mixture was

quenched with sat.  $\text{NaHCO}_3$  and extracted with  $\text{CH}_2\text{Cl}_2$ . The combined organic layer was washed with brine, dried over anhydrous  $\text{Na}_2\text{SO}_4$  and concentrated in vacuo. The residue was purified by chromatography on silica gel using petroleum ether/ethyl acetate as eluent to afford 2-isocyanobiaryls.

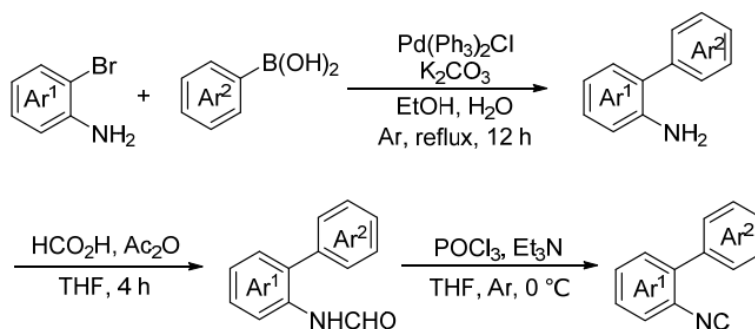

Substrates (**1a-1c**, **1e**, **1g-1h**, **1k**, **1t**)<sup>1</sup>, **1d**<sup>2</sup>, (**1f**, **1i-1j**, **1n-1o**)<sup>3</sup>, (**1l**, **1r**)<sup>4</sup>, (**1m**, **1q**)<sup>5</sup>, **1p**<sup>6</sup>, and **1u**<sup>7</sup> are known compounds, Substrate **1s** is a new compound, and the characterization data and NMR spectra are provided.

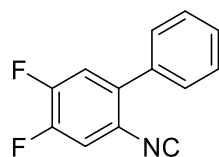

**4,5-difluoro-2-isocyano-1,1'-biphenyl (1s)**: According to the procedure, **1s** was purified by flash column chromatography on silica gel using petroleum ether and ethyl acetate (10:1) as an eluent and obtained in 75% yield (1.6 g). Yellow solid. mp: 88 – 92 °C. <sup>1</sup>H NMR (400 MHz, Chloroform-*d*)  $\delta$  7.54 – 7.43 (m, 5H), 7.35 (dd,  $J$  = 9.6, 7.3 Hz, 1H), 7.26 (dd,  $J$  = 10.4, 8.2 Hz, 1H); <sup>13</sup>C NMR (101 MHz, Chloroform-*d*)  $\delta$  168.0, 150.6 (dd,  $J$  = 255.5, 12.5 Hz), 159.1 (dd,  $J$  = 253.5, 13.9 Hz), 136.5 (dd,  $J$  = 6.4, 4.2 Hz), 135.2, 129.0, 128.9, 120.3 (m), 119.2 (d,  $J$  = 18.9 Hz), 117.2 (d,  $J$  = 20.6 Hz); <sup>19</sup>F NMR (376 MHz, Chloroform-*d*)  $\delta$  -132.69 (d,  $J$  = 21.9 Hz), -135.84 (d,  $J$  = 21.8 Hz). HRMS (ESI)  $m/z$  calcd for  $\text{C}_{13}\text{H}_8\text{NF}_2$  ( $\text{M}+\text{H}$ )<sup>+</sup> 216.0619, found 216.0621.

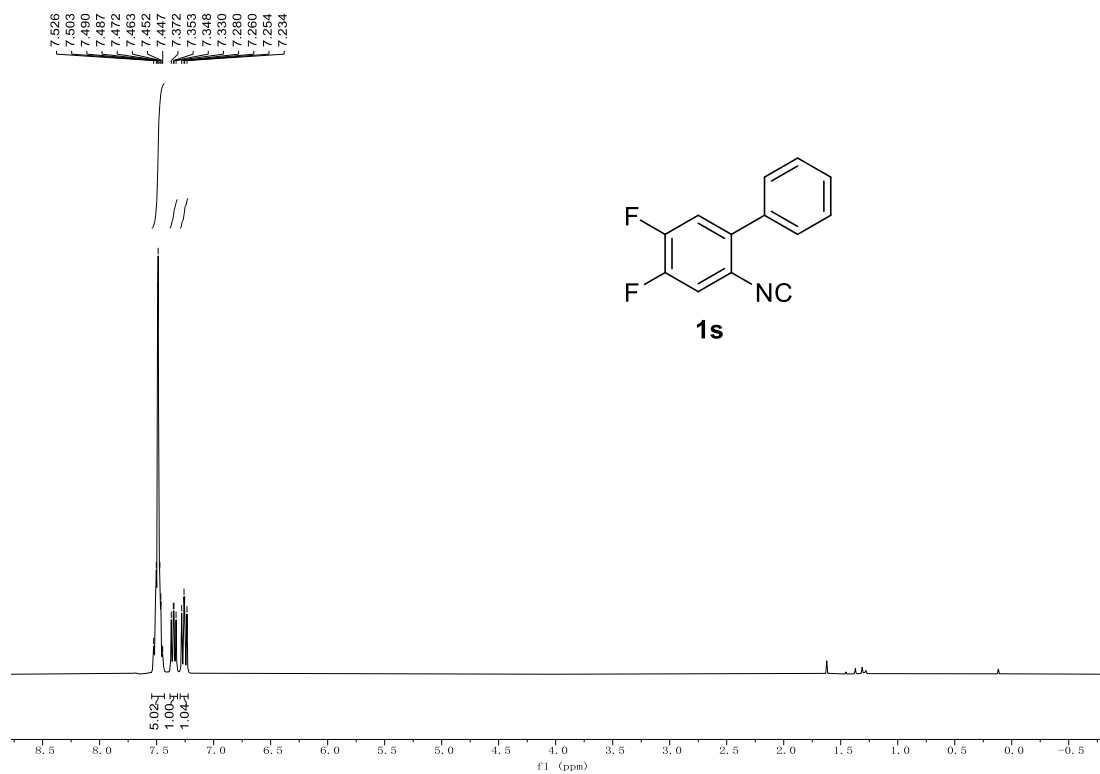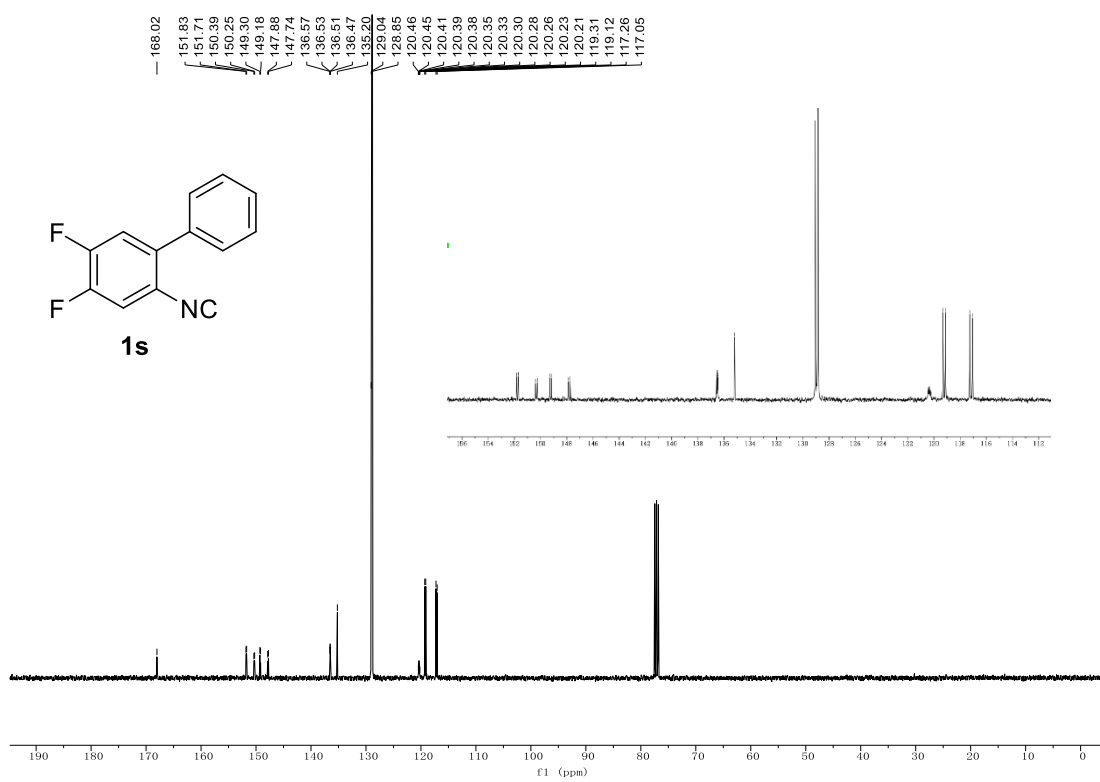

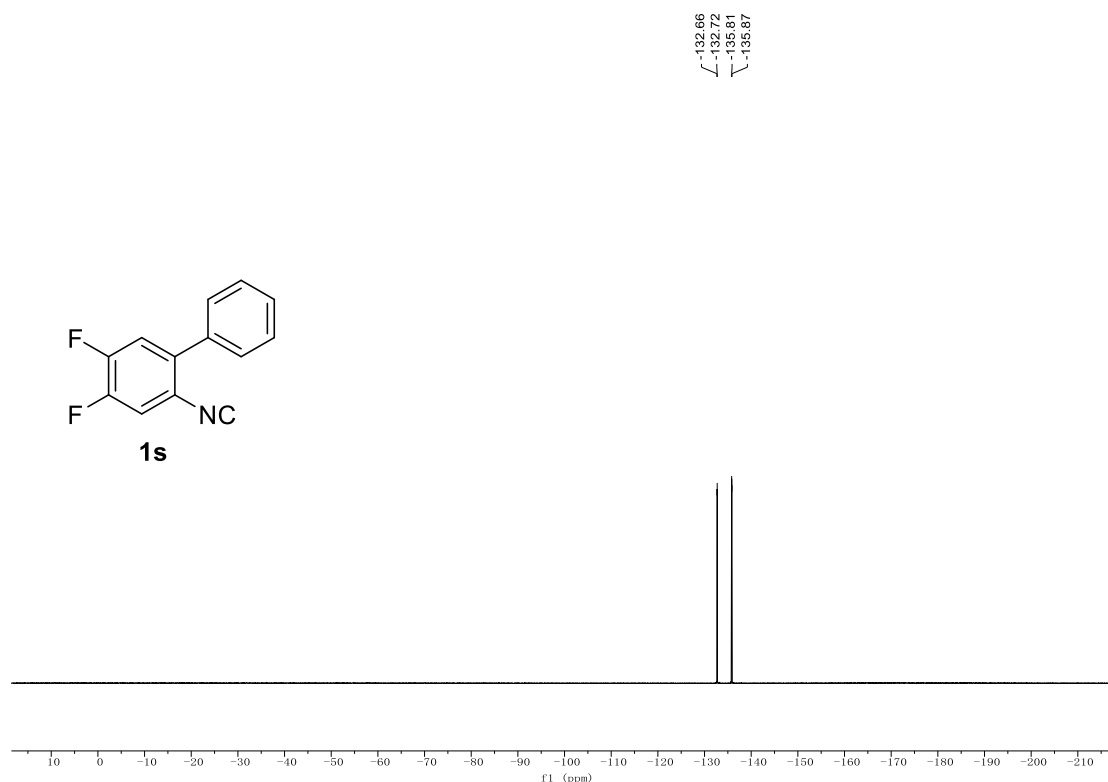

### 3. General procedure for the synthesis of **3a**

**Standard conditions:** A 10 mL reaction vessel was charged with 2-isocyno-1,1'-biphenyl (**1a**, 0.2 mmol, 35.8 mg), phenylpropyl aldehyde (**2a**, 0.4 mmol, 53.1  $\mu$ L),  $\text{NH}_4\text{Br}$  (0.06 mmol, 5.9 mg),  $\text{Ir}[\text{dF}(\text{CF}_3)\text{ppy}]_2(\text{dtbbpy})\text{PF}_6$  (0.002 mmol, 2.3 mg),  $\text{H}_2\text{O}$  (0.2 mmol, 3.6  $\mu$ L), and DCM (3.0 mL). The atmosphere was exchanged by applying vacuum and backfilling with Ar (this process was conducted for three times). The resulting mixture was stirred at 35  $^\circ\text{C}$  for 24 hours under irradiation with a 35 W blue LED. The reaction was monitored by TLC. The crude reaction mixture was quenched with saturated sodium carbonate and extracted with ethyl acetate (3 $\times$ 10 mL). The extracts were combined, dried over sodium sulfate, filtered and the volatiles were removed under reduced pressure. Preparative thin layer chromatography was performed using silica gel (GF254) to give product **3a**.

**Gram-scale experiment:** A 250 mL reaction vessel was charged with 2-isocyno-1,1'-biphenyl (**1a**, 6.0 mmol, 1075 mg), phenylpropyl aldehyde (**2a**, 12.0 mmol, 1.6 mL),  $\text{NH}_4\text{Br}$  (1.8 mmol, 177 mg),  $\text{Ir}[\text{dF}(\text{CF}_3)\text{ppy}]_2(\text{dtbbpy})\text{PF}_6$  (0.06 mmol, 69 mg),  $\text{H}_2\text{O}$  (6.0 mmol, 108  $\mu$ L), and DCM (60 mL). The atmosphere was exchanged by applying vacuum and backfilling with Ar (this process was conducted for three times). The resulting mixture was stirred at 35  $^\circ\text{C}$  for 24 hours under irradiation

with two 35 W blue LEDs. The crude reaction mixture was quenched with saturated sodium carbonate and extracted with acetate (3 × 20 mL). The extracts were combined, dried over sodium sulfate, filtered and the volatiles were removed under reduced pressure. The reaction yields were quantified by separation, and column chromatography was performed using silica gel (200-300 mesh) to give product **3a**, 1.03 g, 55% yield.

#### 4. Optimization of the reaction conditions

**Table 1.** The effect of additive on this reaction

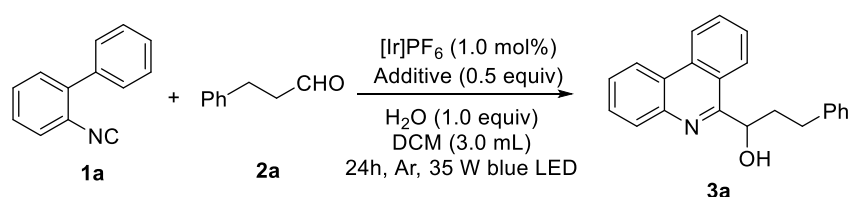

| Entry           | Additive               | Yield of <b>3a</b> (%) |
|-----------------|------------------------|------------------------|
| 1               | NaBr                   | 44                     |
| 2               | $\text{NH}_4\text{Br}$ | 53                     |
| 3               | LiCl                   | 7                      |
| 4               | LiBr                   | 48                     |
| 5               | KI                     | trace                  |
| 6               | NiCl                   | trace                  |
| 7               | NaI                    | nd                     |
| 8               | KBr                    | 45                     |
| 9 <sup>b</sup>  | $\text{NH}_4\text{Br}$ | 58                     |
| 10 <sup>b</sup> | TBABr                  | 44                     |
| 11 <sup>c</sup> | TBABr                  | 50                     |

<sup>a</sup> Reaction conditions: **1a** (0.2 mmol), **2a** (0.4 mmol),  $[\text{Ir}]\text{PF}_6$  (1 mol %), additive (0.5 equiv),  $\text{H}_2\text{O}$  (1 equiv), DCM (3 mL), Ar, 35 W blue LED, 35 °C, 24 h. <sup>b</sup> Isolated yield. <sup>c</sup> In the absence of  $\text{H}_2\text{O}$ .

**Table 2.** The effect of photocatalyst on this reaction

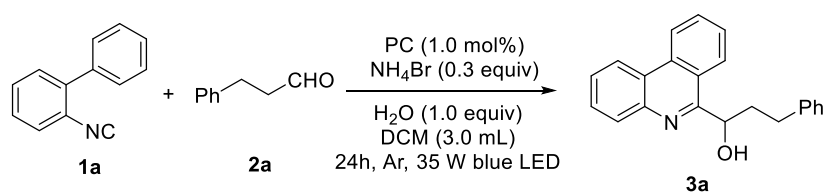

| Entry | PC          | Yield of <b>3a</b> (%) <sup>b</sup> |
|-------|-------------|-------------------------------------|
| 1     | 4CzIPN      | 36                                  |
| 2     | Rose Bengal | 34                                  |

|   |                                                                  |       |
|---|------------------------------------------------------------------|-------|
| 3 | [Ru(bpy) <sub>3</sub> ](PF <sub>6</sub> ) <sub>2</sub>           | trace |
| 4 | 9-Fluorenone                                                     | 19    |
| 5 | Eosin B                                                          | trace |
| 6 | Ir(ppy) <sub>3</sub>                                             | trace |
| 7 | Ir[dF(Me)ppy] <sub>2</sub> (dtbbpy)PF <sub>6</sub>               | 14    |
| 8 | Ir[dF(CF <sub>3</sub> )ppy] <sub>2</sub> (dtbbpy)PF <sub>6</sub> | 57    |
| 9 | Eosin Y                                                          | trace |

<sup>a</sup> Reaction conditions: **1a** (0.2 mmol), **2a** (0.4 mmol), PC (1 mol %), NH<sub>4</sub>Br (0.3 equiv), H<sub>2</sub>O (1 equiv), DCM (3 mL), Ar, 35 W blue LED, 35 °C, 24 h. <sup>b</sup> Isolated yield.

**Table 3.** The effect of solvent on this reaction

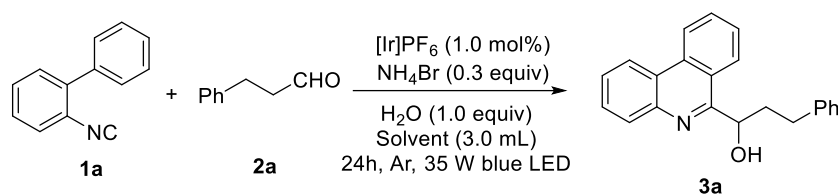

| Entry | Solvent           | Yield of <b>3a</b> (%) <sup>b</sup> |
|-------|-------------------|-------------------------------------|
| 1     | DCM               | 58                                  |
| 2     | MeCN              | trace                               |
| 3     | PhCl              | 53                                  |
| 4     | EA                | 50                                  |
| 5     | Acetone           | 25                                  |
| 6     | DCE               | 50                                  |
| 7     | THF               | 16                                  |
| 8     | toluene           | 20                                  |
| 9     | PhBr              | 39                                  |
| 10    | EtOH              | 18                                  |
| 11    | DMF               | trace                               |
| 12    | Et <sub>2</sub> O | 22                                  |
| 13    | DMSO              | trace                               |
| 14    | Cyclohexane       | 19                                  |
| 15    | CHCl <sub>3</sub> | 21                                  |

<sup>a</sup> Reaction conditions: **1a** (0.2 mmol), **2a** (0.4 mmol), [Ir]PF<sub>6</sub> (1 mol %), NH<sub>4</sub>Br (0.3 equiv), H<sub>2</sub>O (1 equiv), solvent (3 mL), Ar, 35 W blue LED, 35 °C, 24 h. <sup>b</sup> Isolated yield.

**Table 4.** The effect of H<sub>2</sub>O on this reaction

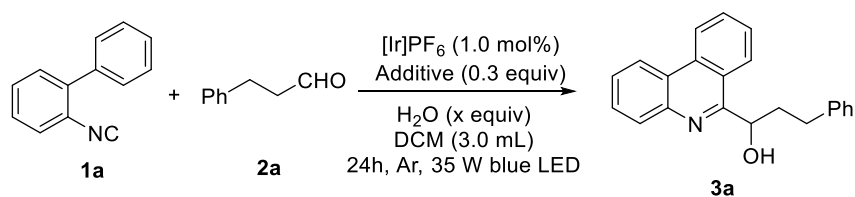



| Entry | H <sub>2</sub> O | Yield of <b>3a</b> (%) <sup>b</sup> |
|-------|------------------|-------------------------------------|
| 1     | 0                | 50                                  |
| 2     | 0.5              | 51                                  |
| 3     | 1                | 58                                  |
| 4     | 2                | 53                                  |
| 5     | 10               | 42                                  |

<sup>a</sup> Reaction conditions: **1a** (0.2 mmol), **2a** (0.4 mmol), [Ir]PF<sub>6</sub> (1 mol %), NH<sub>4</sub>Br (0.3 equiv), H<sub>2</sub>O (x equiv), DCM (3 mL), Ar, 35 W blue LED, 35 °C, 24 h. <sup>b</sup> Isolated yield.

**Table 5.** The effect of NH<sub>4</sub>Br on this reaction

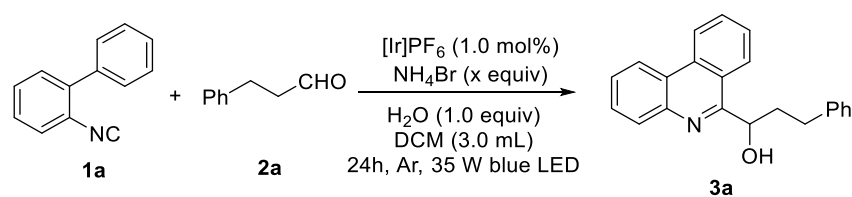

| Entry | NH <sub>4</sub> Br | Yield of <b>3a</b> (%) <sup>b</sup> |
|-------|--------------------|-------------------------------------|
| 1     | 0                  | 32                                  |
| 2     | 0.1                | 50                                  |
| 3     | 0.3                | 58                                  |
| 4     | 0.5                | 55                                  |
| 5     | 0.7                | 55                                  |
| 6     | 1                  | 50                                  |

<sup>a</sup> Reaction conditions: **1a** (0.2 mmol), **2a** (0.4 mmol), [Ir]PF<sub>6</sub> (1 mol %), NH<sub>4</sub>Br (x equiv), H<sub>2</sub>O (1 equiv), DCM (3 mL), Ar, 35 W blue LED, 35 °C, 24 h. <sup>b</sup> Isolated yield.

**Table 6.** The effect of feed ratio on this reaction

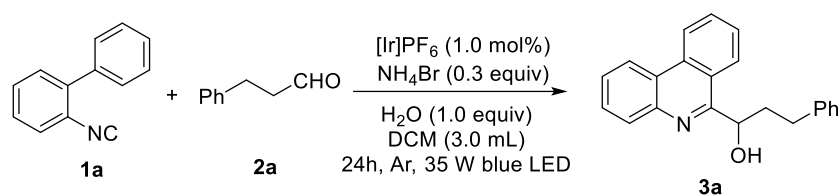

| Entry | <b>1a:2a</b> | Yield of <b>3a</b> (%) <sup>b</sup> |
|-------|--------------|-------------------------------------|
| 1     | 1:3          | 50                                  |
| 2     | 1:2          | 58                                  |
| 3     | 1:1          | 38                                  |
| 4     | 2:1          | 30                                  |

<sup>a</sup> Reaction conditions: [Ir]PF<sub>6</sub> (1 mol %), NH<sub>4</sub>Br (0.3 equiv), H<sub>2</sub>O (1 equiv), solvent (3 mL), Ar, 35 W blue LED, 35 °C, 24 h. <sup>b</sup> Isolated yield.

**Table 7.** Control experiments

| Entry | variation of standard condition                                          | Yield of <b>3a</b> (%) <sup>b</sup> |
|-------|--------------------------------------------------------------------------|-------------------------------------|
| 1     | none                                                                     | 58                                  |
| 2     | without Ir[dF(CF <sub>3</sub> )ppy] <sub>2</sub> (dtbbpy)PF <sub>6</sub> | 0                                   |
| 3     | without NH <sub>4</sub> Br                                               | trace                               |
| 4     | In dark                                                                  | trace                               |

<sup>a</sup> Reaction conditions: **1a** (0.2 mmol), **2a** (0.4 mmol), [Ir]PF<sub>6</sub> (1 mol %), NH<sub>4</sub>Br (0.3 equiv), H<sub>2</sub>O (1 equiv), DCM (3 mL), Ar, 35 W blue LED, 35 °C, 24 h. <sup>b</sup> Isolated yield.

## 5. Mechanistic Investigations

### 5.1. Radical trapping experiments

The following reaction was carried out under standard condition: A 10 mL reaction vessel was charged with 2-isocyano-1,1'-biphenyl (**1a**, 0.2 mmol, 35.8 mg), phenylpropyl aldehyde (**2a**, 0.4 mmol, 53.1 μL), NH<sub>4</sub>Br (0.06 mmol, 5.9 mg), Ir[dF(CF<sub>3</sub>)ppy]<sub>2</sub>(dtbbpy)PF<sub>6</sub> (0.002 mmol, 2.3 mg), H<sub>2</sub>O (0.2 mmol, 3.6 μL), 2,2,6,6-tetramethyl-1-piperidinyloxy (TEMPO) (0.4 mmol, 2.0 equiv, 62.8 mg) and DCM (3.0 mL). The atmosphere was exchanged by applying vacuum and backfilling with Ar (this process was conducted for three times). The resulting mixture was stirred at 35 °C for 24 hours under irradiation with a 35 W blue LED. The formation of **3a** was suppressed. Meanwhile, the TEMPO-trapped product (**4**) was detected by HR-MS.

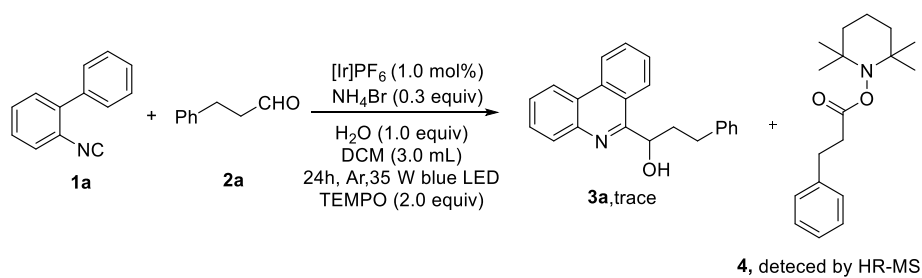

HRMS (ESI): *m/z* calcd for C<sub>18</sub>H<sub>27</sub>NNaO<sub>2</sub> (M+Na)<sup>+</sup> 312.1934, found 312.1965.

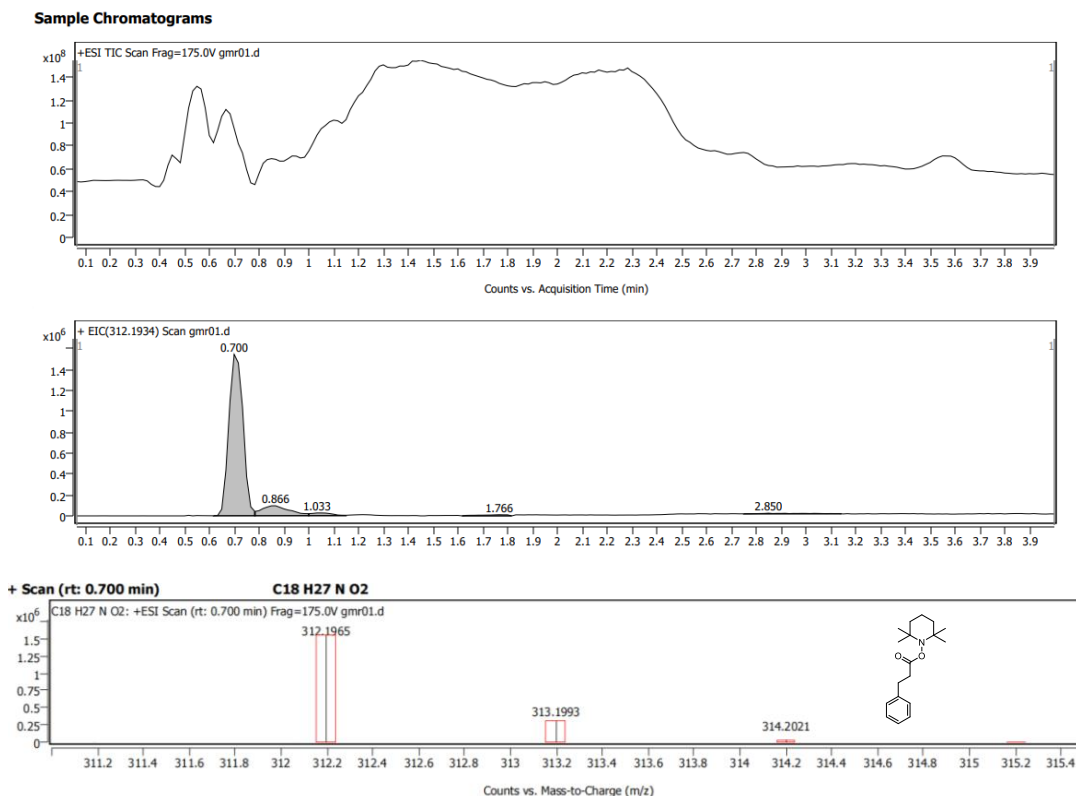

2-isocyano-1,1'-biphenyl (**1a**, 0.2 mmol, 35.8 mg), phenylpropyl aldehyde (**2a**, 0.4 mmol, 53.1  $\mu$ L),  $\text{NH}_4\text{Br}$  (0.06 mmol, 5.9 mg),  $\text{Ir}[\text{dF}(\text{CF}_3)\text{ppy}]_2(\text{dtbbpy})\text{PF}_6$  (0.002 mmol, 2.3 mg),  $\text{H}_2\text{O}$  (0.2 mmol, 3.6  $\mu$ L), butylated hydroxytoluene (BHT) (0.4 mmol, 2.0 equiv, 88.2 mg) or 1,1-Diphenylethylene (DPE) (0.4 mmol, 2.0 equiv, 72  $\mu$ L), and DCM (3.0 mL) were placed in a 10 mL reaction tube. The reaction mixture was stirred under air using a 35 W blue LED for 24 h. The formation of **3a** was suppressed.

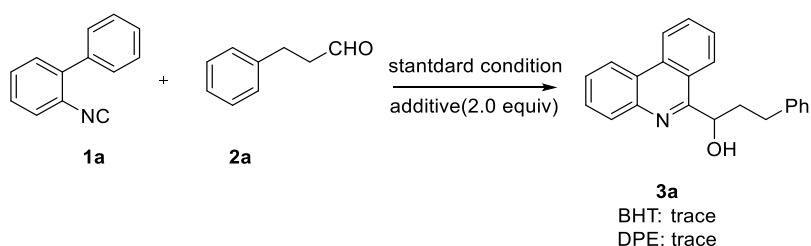

## 5.2. Stern–Volmer Quenching

**Formulation solution:** 2-isocyano-1,1'-biphenyl (2.5 mmol, 447.5 mg) was dissolved in DCM in a 25 mL volumetric flask to set the concentration to be 0.1 M. Phenylpropyl aldehyde (2.5 mmol, 332  $\mu$ L) was dissolved in DCM in a 25 mL volumetric flask to set the concentration to be 0.1 M.  $\text{NH}_4\text{Br}$  (1.25 mmol, 122.9 mg) was dissolved in acetone in a 25 mL volumetric flask to set the concentration

to be 0.05 M (acetone was used as solvent for  $\text{NH}_4\text{Br}$  due to its' poor solubility in DCM). TBABr (1.25 mmol, 80.6 mg) was dissolved in DCM in a 25 mL volumetric flask to set the concentration to be 0.01 M.  $\text{Ir}[\text{dF}(\text{CF}_3)\text{ppy}]_2(\text{dtbbpy})\text{PF}_6$  (0.0025 mol, 2.8 mg) was dissolved in DCM (25.0 mL) to set the concentration to be 0.1 mM.

**Experimental procedure:** The resulting 0.1 mM  $\text{Ir}[\text{dF}(\text{CF}_3)\text{ppy}]_2(\text{dtbbpy})\text{PF}_6$  solution (50  $\mu\text{L}$ ) was added to a cuvette, which was then diluted to a volume of 2.0 mL by adding further solvent (DCM) to prepare a 2.5  $\mu\text{M}$  solution. 10.0  $\mu\text{L}$  of 2-isocyano-1,1'-biphenyl (**1a**) was successively added, uniformly stirred and the resulting mixture was bubbled with nitrogen for 3 minutes and irradiated at 420 nm. Fluorescence emission spectra of 0  $\mu\text{L}$ , 10.0  $\mu\text{L}$ , 20.0  $\mu\text{L}$ , 30.0  $\mu\text{L}$ , 40.0  $\mu\text{L}$ , 50.0  $\mu\text{L}$  fluorescence intensity. Follow this method and make changes to the amount of other compound to obtain the Stern–Volmer relationship in turn.

(a) Fluorescence of  $\text{Ir}[\text{dF}(\text{CF}_3)\text{ppy}]_2(\text{dtbbpy})\text{PF}_6$  quenched by 2-isocyano-1,1'-biphenyl (**1a**).

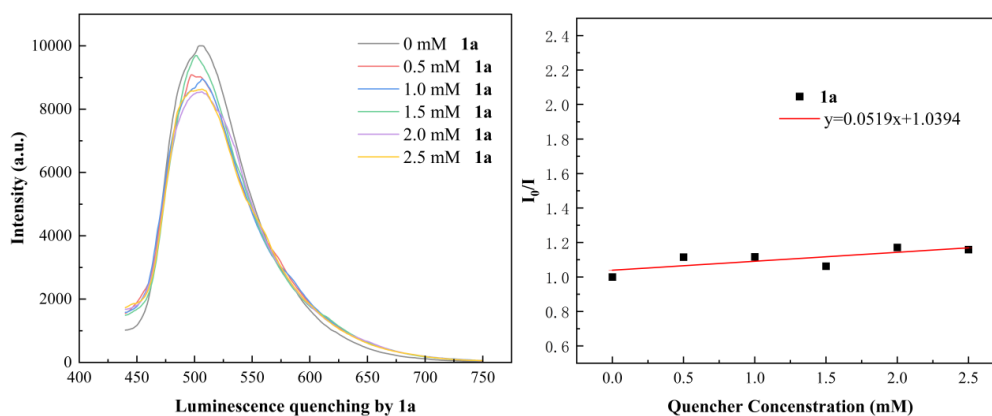

(b) Fluorescence of  $\text{Ir}[\text{dF}(\text{CF}_3)\text{ppy}]_2(\text{dtbbpy})\text{PF}_6$  quenched by phenylpropyl aldehyde (**2a**).

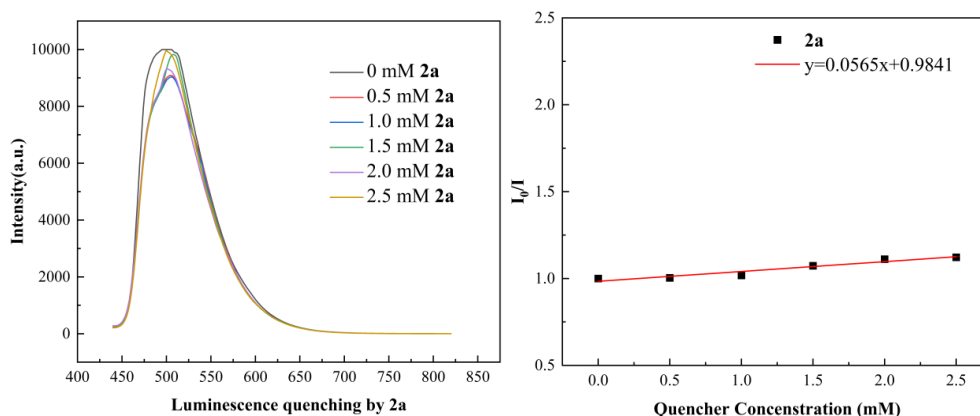

(c) Fluorescence of Ir[dF(CF<sub>3</sub>)ppy]<sub>2</sub>(dtbbpy)PF<sub>6</sub> quenched by NH<sub>4</sub>Br in acetone.

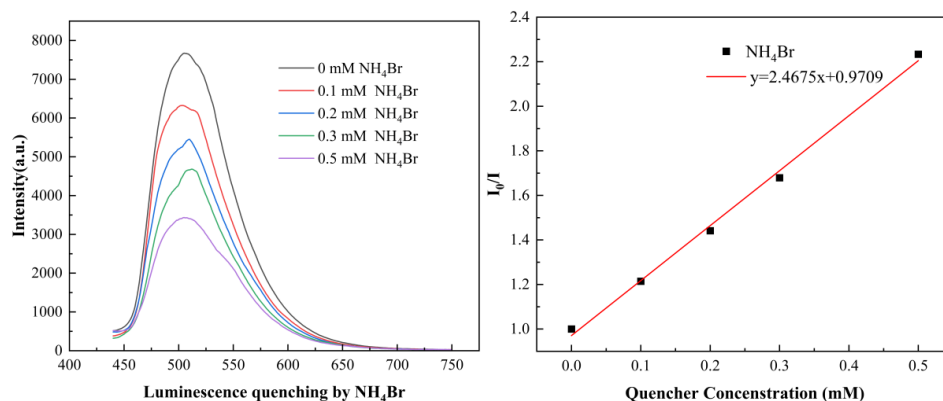

(d) Fluorescence of Ir[dF(CF<sub>3</sub>)ppy]<sub>2</sub>(dtbbpy)PF<sub>6</sub> quenched by TBABr in DCM.

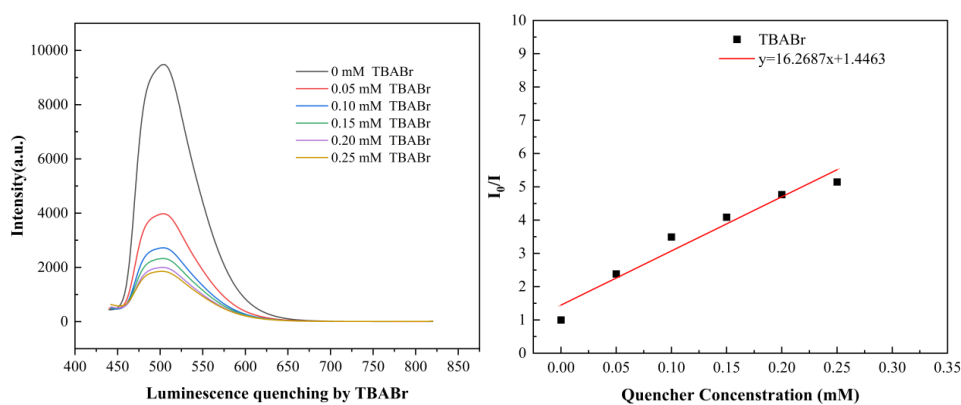

(e) Stern-Volmer plots of Ir[dF(CF<sub>3</sub>)ppy]<sub>2</sub>(dtbbpy)PF<sub>6</sub>.

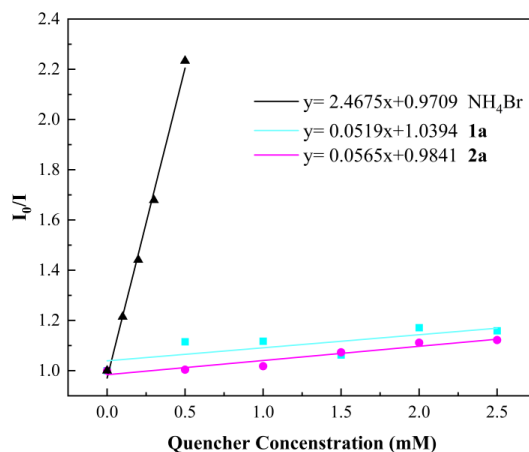

### 5.3 Switched light on/off experiment

Six 10 ml reaction vessels, numbered 1, 2, 3, 4, 5, 6, were charged with 2-isocyano-1,1'-biphenyl (**1a**, 0.2 mmol, 35.8 mg), phenylpropyl aldehyde (**2a**, 0.4 mmol, 53.1  $\mu$ L), NH<sub>4</sub>Br (0.06

mmol, 5.9 mg), Ir[dF(CF<sub>3</sub>)ppy]<sub>2</sub>(dtbbpy)PF<sub>6</sub> (0.002 mmol, 2.3 mg), H<sub>2</sub>O (0.2 mmol, 3.6 μL), and DCM (3.0 mL) respectively. The atmosphere was exchanged by applying vacuum and backfilling with Ar (this process was conducted for three times). The mixture was stirring at 35 °C for sequential periods (2 hours) under irradiation with a 35 W blue LED and followed by stirring in the dark for 2 hours, and so on. At each time point, one reaction vessel was taken out, and the isolated yield of **3a** was obtained. As shown in the figure, continuous light irradiation was essential for the process.

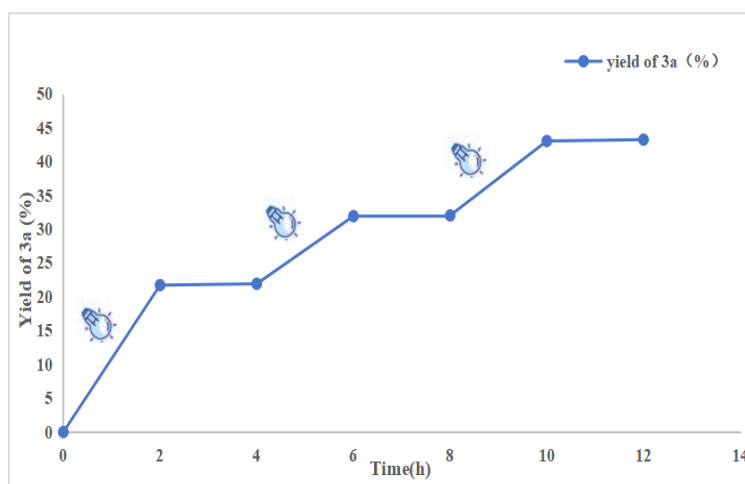

#### 5.4 Deuteration experiment

Using D<sub>2</sub>O under standard condition

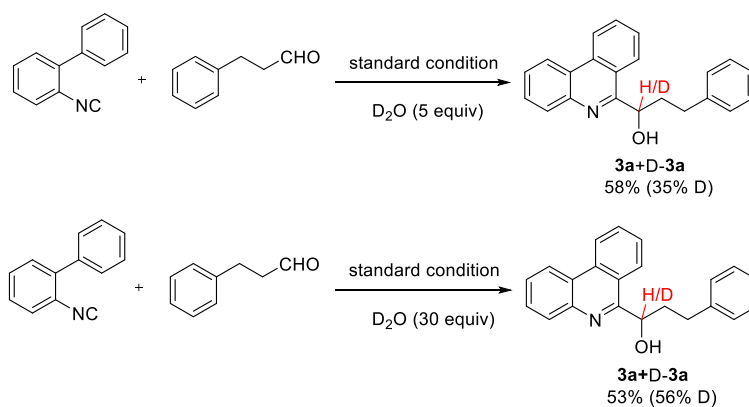

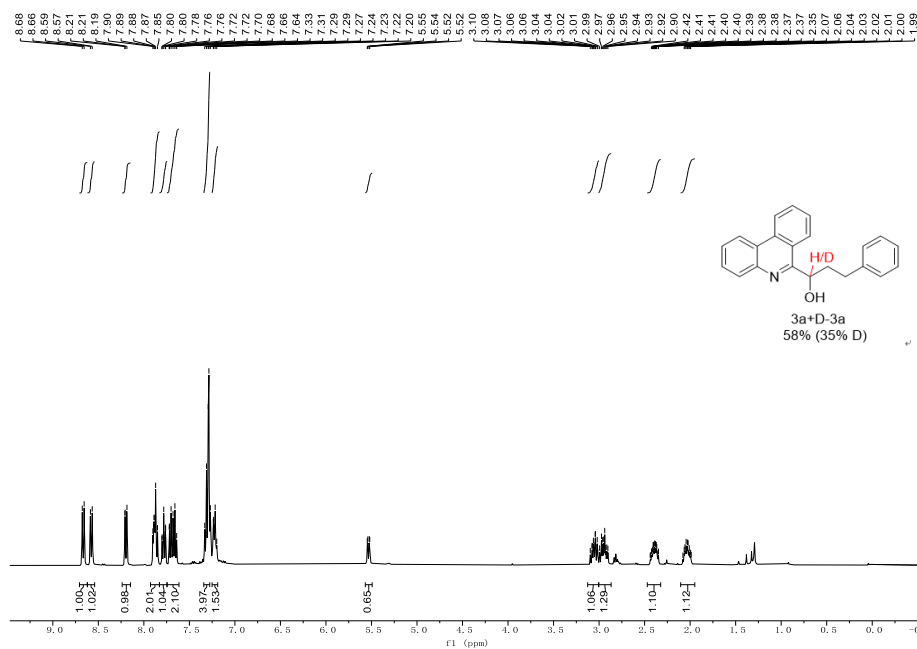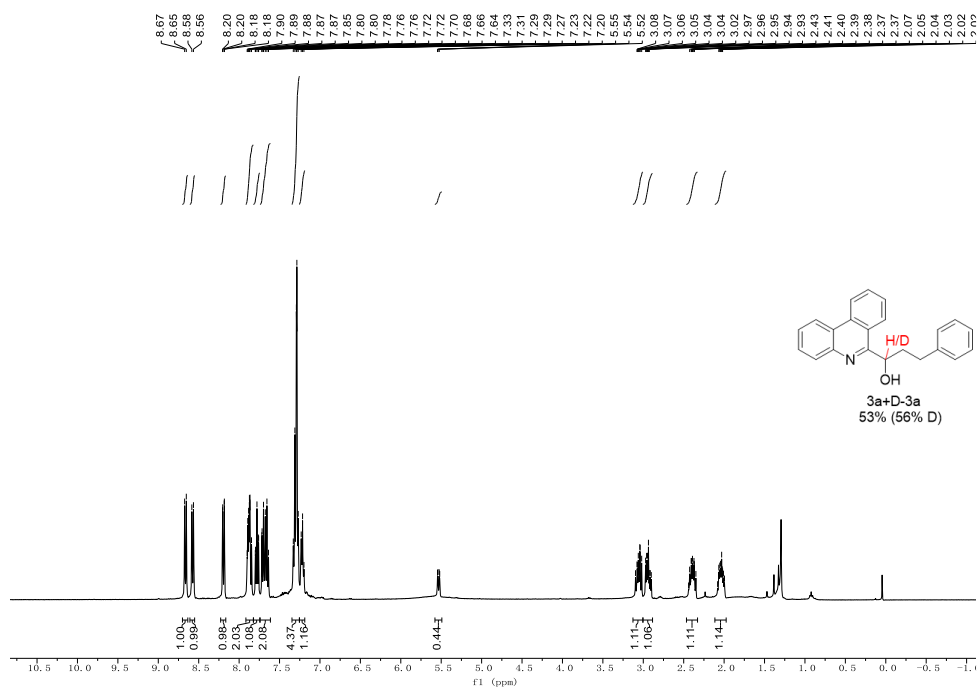

## 6. Late-stage modification of product 3a

### 6.1 Oxidation

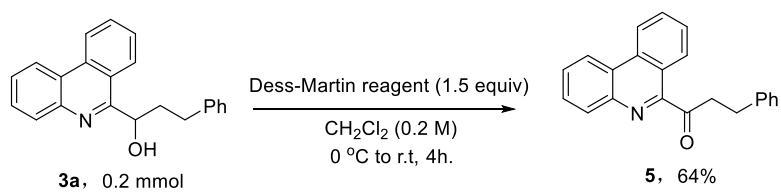

To a 10 mL reaction vessel was charged successively with **3a** (0.2 mmol, 62.2 mg), Dess-Martin reagent (0.3 mmol, 127.3 mg) and CH<sub>2</sub>Cl<sub>2</sub> (0.2 M) at 0 °C. The reaction mixture was stirred at room temperature for 4 h. The reaction was monitored by TLC. The crude reaction mixture was quenched with NaHCO<sub>3</sub> (aq, 10%, 5 mL). Then the mixture was extracted with ethyl acetate for three times (3×10 mL). The organic solution was dried over sodium sulfate, and filtered. The crude material was purified by silica gel to deliver the product **5** (39.8 mg, 64%).

**1-(phenanthridin-6-yl)-3-phenylpropan-1-one (5)**<sup>8</sup>: yellow oil. <sup>1</sup>H NMR (400 MHz, Chloroform-*d*) δ 8.82 (d, *J* = 8.2 Hz, 1H), 8.67 (d, *J* = 8.3 Hz, 1H), 8.65 – 8.57 (m, 1H), 8.27 – 8.21 (m, 1H), 7.93 – 7.85 (m, 1H), 7.85 – 7.69 (m, 3H), 7.36 (d, *J* = 6.8 Hz, 4H), 7.30 – 7.21 (m, 1H), 3.85 – 3.78 (m, 2H), 3.22 (t, *J* = 7.7 Hz, 2H); <sup>13</sup>C NMR (101 MHz, Chloroform-*d*) δ 203.8, 154.1, 142.5, 141.4, 133.5, 131.0, 130.8, 129.0, 128.8, 128.6, 128.5, 128.1, 127.8, 126.1, 125.3, 123.1, 122.1, 122.1, 42.0, 30.2.

## 6.2 Allylation

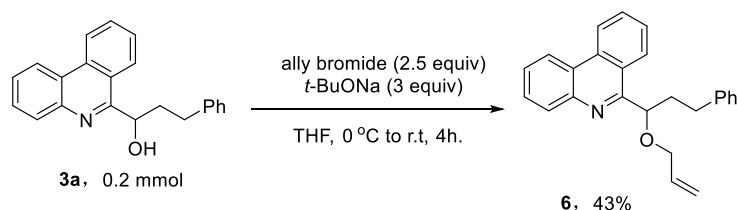

To a solution of **3a** (0.2 mmol, 62.2 mg) and allyl bromide (0.5 mmol, 43 μL) in THF (2 mL) at 0 °C was added t-BuONa (0.6 mmol, 58 mg) and the mixture was vigorously stirred at room temperature. After 4 hours the reaction was quenched with water (3.0 mL) and diluted with EtOAc (5.0 mL). The aqueous phase was extracted with EtOAc (3×5 mL). Combined organic extracts were washed with water (3.0 mL), brine, dried over MgSO<sub>4</sub> and concentrated. The diene product **6** was purified by short column chromatography.

**6-(1-(allyloxy)-3-phenylpropyl)phenanthridine (6)**: yellow oil. <sup>1</sup>H NMR (400 MHz, Chloroform-*d*) δ 8.78 (d, *J* = 8.3 Hz, 1H), 8.69 (d, *J* = 8.3 Hz, 1H), 8.60 (d, *J* = 8.1 Hz, 1H), 8.25 (d, *J* = 8.1 Hz, 1H), 7.87 (t, *J* = 7.6 Hz, 1H), 7.78 (t, *J* = 7.5 Hz, 1H), 7.69 (q, *J* = 7.6 Hz, 2H), 7.29 (dt, *J* = 13.3, 7.3 Hz, 5H), 7.21 (t, *J* = 7.0 Hz, 1H), 5.99 (ddt, *J* = 16.1, 10.7, 5.6 Hz, 1H), 5.36 – 5.24 (m, 1H), 5.18 (dt, *J* = 8.3, 4.1 Hz, 2H), 4.14 – 3.95 (m, 2H), 3.05 (ddd, *J* = 14.5, 10.1, 5.1 Hz, 1H), 2.91 – 2.76 (m, 1H), 2.60 (dtd, *J* = 14.3, 9.4, 5.2 Hz, 1H), 2.46 – 2.28 (m, 1H); <sup>13</sup>C NMR (101 MHz, CDCl<sub>3</sub>) δ 160.7, 143.3, 141.8, 134.8, 133.4, 130.6, 130.1, 128.7, 128.6, 128.4, 127.2, 127.1, 126.7, 125.9,



124.4, 124.1, 122.5, 122.0, 117.0, 84.0, 70.4, 37.6, 32.7. HRMS (ESI)  $m/z$  calcd for  $C_{25}H_{24}NO$  ( $M+H$ )<sup>+</sup> 354.1852, found 354.1849.

### 6.3 Bromination and Chlorination

**Bromination:** To a 10 mL reaction vessel was charged successively with **3a** (0.2 mmol, 62.2 mg),  $CBr_4$  (0.3 mmol, 99.5 mg),  $CH_2Cl_2$  (1.0 mL), and  $PPh_3$  (1.2 equiv, 62.9 mg) in an ice bath. After the reaction mixture was stirred for 4 h at room temperature, the reaction solution was concentrated under reduced pressure. The residue was purified by silica gel flash column chromatography to give the corresponding compound **7** (39.2 mg, 54% yield).

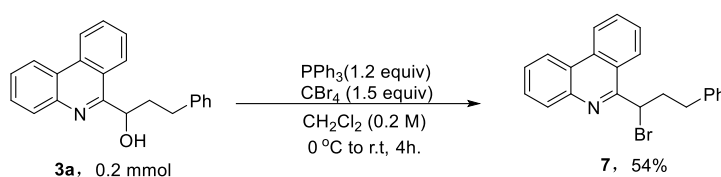

**6-(1-bromo-3-phenylpropyl)phenanthridine (7):** white solid. mp: 149 – 151 °C.  $^1H$  NMR (400 MHz, Chloroform-*d*)  $\delta$  8.71 (d,  $J = 8.3$  Hz, 1H), 8.60 (d,  $J = 7.8$  Hz, 1H), 8.31 (d,  $J = 8.2$  Hz, 1H), 8.28 – 8.22 (m, 1H), 7.92 – 7.84 (m, 1H), 7.83 – 7.69 (m, 3H), 7.40 – 7.27 (m, 5H), 5.83 (t,  $J = 6.9$  Hz, 1H), 3.15 – 3.05 (m, 2H), 2.99 (ddd,  $J = 20.9, 7.6, 5.6$  Hz, 2H);  $^{13}C$  NMR (101 MHz,  $CDCl_3$ )  $\delta$  157.5, 143.4, 141.1, 133.5, 130.6, 130.5, 128.8, 128.7, 128.6, 127.6, 127.4, 126.2, 125.5, 124.1, 124.1, 122.7, 122.0, 49.5, 37.5, 34.2. HRMS (ESI)  $m/z$  calcd for  $C_{22}H_{19}NBr$  ( $M+H$ )<sup>+</sup> 376.0695, found 376.0688.

**Chlorination:** To a stirred solution of **3a** (0.2 mmol, 62.2 mg) and  $PPh_3$  (0.4 mmol, 104.8 mg) in dry  $CH_2Cl_2$  (0.5 mL) was added  $Cl_3CCONH_2$  (0.4 mmol, 64.8 mg) at room temperature under an  $N_2$  atmosphere. After reaction completion (TLC), the reaction was quenched with cold water and extracted with dichloromethane. The combined organic layer was washed with brine, dried over anhydrous  $MgSO_4$  and filtered. The filtrate was concentrated in vacuum. Purification by silica-gel chromatography (hexane/ $AcOEt = 60/1$ ) gave the corresponding product **8** (30.0 mg, 45% yield).

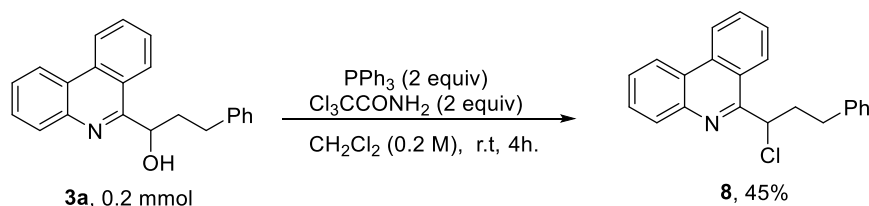

**6-(1-chloro-3-phenylpropyl)phenanthridine (8):** yellow oil.  $^1H$  NMR (400 MHz, Chloroform-*d*)  $\delta$  8.67 (d,  $J = 8.3$  Hz, 1H), 8.57 (d,  $J = 8.0$  Hz, 1H), 8.28 (d,  $J = 8.3$  Hz, 1H), 8.21 (d,  $J = 8.0$  Hz,

1H), 7.85 (t,  $J = 7.6$  Hz, 1H), 7.80 – 7.66 (m, 3H), 7.28 (tq,  $J = 16.1, 7.3$  Hz, 5H), 5.72 (t,  $J = 6.5$  Hz, 1H), 3.01 (q,  $J = 5.7, 4.0$  Hz, 1H), 2.95 (ddd,  $J = 8.7, 6.9, 4.2$  Hz, 3H);  $^{13}\text{C}$  NMR (101 MHz,  $\text{CDCl}_3$ )  $\delta$  157.2, 143.2, 141.1, 133.5, 130.6, 130.6, 128.8, 128.7, 128.5, 127.6, 127.4, 126.2, 125.6, 124.2, 124.1, 122.7, 122.0, 58.4, 37.3, 33.2. HRMS (ESI)  $m/z$  calcd for  $\text{C}_{22}\text{H}_{19}\text{NCl}$  ( $\text{M}+\text{H}$ ) $^+$  322.1201, found 322.1196.

## 7. Characterization data of products

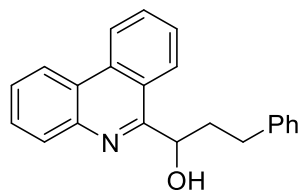

**1-(phenanthridin-6-yl)-3-phenylpropan-1-ol (3a)**<sup>9</sup>: yellow oil. Purification by preparative thin layer chromatography was performed (PE/EA: 10/1) to yield **3a** (36.4 mg, 58%) as a yellow oil;  $^1\text{H}$  NMR (400 MHz, Chloroform- $d$ )  $\delta$  8.65 (d,  $J = 8.3$  Hz, 1H), 8.56 (d,  $J = 8.0$  Hz, 1H), 8.24 – 8.10 (m, 1H), 7.95 – 7.81 (m, 2H), 7.81 – 7.71 (m, 1H), 7.72 – 7.58 (m, 2H), 7.31 – 7.22 (m, 4H), 7.18 (ddd,  $J = 6.8, 3.9, 1.9$  Hz, 1H), 5.60 (s, 1H), 5.50 (d,  $J = 8.4$  Hz, 1H), 3.09 – 2.97 (m, 1H), 2.90 (ddd,  $J = 13.9, 9.5, 4.8$  Hz, 1H), 2.43 – 2.31 (m, 1H), 2.00 (dtd,  $J = 13.8, 9.0, 4.8$  Hz, 1H);  $^{13}\text{C}$  NMR (101 MHz, Chloroform- $d$ )  $\delta$  161.1, 142.1, 141.9, 133.3, 130.8, 129.5, 128.9, 128.7, 128.4, 127.4, 127.0, 125.9, 125.0, 124.2, 123.1, 122.8, 122.1, 68.8, 40.8, 32.0.

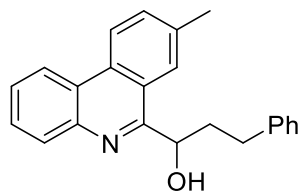

**1-(8-methylphenanthridin-6-yl)-3-phenylpropan-1-ol (3b)**<sup>9</sup>: yellow oil. Purification by preparative thin layer chromatography was performed (PE/EA: 10/1) to yield **3b** (30.8 mg, 47%) as a yellow oil;  $^1\text{H}$  NMR (400 MHz, Chloroform- $d$ )  $\delta$  8.50 (d,  $J = 8.3$  Hz, 2H), 8.14 (d,  $J = 9.1$  Hz, 1H), 7.76 – 7.68 (m, 1H), 7.64 (d,  $J = 13.6$  Hz, 2H), 7.49 (s, 1H), 7.32 (d,  $J = 6.5$  Hz, 4H), 7.23 (t,  $J = 7.5$  Hz, 1H), 5.58 (s, 1H), 5.45 (s, 1H), 3.06 (dt,  $J = 13.8, 8.3$  Hz, 1H), 2.92 (ddd,  $J = 13.6, 8.4, 4.8$  Hz, 1H), 2.49 (s, 3H), 2.44 – 2.26 (m, 1H), 1.99 (ddt,  $J = 17.0, 8.4, 4.8$  Hz, 1H);  $^{13}\text{C}$  NMR (101 MHz, Chloroform- $d$ )  $\delta$  160.8, 142.0, 141.7, 137.4, 132.6, 131.1, 129.3, 128.9, 128.5, 128.4, 126.9, 126.0, 124.5, 124.3, 123.1, 122.6, 121.9, 68.4, 40.8, 32.0, 21.8.

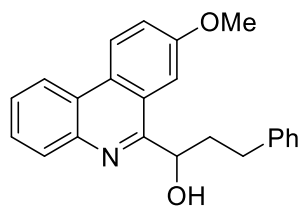

**1-(8-methoxyphenanthridin-6-yl)-3-phenylpropan-1-ol (3c):** yellow oil. Purification by preparative thin layer chromatography was performed (PE/Ea: 10/1) to yield **3c** (37.7mg, 55%) as a yellow oil;  $^1\text{H NMR}$  (400 MHz, Chloroform-*d*)  $\delta$  8.46 (d,  $J = 9.1$  Hz, 1H), 8.40 (d,  $J = 7.7$  Hz, 1H), 8.15 – 8.09 (m, 1H), 7.71 – 7.58 (m, 2H), 7.39 (dd,  $J = 9.1, 2.5$  Hz, 1H), 7.33 (q,  $J = 4.5, 3.7$  Hz, 4H), 7.22 (tt,  $J = 5.4, 2.4$  Hz, 1H), 6.93 (d,  $J = 2.5$  Hz, 1H), 5.58 (s, 1H), 5.35 (dd,  $J = 9.2, 1.7$  Hz, 1H), 3.69 (s, 3H), 3.19 – 3.05 (m, 1H), 2.91 (ddd,  $J = 13.2, 7.3, 4.9$  Hz, 1H), 2.35 – 2.23 (m, 1H), 1.97 (dddd,  $J = 11.4, 9.1, 5.7, 3.6$  Hz, 1H);  $^{13}\text{C NMR}$  (101 MHz, Chloroform-*d*)  $\delta$  160.2, 158.6, 142.0, 141.3, 129.3, 129.0, 128.5, 127.9, 127.5, 127.0, 125.9, 124.3, 124.2, 124.2, 121.6, 121.6, 104.6, 68.1, 55.4, 40.5, 32.0. HRMS (ESI)  $m/z$  calcd for  $\text{C}_{23}\text{H}_{21}\text{NNaO}$  ( $\text{M}+\text{Na}$ ) $^+$  366.1465, found 366.1459.

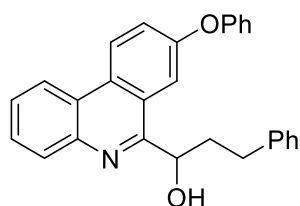

**1-(8-phenoxyphenanthridin-6-yl)-3-phenylpropan-1-ol (3d):** yellow oil. Purification by preparative thin layer chromatography was performed (PE/Ea: 10/1) to yield **3d** (42.1 mg, 52%) as a yellow oil;  $^1\text{H NMR}$  (400 MHz, Chloroform-*d*)  $\delta$  8.61 (d,  $J = 9.1$  Hz, 1H), 8.49 (d,  $J = 7.6$  Hz, 1H), 8.19 – 8.12 (m, 1H), 7.76 – 7.64 (m, 2H), 7.58 (dd,  $J = 9.0, 2.4$  Hz, 1H), 7.49 – 7.39 (m, 3H), 7.22 (dd,  $J = 13.9, 5.8$  Hz, 3H), 7.17 – 7.07 (m, 5H), 5.56 (s, 1H), 5.30 (d,  $J = 8.5$  Hz, 1H), 2.88 (t,  $J = 7.9$  Hz, 2H), 2.27 (dtd,  $J = 16.7, 8.6, 2.4$  Hz, 1H), 1.92 (dq,  $J = 15.0, 8.0$  Hz, 1H);  $^{13}\text{C NMR}$  (101 MHz, Chloroform-*d*)  $\delta$  160.3, 156.6, 156.5, 141.8, 141.6, 130.2, 129.5, 129.1, 128.6, 128.5, 128.4, 127.3, 125.8, 124.9, 124.3, 124.2, 124.1, 123.4, 121.8, 119.2, 112.5, 69.1, 40.5, 32.1. HRMS (ESI)  $m/z$  calcd for  $\text{C}_{28}\text{H}_{24}\text{NO}_2$  ( $\text{M}+\text{H}$ ) $^+$  406.1802, found 406.1801.

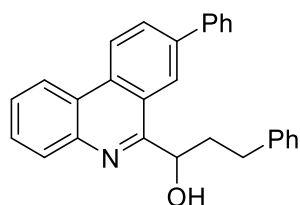

**3-phenyl-1-(8-phenylphenanthridin-6-yl)propan-1-ol (3e):** yellow oil. Purification by

preparative thin layer chromatography was performed (PE/EA: 10/1) to yield **3e** (41.3 mg, 53%) as a yellow oil; <sup>1</sup>H NMR (400 MHz, Chloroform-*d*) δ 8.66 (d, *J* = 8.6 Hz, 1H), 8.54 (d, *J* = 7.6 Hz, 1H), 8.21 – 8.14 (m, 1H), 8.07 (dd, *J* = 8.6, 1.7 Hz, 1H), 7.96 (d, *J* = 1.5 Hz, 1H), 7.75 (ddd, *J* = 8.2, 7.0, 1.4 Hz, 1H), 7.67 (ddd, *J* = 8.3, 7.0, 1.4 Hz, 1H), 7.63 – 7.50 (m, 4H), 7.50 – 7.42 (m, 1H), 7.33 – 7.26 (m, 4H), 7.22 (ddd, *J* = 8.4, 5.1, 2.3 Hz, 1H), 5.63 – 5.43 (m, 1H), 3.11 (dt, *J* = 13.8, 8.3 Hz, 1H), 2.91 (ddd, *J* = 13.3, 7.8, 4.8 Hz, 1H), 2.45 – 2.33 (m, 1H), 2.03 (dt, *J* = 16.7, 7.9, 4.8 Hz, 1H); <sup>13</sup>C NMR (101 MHz, Chloroform-*d*) δ 161.3, 142.1, 141.8, 140.1, 139.8, 132.3, 130.0, 129.5, 129.1, 128.9, 128.9, 128.6, 128.1, 127.4, 127.1, 126.0, 124.0, 123.4, 123.3, 122.8, 122.2, 68.2, 40.8, 31.8. HRMS (ESI) *m/z* calcd for C<sub>28</sub>H<sub>24</sub>NO (M+H)<sup>+</sup> 390.1852, found 390.1859.

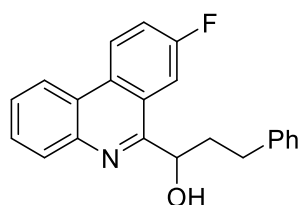

**1-(8-fluorophenanthridin-6-yl)-3-phenylpropan-1-ol (3f)**<sup>9</sup>: yellow oil. Purification by preparative thin layer chromatography was performed (PE/EA: 10/1) to yield **3f** (35.8 mg, 54%) as a yellow oil; <sup>1</sup>H NMR (400 MHz, Chloroform-*d*) δ 8.577 (dd, *J* = 9.2, 5.2 Hz, 1H), 8.439 (d, *J* = 8 Hz, 1H), 8.132 (d, *J* = 8 Hz, 1H), 7.739-7.702 (m, 1H), 7.648 (t, *J* = 7.6 Hz, 1H), 7.572-7.522 (m, 1H), 7.395 (dd, *J* = 9.6, 2.8 Hz, 1H), 7.321-7.268 (m, 2H), 7.255-7.231 (m, 1H), 7.203-7.167 (m, 1H), 5.437 (s, 1H), 5.341 (d, *J* = 8.8 Hz, 1H), 3.042-2.967 (m, 1H), 2.932-2.864 (m, 1H), 2.344-2.268 (m, 1H), 2.042-1.922 (m, 1H); <sup>13</sup>C NMR (101 MHz, Chloroform-*d*) δ 161.2 (d, *J* = 249.4 Hz), 160.2 (d, *J* = 4.2 Hz), 141.7, 141.6, 129.9, 129.5, 128.7, 128.6, 128.4, 127.3, 125.9, 125.3 (d, *J* = 8.6 Hz), 124.1 (d, *J* = 7.9 Hz), 123.7, 121.8, 120.0 (d, *J* = 23.7 Hz), 109.7 (d, *J* = 21.8 Hz), 68.8, 40.4, 31.8; <sup>19</sup>F NMR (376 MHz, Chloroform-*d*) δ -111.00.

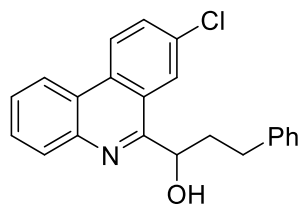

**1-(8-chlorophenanthridin-6-yl)-3-phenylpropan-1-ol (3g)**<sup>9</sup>: yellow oil. Purification by preparative thin layer chromatography was performed (PE/EA: 10/1) to yield **3g** (31.2 mg, 45%) as a yellow oil; <sup>1</sup>H NMR (400 MHz, Chloroform-*d*) δ 8.50 (d, *J* = 8.8 Hz, 1H), 8.44 (d, *J* = 8.1 Hz, 1H), 8.13 (d, *J* = 8.1 Hz, 1H), 7.73 (dd, *J* = 13.6, 5.0 Hz, 3H), 7.65 (t, *J* = 7.5 Hz, 1H), 7.29 (dt, *J* = 12.8, 7.2 Hz, 4H), 7.20 (t, *J* = 7.0 Hz, 1H), 5.34 (d, *J* = 7.4 Hz, 1H), 3.02 (dt, *J* = 14.0, 8.3 Hz, 1H),

2.90 (ddd,  $J = 13.6, 8.7, 4.8$  Hz, 1H), 2.31 (dt,  $J = 15.0, 8.2$  Hz, 1H), 1.97 (ddt,  $J = 18.5, 8.5, 5.0$  Hz, 1H);  $^{13}\text{C}$  NMR (101 MHz, Chloroform- $d$ )  $\delta$  160.1, 142.0, 141.6, 133.5, 131.6, 131.4, 129.6, 129.2, 128.7, 128.5, 127.4, 126.0, 124.5, 124.4, 123.9, 123.6, 122.0, 68.6, 40.6, 31.9.

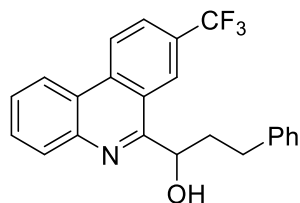

**3-phenyl-1-(8-(trifluoromethyl)phenanthridin-6-yl)propan-1-ol (3h)**: yellow oil. Purification by preparative thin layer chromatography was performed (PE/EA: 10/1) to yield **3h** (36.6 mg, 48%) as a yellow oil;  $^1\text{H}$  NMR (400 MHz, Chloroform- $d$ )  $\delta$  8.713 (d,  $J = 8.4$  Hz, 1H), 8.532 (d,  $J = 8.4$  Hz, 1H), 8.168 (d,  $J = 8.4$  Hz, 1H), 8.050 (s, 1H), 8.001 (d,  $J = 8.4$  Hz, 1H), 7.804 (dd,  $J = 8, 7.2$  Hz, 1H), 7.721-7.683 (m, 1H), 7.306-7.268 (m, 3H), 7.224-7.157 (m, 1H), 7.243 (s, 1H), 5.403 (d,  $J = 8.8$  Hz, 1H), 5.348 (s, 1H), 3.077-3.001 (m, 1H), 2.933-2.867 (m, 1H), 2.354-2.275 (m, 1H), 2.014-1.925 (m, 1H);  $^{13}\text{C}$  NMR (101 MHz, Chloroform- $d$ )  $\delta$  161.2, 142.8, 141.3, 135.4, 130.1, 129.7, 129.2 (q,  $J = 33.0$  Hz), 128.7, 128.6, 127.6, 126.7 (q,  $J = 3.0$  Hz), 126.1, 123.9, 123.8 (q,  $J = 257$  Hz), 123.2, 122.5, 122.4, 68.4, 40.8, 31.8;  $^{19}\text{F}$  NMR (376 MHz, Chloroform- $d$ )  $\delta$  -62.19. HRMS (ESI)  $m/z$  calcd for  $\text{C}_{23}\text{H}_{18}\text{NONaF}_3$  ( $\text{M}+\text{Na}$ ) $^+$  404.1233, found 404.1244.

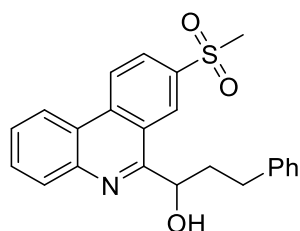

**1-(6-(1-hydroxy-3-phenylpropyl)phenanthridin-8-yl)ethan-1-one (3i)**: white solid. mp: 88 – 90 °C. Purification by preparative thin layer chromatography was performed (PE/EA: 3/1) to yield **3i** (36.0 mg, 46%) as a white solid;  $^1\text{H}$  NMR (400 MHz, Chloroform- $d$ )  $\delta$  8.82 (d,  $J = 8.7$  Hz, 1H), 8.64 – 8.50 (m, 2H), 8.37 – 8.28 (m, 1H), 8.23 (d,  $J = 8.1$  Hz, 1H), 7.87 (t,  $J = 7.6$  Hz, 1H), 7.76 (t,  $J = 7.6$  Hz, 1H), 7.23 (t,  $J = 7.5$  Hz, 4H), 7.14 (t,  $J = 6.6$  Hz, 1H), 5.56 – 5.48 (m, 1H), 5.34 (s, 1H), 3.12 (s, 3H), 3.02 (dt,  $J = 14.3, 8.2$  Hz, 1H), 2.89 (ddd,  $J = 13.8, 8.8, 5.0$  Hz, 1H), 2.39 (dtd,  $J = 16.5, 8.9, 2.4$  Hz, 1H), 2.04 (ddd,  $J = 16.4, 8.1, 3.8$  Hz, 1H);  $^{13}\text{C}$  NMR (101 MHz, Chloroform- $d$ )  $\delta$  161.4, 143.0, 141.3, 139.2, 136.6, 130.8, 129.7, 128.6, 128.6, 128.0, 127.9, 125.9, 125.5, 124.6, 123.0, 122.8, 122.6, 68.8, 44.6, 40.7, 31.6. HRMS (ESI)  $m/z$  calcd for  $\text{C}_{23}\text{H}_{22}\text{NSO}_3$  ( $\text{M}+\text{H}$ ) $^+$  392.1315, found 392.1311.

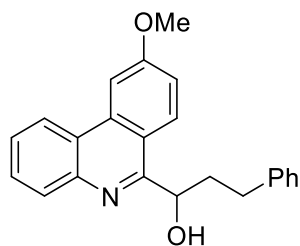

**1-(9-methoxyphenanthridin-6-yl)-3-phenylpropan-1-ol (3j):** yellow oil. Purification by preparative thin layer chromatography was performed (PE/Ea: 10/1) to yield **3j** (22.6 mg, 33%) as a yellow oil;  $^1\text{H}$  NMR (400 MHz, Chloroform-*d*)  $\delta$  8.52 (d,  $J = 8.0$  Hz, 1H), 8.25 (d,  $J = 8.2$  Hz, 1H), 8.22 – 8.07 (m, 1H), 7.84 – 7.70 (m, 2H), 7.70 – 7.61 (m, 1H), 7.37 – 7.24 (m, 4H), 7.24 – 7.14 (m, 1H), 7.07 (d,  $J = 8.0$  Hz, 1H), 5.82 (dd,  $J = 8.9, 1.9$  Hz, 1H), 3.76 (s, 3H), 3.04 (dt,  $J = 17.8, 8.5, 4.9$  Hz, 2H), 2.32 – 2.20 (m, 1H), 1.69 (ddt,  $J = 18.3, 8.9, 5.3$  Hz, 1H);  $^{13}\text{C}$  NMR (101 MHz, Chloroform-*d*)  $\delta$  161.6, 158.0, 142.85, 141.8, 135.9, 131.4, 129.1, 129.0, 128.9, 128.3, 126.8, 125.6, 123.7, 122.6, 115.2, 114.8, 108.3, 72.0, 55.3, 41.6, 33.0. HRMS (ESI)  $m/z$  calcd for  $\text{C}_{23}\text{H}_{21}\text{NNaO}_2$  ( $\text{M}+\text{Na}$ ) $^+$  366.1465, found 366.1468.

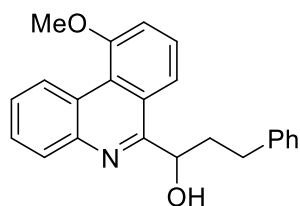

**1-(10-methoxyphenanthridin-6-yl)-3-phenylpropan-1-ol (3k):** yellow oil. Purification by preparative thin layer chromatography was performed (PE/Ea: 10/1) to yield **3k** (28.8 mg, 42%) as a yellow oil;  $^1\text{H}$  NMR (400 MHz, Chloroform-*d*)  $\delta$  9.49 (d,  $J = 8.5$  Hz, 1H), 8.18 (d,  $J = 8.0$  Hz, 1H), 7.74 (t,  $J = 7.4$  Hz, 1H), 7.66 (t,  $J = 7.7$  Hz, 1H), 7.59 (t,  $J = 8.0$  Hz, 1H), 7.49 (d,  $J = 8.1$  Hz, 1H), 7.32 (d,  $J = 7.9$  Hz, 1H), 7.26 (p,  $J = 7.3$  Hz, 4H), 7.18 (t,  $J = 6.8$  Hz, 1H), 5.47 (d,  $J = 7.9$  Hz, 1H), 4.15 (s, 3H), 3.01 (dt,  $J = 14.1, 8.2$  Hz, 1H), 2.88 (ddd,  $J = 14.0, 9.7, 4.7$  Hz, 1H), 2.42 – 2.28 (m, 1H), 1.98 (ddt,  $J = 18.4, 9.0, 5.0$  Hz, 1H);  $^{13}\text{C}$  NMR (101 MHz, Chloroform-*d*)  $\delta$  160.6, 158.6, 142.0, 131.0, 129.1, 128.7, 128.4, 128.3, 128.0, 127.7, 126.9, 125.8, 125.1, 124.0, 123.9, 117.2, 111.9, 69.0, 55.9, 40.6, 32.0. HRMS (ESI)  $m/z$  calcd for  $\text{C}_{23}\text{H}_{22}\text{NO}_2$  ( $\text{M}+\text{H}$ ) $^+$  344.1645, found 344.1641.

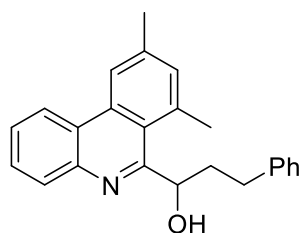

**1-(6,8-dimethylphenanthren-9-yl)-3-phenylpropan-1-ol (3l)**: yellow oil. Purification by preparative thin layer chromatography was performed (PE/EA: 10/1) to yield **3l** (20.5 mg, 30%) as a yellow oil;  $^1\text{H}$  NMR (400 MHz, Chloroform-*d*)  $\delta$  8.52 (d,  $J = 8.2$  Hz, 1H), 8.34 (s, 1H), 8.09 (d,  $J = 8.0$  Hz, 1H), 7.70 (t,  $J = 7.5$  Hz, 1H), 7.61 (t,  $J = 7.6$  Hz, 1H), 7.29 – 7.17 (m, 5H), 7.14 (t,  $J = 6.9$  Hz, 1H), 6.31 (s, 1H), 5.73 – 5.65 (m, 1H), 2.99 – 2.91 (m, 2H), 2.67 (s, 3H), 2.56 (s, 3H), 2.11 – 1.99 (m, 1H), 1.70 – 1.56 (m, 2H);  $^{13}\text{C}$  NMR (101 MHz, Chloroform-*d*)  $\delta$  161.8, 142.1, 141.0, 140.6, 135.7, 135.3, 133.9, 128.8, 128.7, 128.7, 128.4, 126.8, 125.8, 124.4, 122.40, 121.6, 120.9, 71.0, 42.1, 32.47, 24.7, 21.9. HRMS (ESI)  $m/z$  calcd for  $\text{C}_{24}\text{H}_{24}\text{NO}_2$  ( $\text{M}+\text{H}$ ) $^+$  342.1852, found 342.1852.

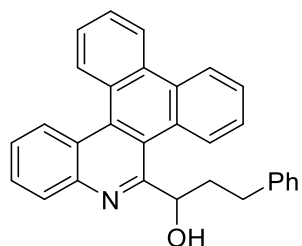

**1-(dibenzo[i,k]phenanthridin-5-yl)-3-phenylpropan-1-ol (3m)**: yellow oil. Purification by preparative thin layer chromatography was performed (PE/EA: 10/1) to yield **3m** (37.2 mg, 45%) as a yellow oil;  $^1\text{H}$  NMR (400 MHz, Chloroform-*d*)  $\delta$  8.75 (d,  $J = 8.2$  Hz, 1H), 8.71 – 8.59 (m, 3H), 8.26 – 8.17 (m, 2H), 7.77 (q,  $J = 7.2$  Hz, 2H), 7.72 – 7.57 (m, 3H), 7.43 (t,  $J = 7.6$  Hz, 1H), 7.15 (dq,  $J = 14.3, 7.1$  Hz, 3H), 7.04 (d,  $J = 6.9$  Hz, 2H), 5.88 (dd,  $J = 8.8, 2.6$  Hz, 1H), 2.83 (dt,  $J = 13.9, 8.2$  Hz, 1H), 2.72 (ddd,  $J = 13.6, 8.7, 5.0$  Hz, 1H), 2.20 (dtd,  $J = 13.7, 8.4, 2.7$  Hz, 1H), 1.90 (dtd,  $J = 13.8, 8.7, 5.1$  Hz, 1H);  $^{13}\text{C}$  NMR (101 MHz, Chloroform-*d*)  $\delta$  159.2, 144.0, 141.7, 135.6, 132.3, 130.4, 130.0, 128.9, 128.8, 128.7, 128.5, 128.3, 128.1, 128.0, 127.6, 127.6, 127.4, 127.1, 127.0, 126.4, 125.8, 123.8, 123.6, 123.4, 121.4, 71.7, 39.6, 32.1. HRMS (ESI)  $m/z$  calcd for  $\text{C}_{30}\text{H}_{23}\text{NNaO}$  ( $\text{M}+\text{Na}$ ) $^+$  36.1672, found 436.1659.

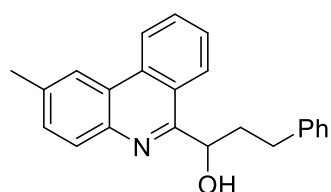

**1-(2-methylphenanthridin-6-yl)-3-phenylpropan-1-ol (3n)<sup>9</sup>:** yellow oil. Purification by preparative thin layer chromatography was performed (PE/EA: 10/1) to yield **3n** (25.5 mg, 39%) as a yellow oil; <sup>1</sup>H NMR (400 MHz, Chloroform-*d*) δ 8.61 (d, *J* = 8.3 Hz, 1H), 8.31 (s, 1H), 8.04 (d, *J* = 8.3 Hz, 1H), 7.88 – 7.76 (m, 2H), 7.64 – 7.52 (m, 2H), 7.33 – 7.22 (m, 4H), 7.22 – 7.14 (m, 1H), 5.62 (s, 1H), 5.47 (dd, *J* = 8.5, 2.2 Hz, 1H), 3.01 (ddd, *J* = 13.8, 9.2, 7.5 Hz, 1H), 2.88 (td, *J* = 9.5, 4.8 Hz, 1H), 2.62 (s, 3H), 2.36 (tdd, *J* = 13.9, 8.5, 2.3 Hz, 1H), 1.98 (dtd, *J* = 13.8, 9.1, 4.8 Hz, 1H); <sup>13</sup>C NMR (101 MHz, Chloroform-*d*) δ 160.0, 142.0, 140.4, 136.9, 133.1, 130.6, 130.6, 129.2, 128.7, 128.4, 127.2, 125.9, 125.0, 124.0, 123.1, 122.7, 121.8, 68.8, 40.8, 32.0, 22.0.

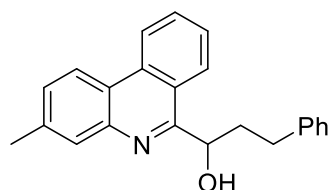

**1-(3-methylphenanthridin-6-yl)-3-phenylpropan-1-ol (3o)<sup>9</sup>:** yellow oil. Purification by preparative thin layer chromatography was performed (PE/EA: 10/1) to yield **3o** (26.8 mg, 41%) as a yellow oil; <sup>1</sup>H NMR (400 MHz, Chloroform-*d*) δ 8.58 (d, *J* = 8.3 Hz, 1H), 8.41 (d, *J* = 8.3 Hz, 1H), 7.95 (s, 1H), 7.90 – 7.75 (m, 2H), 7.58 (t, *J* = 7.6 Hz, 1H), 7.49 (d, *J* = 8.3 Hz, 1H), 7.26 (q, *J* = 6.7, 6.3 Hz, 4H), 7.19 (d, *J* = 5.0 Hz, 1H), 5.65 (s, 1H), 5.48 (d, *J* = 8.4 Hz, 1H), 3.02 (dt, *J* = 15.7, 8.2 Hz, 1H), 2.95 – 2.82 (m, 1H), 2.60 (t, *J* = 2.2 Hz, 3H), 2.46 – 2.28 (m, 1H), 1.99 (ddt, *J* = 18.4, 9.2, 3.9 Hz, 1H); <sup>13</sup>C NMR (101 MHz, Chloroform-*d*) δ 161.0, 142.2, 142.0, 139.2, 133.4, 130.8, 129.0, 128.8, 128.7, 128.4, 126.9, 125.9, 125.0, 122.7, 122.6, 121.9, 121.8, 68.8, 40.8, 32.0, 21.6.

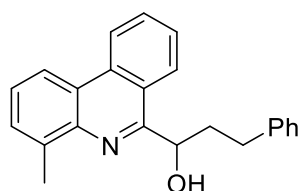

**1-(4-methylphenanthridin-6-yl)-3-phenylpropan-1-ol (3p)<sup>9</sup>:** yellow oil. Purification by preparative thin layer chromatography was performed (PE/EA: 10/1) to yield **3p** (30.1 mg, 46%) as a yellow oil; <sup>1</sup>H NMR (400 MHz, Chloroform-*d*) δ 8.64 (d, *J* = 8.4 Hz, 1H), 8.42 (d, *J* = 8.0 Hz, 1H), 7.90 – 7.79 (m, 2H), 7.66 – 7.53 (m, 3H), 7.27 (p, *J* = 7.2, 6.6 Hz, 4H), 7.18 (t, *J* = 6.8 Hz, 1H), 5.81 (s, 1H), 5.51 (d, *J* = 6.8 Hz, 1H), 3.10 – 2.98 (m, 1H), 2.89 (s, 4H), 2.40 (ddt, *J* = 14.2, 7.3, 3.7 Hz, 1H), 2.00 (dtd, *J* = 13.8, 9.0, 4.9 Hz, 1H); <sup>13</sup>C NMR (101 MHz, Chloroform-*d*) δ 159.5, 141.9, 140.5, 137.0, 133.7, 130.7, 129.7, 128.7, 128.4, 127.2, 126.7, 125.9, 124.9, 124.0, 123.0, 122.7, 120.0, 69.0, 40.8, 32.0, 18.4.



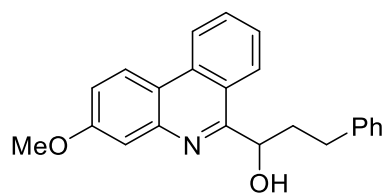

**1-(3-methoxyphenanthridin-6-yl)-3-phenylpropan-1-ol (3q)**<sup>9</sup>: yellow oil. Purification by preparative thin layer chromatography was performed (PE/EA: 10/1) to yield **3q** (28.2 mg, 42%) as a yellow oil; <sup>1</sup>H NMR (400 MHz, Chloroform-*d*)  $\delta$  8.52 (d, *J* = 8.3 Hz, 1H), 8.41 (d, *J* = 9.0 Hz, 1H), 7.86 – 7.75 (m, 2H), 7.56 (d, *J* = 7.8 Hz, 2H), 7.29 (dt, *J* = 17.6, 9.1 Hz, 5H), 7.19 (t, *J* = 6.4 Hz, 1H), 5.49 (d, *J* = 7.6 Hz, 1H), 4.01 (s, 3H), 3.03 (dt, *J* = 16.4, 8.3 Hz, 1H), 2.91 (td, *J* = 14.0, 11.7, 4.7 Hz, 1H), 2.36 (dt, *J* = 14.8, 8.2 Hz, 1H), 2.00 (dtd, *J* = 13.8, 8.9, 5.0 Hz, 1H); <sup>13</sup>C NMR (101 MHz, Chloroform-*d*)  $\delta$  161.6, 160.3, 143.6, 141.9, 133.5, 130.9, 128.7, 128.4, 126.3, 125.9, 125.0, 123.4, 122.3, 122.0, 118.2, 118.0, 109.3, 68.9, 55.6, 40.8, 32.0.

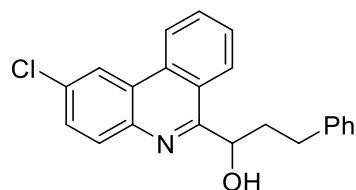

**1-(2-chlorophenanthridin-6-yl)-3-phenylpropan-1-ol (3r)**: white solid. mp: 169 – 172 °C. Purification by preparative thin layer chromatography was performed (PE/EA: 10/1) to yield **3r** (38.2 mg, 55%) as a white solid; <sup>1</sup>H NMR (400 MHz, Chloroform-*d*)  $\delta$  8.47 (d, *J* = 8.7 Hz, 1H), 8.42 (d, *J* = 2.0 Hz, 1H), 8.03 (d, *J* = 8.7 Hz, 1H), 7.81 (dt, *J* = 7.2, 3.0 Hz, 2H), 7.69 – 7.59 (m, 2H), 7.31 – 7.21 (m, 4H), 7.18 (t, *J* = 6.9 Hz, 1H), 5.44 (d, *J* = 8.3 Hz, 1H), 3.01 (dt, *J* = 14.0, 8.3 Hz, 1H), 2.90 (ddd, *J* = 13.8, 9.3, 4.8 Hz, 1H), 2.32 (dt, *J* = 16.2, 8.5 Hz, 1H), 1.97 (dtd, *J* = 18.1, 8.9, 5.0 Hz, 1H); <sup>13</sup>C NMR (101 MHz, Chloroform-*d*)  $\delta$  161.4, 141.8, 140.4, 132.9, 132.2, 131.1, 130.8, 129.4, 128.7, 128.4, 128.1, 126.0, 125.2, 125.1, 123.1, 122.7, 121.8, 68.9, 40.7, 32.0. HRMS (ESI) *m/z* calcd for C<sub>22</sub>H<sub>18</sub>NOCINa (M+Na)<sup>+</sup> 370.0969, found 370.0965.

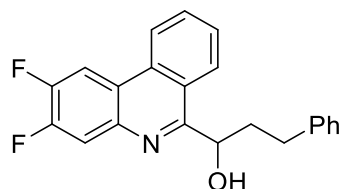

**1-(2,6-difluorophenanthridin-6-yl)-3-phenylpropan-1-ol (3s)**: white solid. mp: 104 – 107 °C. Purification by preparative thin layer chromatography was performed (PE/EA: 10/1) to yield **3s** (35.0 mg, 50%) as a white solid; <sup>1</sup>H NMR (400 MHz, Chloroform-*d*)  $\delta$  8.375 (d, *J* = 8 Hz, 1H), 8.184

(dd,  $J = 11.6, 8$  Hz, 1H), 7.887-7.815 (m, 3H), 7.645 (t,  $J = 7.6$  Hz, 1H), 7.313-7.264 (m, 3H), 7.243 (s, 1H), 7.224-7.185 (m, 1H), 5.455 (d,  $J = 8$  Hz, 1H), 5.308 (s, 1H), 3.060-2.985 (m, 1H), 2.955-2.885 (m, 1H), 2.370-2.288 (m, 1H), 2.026-1.935 (m, 1H);  $^{13}\text{C}$  NMR (101 MHz, Chloroform-*d*)  $\delta$  161.9, 152.4 (d,  $J = 14.3$  Hz), 151.3 (d,  $J = 14.4$  Hz), 149.9 (d,  $J = 15.0$  Hz), 148.8 (d,  $J = 14.5$  Hz), 141.7, 139.1 (d,  $J = 9.8$  Hz), 132.3, 131.2, 128.6 (d,  $J = 28.4$  Hz), 127.8, 126.0, 125.2, 122.6, 121.1 (d,  $J = 6.0$  Hz), 116.4 (d,  $J = 16.5$  Hz), 109.3 (d,  $J = 19.0$  Hz), 68.9, 40.7, 32.0;  $^{19}\text{F}$  NMR (376 MHz, Chloroform-*d*)  $\delta$  -134.33 (d,  $J = 21.9$  Hz), -135.73 (d,  $J = 21.8$  Hz). HRMS (ESI)  $m/z$  calcd for  $\text{C}_{22}\text{H}_{17}\text{NOF}_2\text{Na}$  ( $\text{M}+\text{Na}$ ) $^+$  372.1170, found 372.1169.

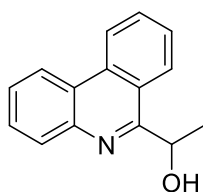

**1-(phenanthridin-6-yl)ethan-1-ol (4a)**<sup>10</sup>: yellow oil. Purification by preparative thin layer chromatography was performed (PE/EA: 10/1) to yield **4a** (25.0 mg, 56%) as a yellow oil;  $^1\text{H}$  NMR (400 MHz, Chloroform-*d*)  $\delta$  8.66 (d,  $J = 8.3$  Hz, 1H), 8.56 (d,  $J = 8.4$  Hz, 1H), 8.18 – 8.09 (m, 2H), 7.91 – 7.83 (m, 1H), 7.79 – 7.63 (m, 3H), 5.64 (q,  $J = 6.5$  Hz, 2H), 1.66 (d,  $J = 6.4$  Hz, 3H);  $^{13}\text{C}$  NMR (101 MHz, Chloroform-*d*)  $\delta$  162.1, 142.1, 133.4, 130.9, 129.4, 129.0, 127.5, 127.0, 125.3, 124.2, 123.0, 122.8, 122.1, 66.0, 25.3.

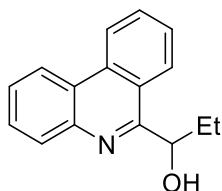

**1-(phenanthridin-6-yl)propan-1-ol (4b)**: yellow oil. Purification by preparative thin layer chromatography was performed (PE/EA: 10/1) to yield **4b** (25.6 mg, 54%) as a yellow oil;  $^1\text{H}$  NMR (400 MHz, Chloroform-*d*)  $\delta$  8.61 (d,  $J = 8.3$  Hz, 1H), 8.51 (d,  $J = 8.1$  Hz, 1H), 8.14 (d,  $J = 8.1$  Hz, 1H), 8.08 (d,  $J = 8.2$  Hz, 1H), 7.83 (t,  $J = 7.6$  Hz, 1H), 7.77 – 7.60 (m, 3H), 5.54 (s, 1H), 5.51 – 5.41 (m, 1H), 2.15 (dq,  $J = 14.6, 7.4, 2.8$  Hz, 1H), 1.74 (dp,  $J = 14.5, 7.3$  Hz, 1H), 1.07 (t,  $J = 7.4$  Hz, 3H);  $^{13}\text{C}$  NMR (101 MHz, Chloroform-*d*)  $\delta$  161.1, 142.0, 133.2, 130.8, 129.5, 128.9, 127.4, 127.0, 125.2, 124.1, 123.2, 122.7, 122.1, 70.7, 31.8, 9.9. HRMS (ESI)  $m/z$  calcd for  $\text{C}_{16}\text{H}_{16}\text{NO}$  ( $\text{M}+\text{H}$ ) $^+$  238.1227, found 238.1226.

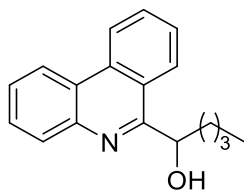

**1-(phenanthridin-6-yl)propan-1-ol (4c)**: white solid. mp: 90 – 93 °C. Purification by preparative thin layer chromatography was performed (PE/EA: 10/1) to yield **4c** (23.3 mg, 44%) as a white solid;  $^1\text{H}$  NMR (400 MHz, Chloroform-*d*)  $\delta$  8.65 (d,  $J$  = 8.3 Hz, 1H), 8.55 (d,  $J$  = 7.9 Hz, 1H), 8.13 (dd,  $J$  = 19.7, 7.8 Hz, 2H), 7.86 (t,  $J$  = 7.7 Hz, 1H), 7.79 – 7.61 (m, 3H), 5.55 – 5.46 (m, 1H), 2.14 – 1.99 (m, 1H), 1.68 (ddq,  $J$  = 17.5, 10.1, 5.7, 5.1 Hz, 2H), 1.52 (dddd,  $J$  = 17.7, 11.6, 7.7, 2.3 Hz, 1H), 1.46 – 1.37 (m, 1H), 1.37 – 1.28 (m, 1H), 0.90 (t,  $J$  = 7.3 Hz, 3H);  $^{13}\text{C}$  NMR (101 MHz, Chloroform-*d*)  $\delta$  161.5, 142.1, 133.3, 130.9, 129.4, 128.9, 127.4, 127.0, 125.2, 124.1, 123.1, 122.8, 122.1, 69.7, 38.8, 27.9, 22.8, 14.1. HRMS (ESI)  $m/z$  calcd for  $\text{C}_{18}\text{H}_{20}\text{NO}$  ( $\text{M}+\text{H}$ ) $^+$  266.1539, found 266.1511.

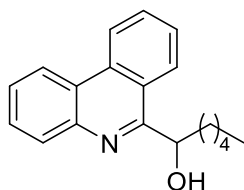

**1-(phenanthridin-6-yl)hexan-1-ol (4d)**: yellow oil. Purification by preparative thin layer chromatography was performed (PE/EA: 10/1) to yield **4d** (13.4 mg, 24%) as a yellow oil;  $^1\text{H}$  NMR (400 MHz, Chloroform-*d*)  $\delta$  8.67 (d,  $J$  = 8.3 Hz, 1H), 8.57 (d,  $J$  = 8.1 Hz, 1H), 8.16 (d,  $J$  = 8.1 Hz, 1H), 8.11 (d,  $J$  = 8.2 Hz, 1H), 7.88 (t,  $J$  = 7.7 Hz, 1H), 7.72 (ddd,  $J$  = 19.4, 11.2, 8.1 Hz, 3H), 5.51 (d,  $J$  = 4.9 Hz, 1H), 2.06 (t,  $J$  = 10.4 Hz, 1H), 1.68 (dq,  $J$  = 17.9, 10.3 Hz, 2H), 1.62 – 1.48 (m, 1H), 1.35 – 1.27 (m, 4H), 0.88 (t,  $J$  = 6.8 Hz, 3H);  $^{13}\text{C}$  NMR (101 MHz, Chloroform-*d*)  $\delta$  161.5, 142.1, 133.3, 130.9, 129.4, 128.9, 127.4, 127.0, 125.2, 124.1, 123.1, 122.8, 122.1, 69.8, 39.1, 31.9, 25.5, 22.7, 14.1. HRMS (ESI)  $m/z$  calcd for  $\text{C}_{19}\text{H}_{21}\text{NONa}$  ( $\text{M}+\text{Na}$ ) $^+$  302.1515, found 302.1524.

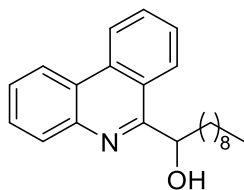

**1-(phenanthridin-6-yl)decan-1-ol (4e)**: white solid. mp: 65 – 69 °C. Purification by preparative thin layer chromatography was performed (PE/EA: 10/1) to yield **4e** (26.8 mg, 40%) as a white solid;  $^1\text{H}$  NMR (400 MHz, Chloroform-*d*)  $\delta$  8.65 (d,  $J$  = 8.3 Hz, 1H), 8.55 (d,  $J$  = 8.1 Hz, 1H), 8.15 (d,  $J$  = 8.0 Hz, 1H), 8.10 (d,  $J$  = 8.2 Hz, 1H), 7.86 (t,  $J$  = 7.6 Hz, 1H), 7.79 – 7.61 (m, 3H), 5.56 – 5.47 (m, 1H), 2.06 (t,  $J$  = 10.1 Hz, 1H), 1.75 – 1.61 (m, 2H), 1.38 (dd,  $J$  = 13.9, 8.9 Hz, 1H), 1.24 (s,

12H), 0.87 (t,  $J = 6.7$  Hz, 3H);  $^{13}\text{C}$  NMR (101 MHz, Chloroform-*d*)  $\delta$  161.5, 142.0, 133.3, 130.9, 129.4, 128.9, 127.4, 127.0, 125.2, 124.1, 123.1, 122.8, 122.1, 69.8, 39.1, 31.9, 29.6, 29.6, 29.4, 25.8, 22.7, 14.2. HRMS (ESI)  $m/z$  calcd for  $\text{C}_{23}\text{H}_{30}\text{NO}$  ( $\text{M}+\text{H}$ ) $^+$  336.2322, found 336.2293.

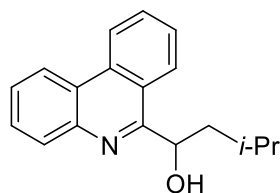

**5-chloro-1-(phenanthridin-6-yl)pentan-1-ol (4f)**<sup>9</sup>: yellow oil. Purification by preparative thin layer chromatography was performed (PE/EA: 10/1) to yield **4f** (36.6 mg, 69%) as a yellow oil;  $^1\text{H}$  NMR (400 MHz, Chloroform-*d*)  $\delta$  8.62 (d,  $J = 8.3$  Hz, 1H), 8.52 (d,  $J = 8.1$  Hz, 1H), 8.13 (d,  $J = 8.1$  Hz, 1H), 8.05 (d,  $J = 8.2$  Hz, 1H), 7.75 – 7.60 (m, 3H), 5.56 (d,  $J = 9.4$  Hz, 1H), 5.44 (s, 1H), 2.26 (dqt,  $J = 13.3, 6.6, 4.2$  Hz, 1H), 1.74 (ddd,  $J = 13.6, 10.0, 1.6$  Hz, 1H), 1.57 (ddd,  $J = 14.1, 8.4, 3.8$  Hz, 1H), 1.24 (d,  $J = 6.6$  Hz, 3H), 0.96 (d,  $J = 6.8$  Hz, 3H);  $^{13}\text{C}$  NMR (101 MHz, Chloroform-*d*)  $\delta$  161.9, 142.1, 133.1, 130.8, 129.4, 128.9, 127.4, 126.9, 125.1, 124.1, 123.0, 122.8, 122.1, 68.2, 48.6, 25.5, 24.0, 21.6.

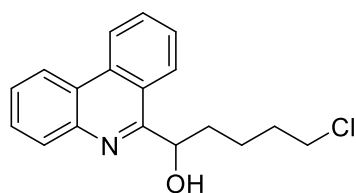

**5-chloro-1-(phenanthridin-6-yl)pentan-1-ol (4g)**: yellow oil. Purification by preparative thin layer chromatography was performed (PE/EA: 10/1) to yield **4g** (35.9 mg, 60%) as a yellow oil;  $^1\text{H}$  NMR (400 MHz, Chloroform-*d*)  $\delta$  8.64 (d,  $J = 8.3$  Hz, 1H), 8.54 (d,  $J = 8.1$  Hz, 1H), 8.17 – 8.11 (m, 1H), 8.07 (d,  $J = 8.2$  Hz, 1H), 7.90 – 7.82 (m, 1H), 7.78 – 7.63 (m, 3H), 5.51 (dd,  $J = 7.7, 2.4$  Hz, 1H), 3.53 (t,  $J = 6.4$  Hz, 2H), 2.18 – 2.03 (m, 1H), 1.83 (dddd,  $J = 19.8, 13.5, 10.4, 6.8$  Hz, 3H), 1.76 – 1.59 (m, 2H);  $^{13}\text{C}$  NMR (101 MHz, Chloroform-*d*)  $\delta$  160.9, 142.0, 133.3, 130.9, 129.5, 129.0, 127.5, 127.1, 125.0, 124.1, 123.0, 122.9, 122.1, 69.5, 45.0, 38.2, 32.6, 23.3. HRMS (ESI)  $m/z$  calcd for  $\text{C}_{18}\text{H}_{18}\text{NOCINa}$  ( $\text{M}+\text{Na}$ ) $^+$  322.0969, found 322.0969.

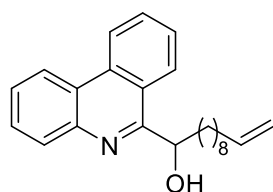

**1-(phenanthridin-6-yl)undec-10-en-1-ol (4h)**: yellow oil. Purification by preparative thin layer

chromatography was performed (PE/EA: 10/1) to yield **4h** (13.2 mg, 19%) as a yellow oil;  $^1\text{H}$  NMR (400 MHz, Chloroform-*d*)  $\delta$  8.66 (d,  $J$  = 8.3 Hz, 1H), 8.56 (d,  $J$  = 8.0 Hz, 1H), 8.18 – 8.13 (m, 1H), 8.10 (d,  $J$  = 8.2 Hz, 1H), 7.90 – 7.83 (m, 1H), 7.77 – 7.64 (m, 3H), 5.80 (ddt,  $J$  = 16.9, 10.2, 6.7 Hz, 1H), 5.51 (d,  $J$  = 4.8 Hz, 1H), 5.04 – 4.89 (m, 2H), 2.02 (dt,  $J$  = 14.4, 6.2 Hz, 3H), 1.66 (td,  $J$  = 11.3, 3.5 Hz, 2H), 1.37 – 1.32 (m, 2H), 1.27 (s, 9H);  $^{13}\text{C}$  NMR (101 MHz, Chloroform-*d*)  $\delta$  161.5, 142.1, 139.3, 133.3, 130.8, 129.5, 128.9, 127.4, 127.0, 125.2, 124.1, 123.2, 122.8, 122.1, 114.1, 69.8, 39.1, 33.8, 29.6, 29.6, 29.4, 29.1, 28.9, 25.8. HRMS (ESI)  $m/z$  calcd for  $\text{C}_{24}\text{H}_{29}\text{NNaO}$  ( $\text{M}+\text{Na}$ ) $^+$  370.2141, found 370.2156.

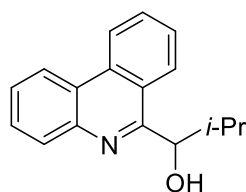

**2-ethyl-1-(phenanthridin-6-yl)hexan-1-ol (4i)**: yellow oil. Purification by preparative thin layer chromatography was performed (PE/EA: 10/1) to yield **4i** (17.6 mg, 35%) as a yellow oil;  $^1\text{H}$  NMR (400 MHz, Chloroform-*d*)  $\delta$  8.66 (d,  $J$  = 8.3 Hz, 1H), 8.56 (d,  $J$  = 8.1 Hz, 1H), 8.17 (d,  $J$  = 8.1 Hz, 1H), 8.12 (d,  $J$  = 8.2 Hz, 1H), 7.86 (t,  $J$  = 7.7 Hz, 1H), 7.71 (dq,  $J$  = 22.2, 7.3 Hz, 3H), 5.43 (s, 1H), 5.38 (s, 1H), 2.40 – 2.26 (m, 1H), 1.32 (d,  $J$  = 6.9 Hz, 3H), 0.63 (d,  $J$  = 6.7 Hz, 3H);  $^{13}\text{C}$  NMR (101 MHz, Chloroform-*d*)  $\delta$  161.0, 142.1, 133.3, 130.8, 129.5, 128.9, 127.4, 127.0, 125.6, 124.1, 123.4, 122.7, 122.1, 69.0, 17.72, 2.7, 0.9. HRMS (ESI)  $m/z$  calcd for  $\text{C}_{17}\text{H}_{18}\text{NNaO}$  ( $\text{M}+\text{Na}$ ) $^+$  274.1202, found 274.1182.

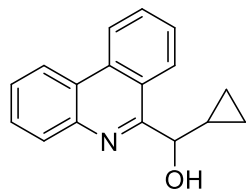

**cyclopropyl(phenanthridin-6-yl)methanol (4j)**<sup>9</sup>: yellow oil. Purification by preparative thin layer chromatography was performed (PE/EA: 10/1) to yield **4j** (15.0 mg, 30%) as a yellow oil;  $^1\text{H}$  NMR (400 MHz, Chloroform-*d*)  $\delta$  8.58 (d,  $J$  = 8.3 Hz, 1H), 8.49 (d,  $J$  = 8.0 Hz, 1H), 8.23 (d,  $J$  = 8.2 Hz, 1H), 8.12 (d,  $J$  = 8.1 Hz, 1H), 7.86 – 7.78 (m, 1H), 7.76 – 7.58 (m, 3H), 5.49 (d,  $J$  = 4.3 Hz, 1H), 5.41 (s, 1H), 1.36 (tq,  $J$  = 9.6, 5.2 Hz, 1H), 0.81 (dq,  $J$  = 9.1, 5.1, 3.8 Hz, 1H), 0.54 (ddt,  $J$  = 14.5, 9.6, 5.0 Hz, 2H), 0.31 (ddd,  $J$  = 12.7, 6.3, 3.2 Hz, 1H);  $^{13}\text{C}$  NMR (101 MHz, Chloroform-*d*)  $\delta$  160.7, 141.9, 133.3, 130.8, 129.5, 128.9, 127.3, 127.0, 125.4, 124.0, 123.4, 122.8, 122.1, 73.6, 34.6, 21.0, 14.6.

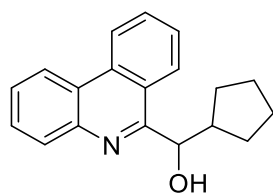

**cyclopentyl(phenanthridin-6-yl)methanol (4k)**: yellow oil. Purification by preparative thin layer chromatography was performed (PE/EA: 10/1) to yield **4k** (11.1 mg, 20%) as a yellow oil;  $^1\text{H NMR}$  (400 MHz, Chloroform-*d*)  $\delta$  8.66 (d,  $J = 8.3$  Hz, 1H), 8.55 (d,  $J = 7.8$  Hz, 1H), 8.22 – 8.12 (m, 2H), 7.90 – 7.83 (m, 1H), 7.77 – 7.62 (m, 3H), 5.60 (d,  $J = 2.8$  Hz, 1H), 5.44 (s, 1H), 2.53 (pd,  $J = 8.5$ , 2.9 Hz, 1H), 1.92 (ddt,  $J = 11.3$ , 7.8, 3.5 Hz, 2H), 1.74 (dq,  $J = 12.1$ , 7.3, 6.4 Hz, 1H), 1.62 (tdd,  $J = 12.7$ , 5.9, 2.6 Hz, 1H), 1.51 (dtd,  $J = 12.6$ , 7.9, 4.2 Hz, 2H), 1.45 – 1.33 (m, 1H), 0.96 (dtd,  $J = 11.8$ , 7.6, 4.4 Hz, 1H);  $^{13}\text{C NMR}$  (101 MHz, Chloroform-*d*)  $\delta$  161.1, 142.0, 133.3, 130.8, 129.5, 128.8, 127.3, 126.9, 125.3, 124.1, 123.3, 122.7, 122.1, 70.9, 46.2, 30.1, 26.1, 25.9, 24.7. HRMS (ESI)  $m/z$  calcd for  $\text{C}_{19}\text{H}_{20}\text{NO}$  ( $\text{M}+\text{H}$ ) $^+$  278.1539, found 278.1507.

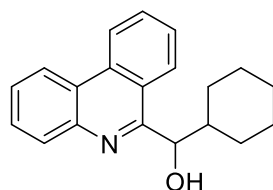

**cyclohexyl(phenanthridin-6-yl)methanol (4l)**<sup>9</sup>: yellow oil. Purification by preparative thin layer chromatography was performed (PE/EA: 10/1) to yield **4l** (14.0 mg, 24%) as a yellow oil;  $^1\text{H NMR}$  (400 MHz, Chloroform-*d*)  $\delta$  8.66 (d,  $J = 8.3$  Hz, 1H), 8.56 (d,  $J = 8.0$  Hz, 1H), 8.19 – 8.10 (m, 2H), 7.90 – 7.83 (m, 1H), 7.78 – 7.62 (m, 3H), 5.43 – 5.35 (m, 1H), 1.93 (dd,  $J = 14.7$ , 5.1 Hz, 2H), 1.83 (d,  $J = 12.9$  Hz, 1H), 1.72 (qd,  $J = 12.8$ , 3.4 Hz, 1H), 1.59 (d,  $J = 9.8$  Hz, 2H), 1.33 – 1.24 (m, 2H), 1.16 (dt,  $J = 13.0$ , 3.4 Hz, 1H), 1.04 (d,  $J = 13.2$  Hz, 1H), 0.95 (dt,  $J = 12.3$ , 3.2 Hz, 1H);  $^{13}\text{C NMR}$  (101 MHz, Chloroform-*d*)  $\delta$  160.6, 141.9, 133.2, 130.8, 129.5, 128.9, 127.4, 126.9, 125.4, 124.0, 123.5, 122.8, 122.1, 73.6, 44.9, 31.2, 26.8, 26.3, 26., 25.1.

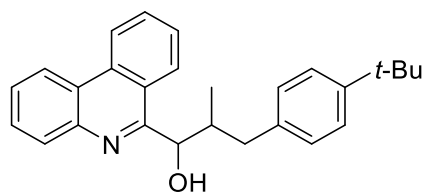

**3-(4-(tert-butyl)phenyl)-2-methyl-1-(phenanthridin-6-yl)propan-1-ol (4m)**: yellow oil. Purification by preparative thin layer chromatography was performed (PE/EA: 10/1) to yield **4m** (19.2 mg, 25%) as a yellow oil;  $^1\text{H NMR}$  (400 MHz, Chloroform-*d*)  $\delta$  8.63 (d,  $J = 8.3$  Hz, 1H), 8.53 (d,  $J = 8.3$  Hz, 1H), 8.16 (d,  $J = 8.9$  Hz, 1H), 8.12 (d,  $J = 8.2$  Hz, 1H), 7.90 – 7.81 (m, 1H), 7.80 –

7.63 (m, 3H), 6.91 (d,  $J = 8.3$  Hz, 2H), 6.64 (d,  $J = 8.2$  Hz, 2H), 5.52 (d,  $J = 2.4$  Hz, 1H), 2.54 (tdd,  $J = 11.2, 5.7, 3.4$  Hz, 1H), 2.49 – 2.31 (m, 2H), 1.29 (s, 3H), 1.14 (s, 9H);  $^{13}\text{C}$  NMR (101 MHz, Chloroform- $d$ )  $\delta$  160.3, 147.9, 141.8, 137.6, 133.2, 130.8, 129.5, 128.9, 128.5, 127.3, 127.0, 125.2, 124.5, 124.1, 123.5, 122.8, 122.1, 73.7, 41.8, 35.1, 34.1, 31.3, 18.4. HRMS (ESI)  $m/z$  calcd for  $\text{C}_{27}\text{H}_{30}\text{NO}$  (M+H) $^{+}$  384.2322, found 384.2323.

## 8. Reference

1. Q. Wang, X. Dong, T. Xiao and L. Zhou, *Org. Lett.*, 2013, **15**, 4846-4849.
2. Q. Li, C. Y. Zhou and C. Wang, *Org. Lett.*, 2022, **24**, 7654-7658.
3. J. Rong, L. Deng, P. Tan, C. Ni, Y. Gu, J. Hu, *Angew. Chem., Int. Ed.*, 2016, **55**, 2743-2747.
4. H. Y. Wu, Z. Cao, S. Q. Li, Y. W. Fu, J. M. Li, X. H. Li, C. M. He and J. Y. Chen, *J. Org. Chem.*, 2023, **88**, 17322-17329.
5. W. Wan, G. Ma, J. Li, Y. Chen, Q. Hu, M. Li, H. Jiang, H. Deng and J. Hao, *Chem. Commun.*, 2016, **52**, 1598-1601.
6. M. Lübbesmeyer, D. Leifert, H. Schäfer and A. Studer, *Chem. Commun.*, 2018, **54**, 2240-2243.
7. T. Zhang, M. Yu and H. Huang, *Chem. Sci.*, 2021, **12**, 10501-10505.
8. X. Y. Zhang, W. Z. Weng, H. Liang, H. Yang and B. Zhang, *Org. Lett.*, 2018, **20**, 4686-4690.
9. H. T. Ji, Q. H. Peng, J. S. Wang, Y. H. Lu, H. Dai, Q. X. Luo and W. M. He, *Green Chem.*, 2024, **26**, 12084-12089.
10. C. A. Correia, L. Yang and C. J. Li, *Org. Lett.*, 2011, **13**, 4581-4583.

## 9. NMR Spectra

$^1\text{H}$  NMR (400 MHz,  $\text{CDCl}_3$ ),  $^{13}\text{C}$  NMR (100 MHz,  $\text{CDCl}_3$ ) spectra of product **3a**

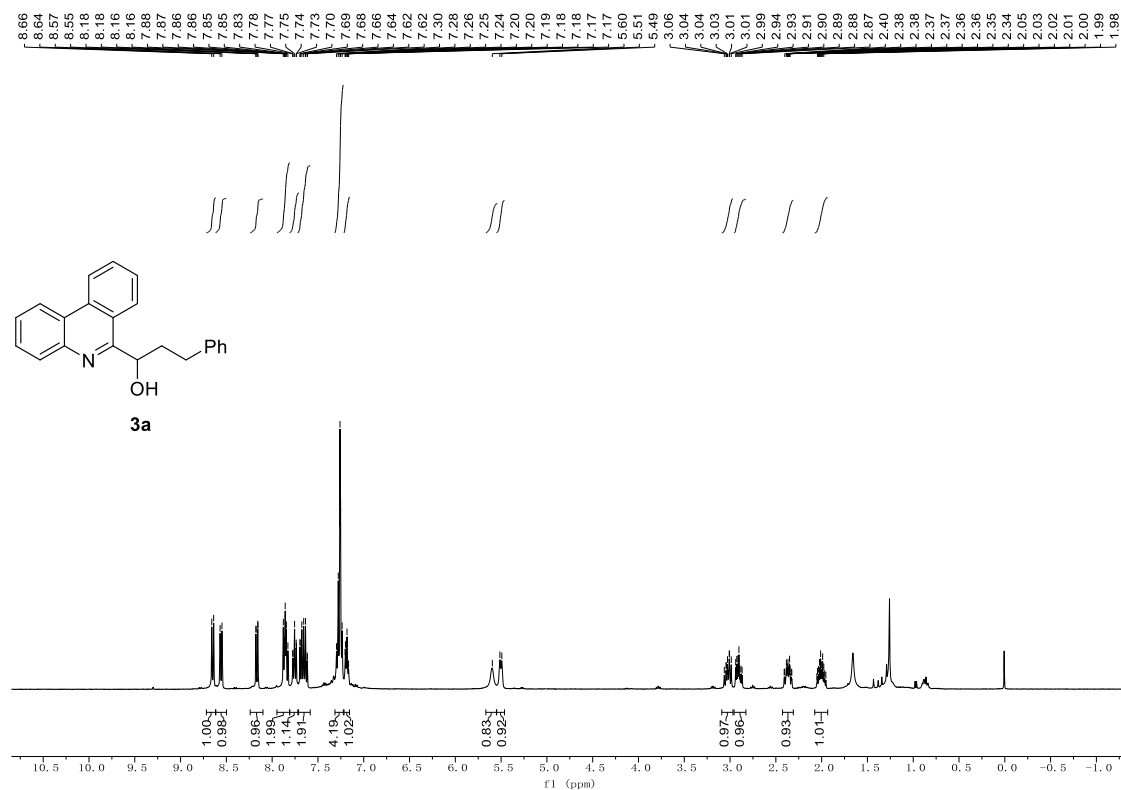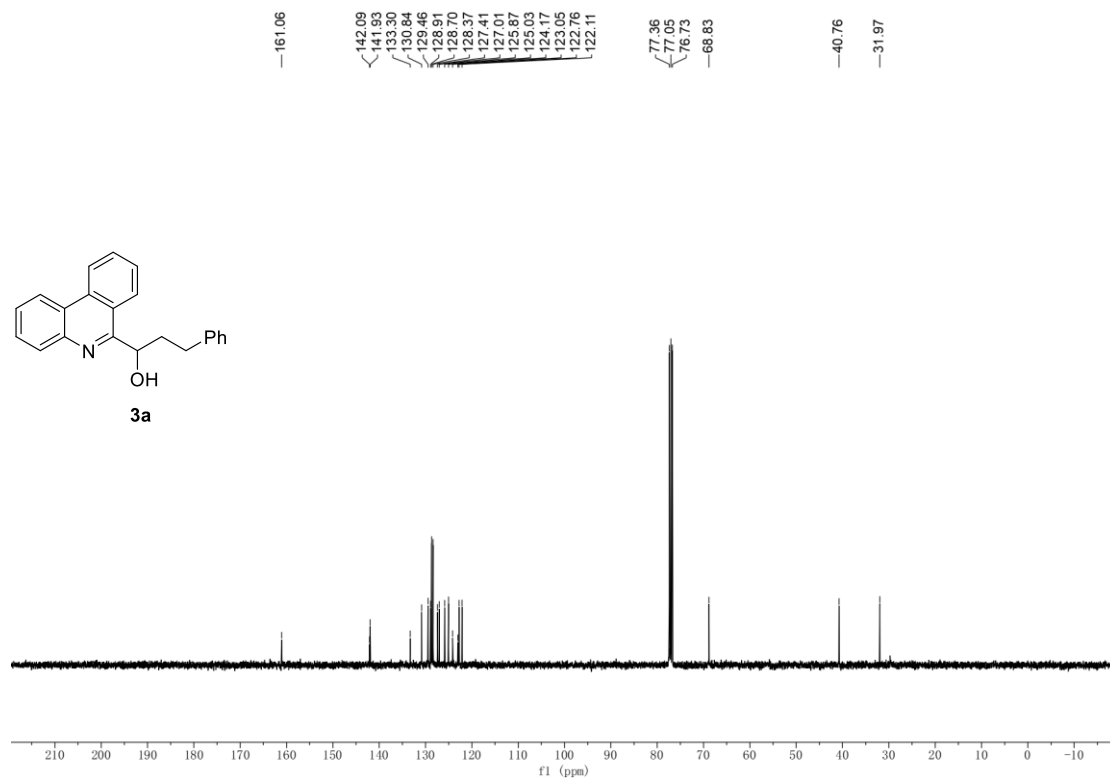



<sup>1</sup>H NMR (400 MHz, CDCl<sub>3</sub>), <sup>13</sup>C NMR (100 MHz, CDCl<sub>3</sub>) spectra of product 3b

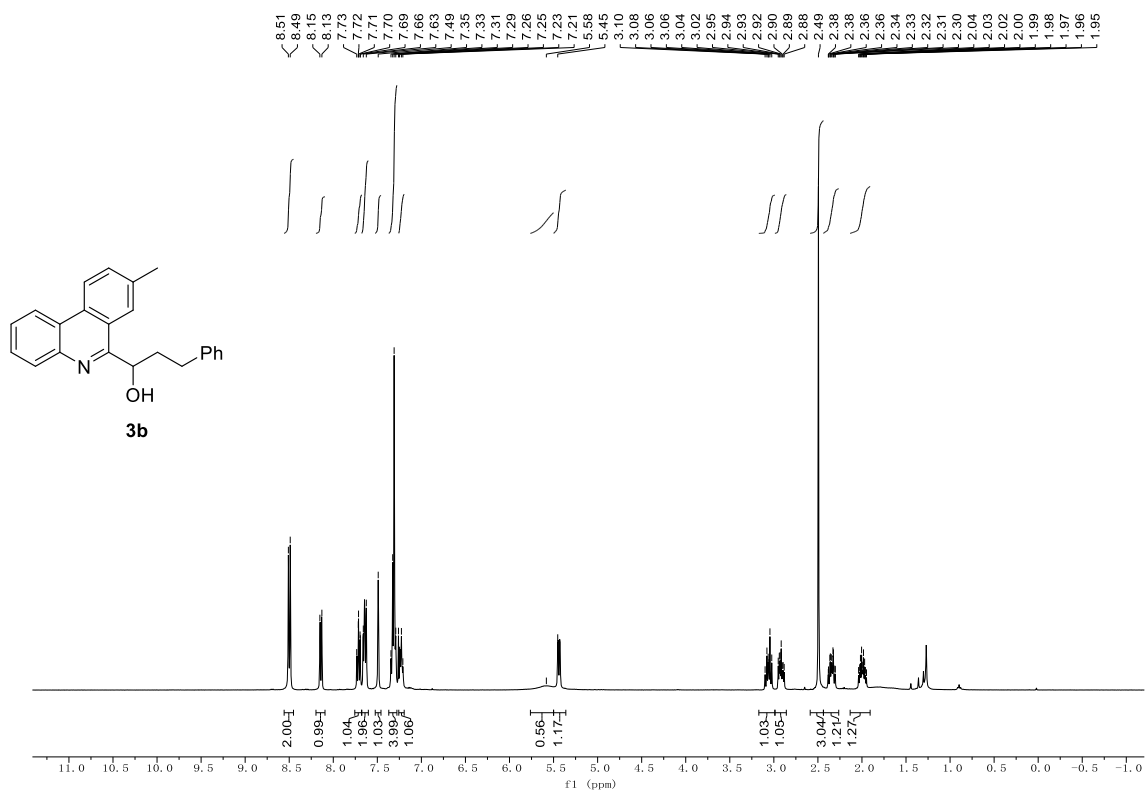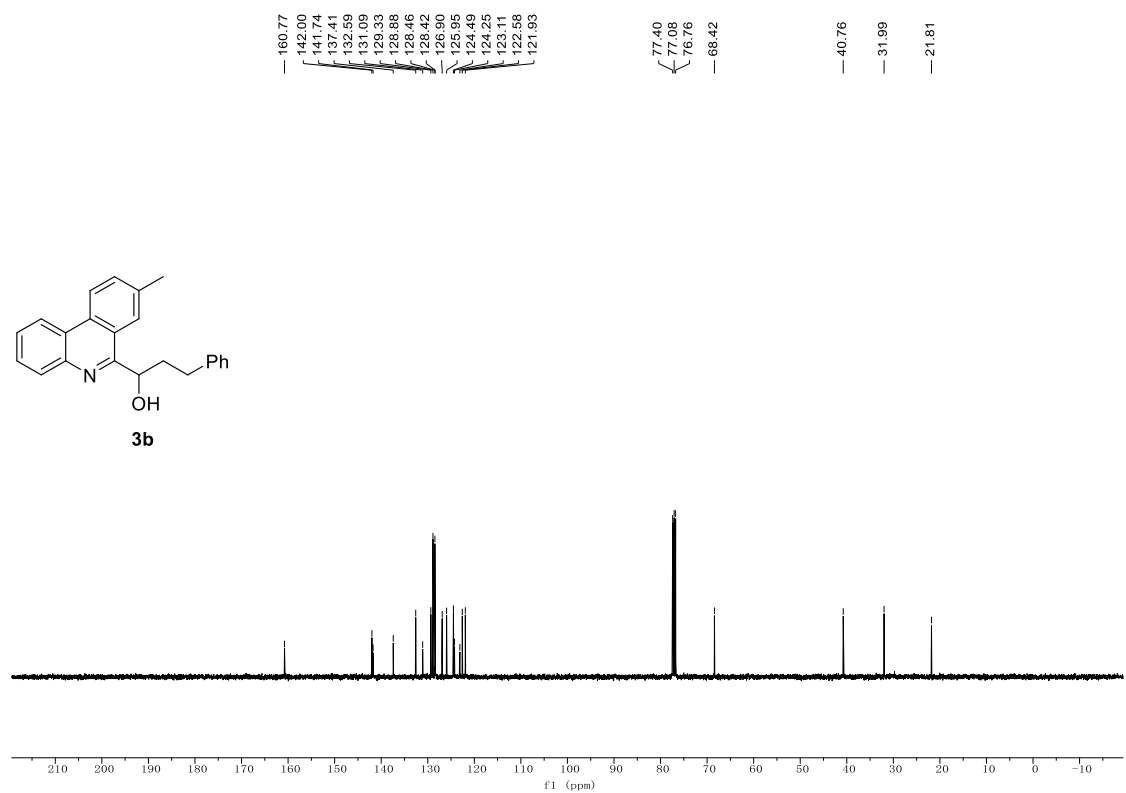

<sup>1</sup>H NMR (400 MHz, CDCl<sub>3</sub>), <sup>13</sup>C NMR (100 MHz, CDCl<sub>3</sub>) spectra of product **3c**

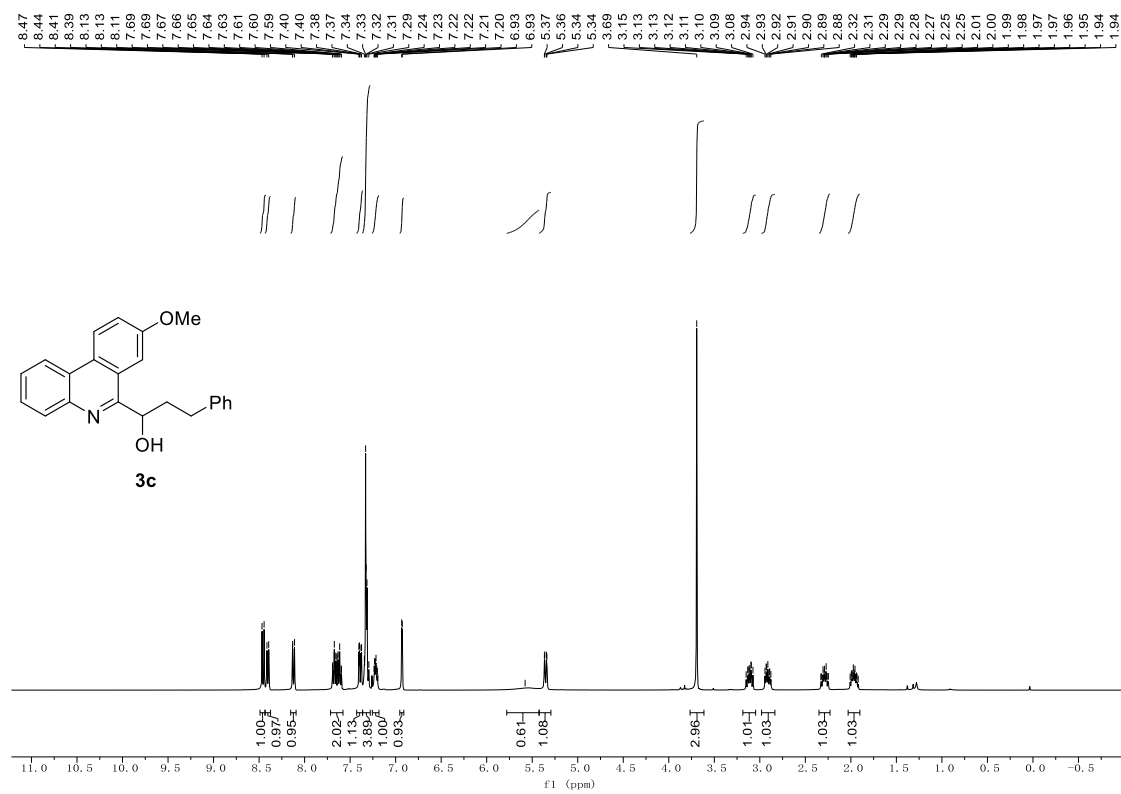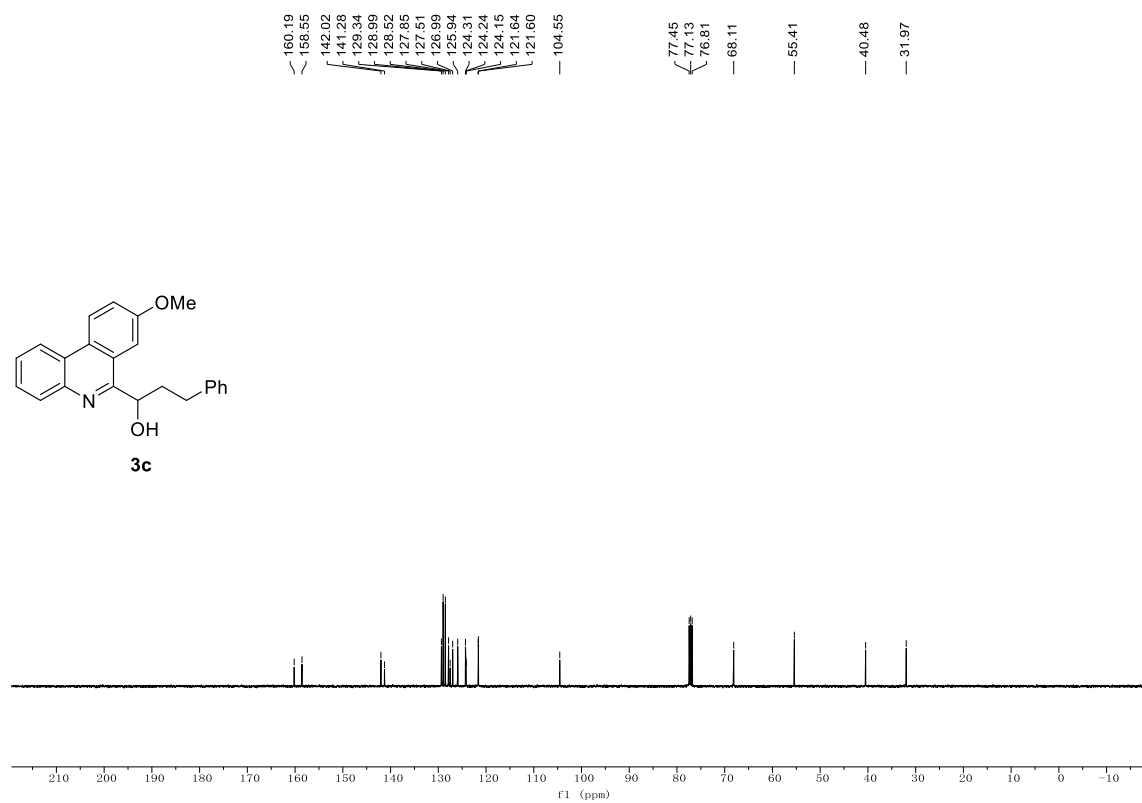

<sup>1</sup>H NMR (400 MHz, CDCl<sub>3</sub>), <sup>13</sup>C NMR (100 MHz, CDCl<sub>3</sub>) spectra of product 3d

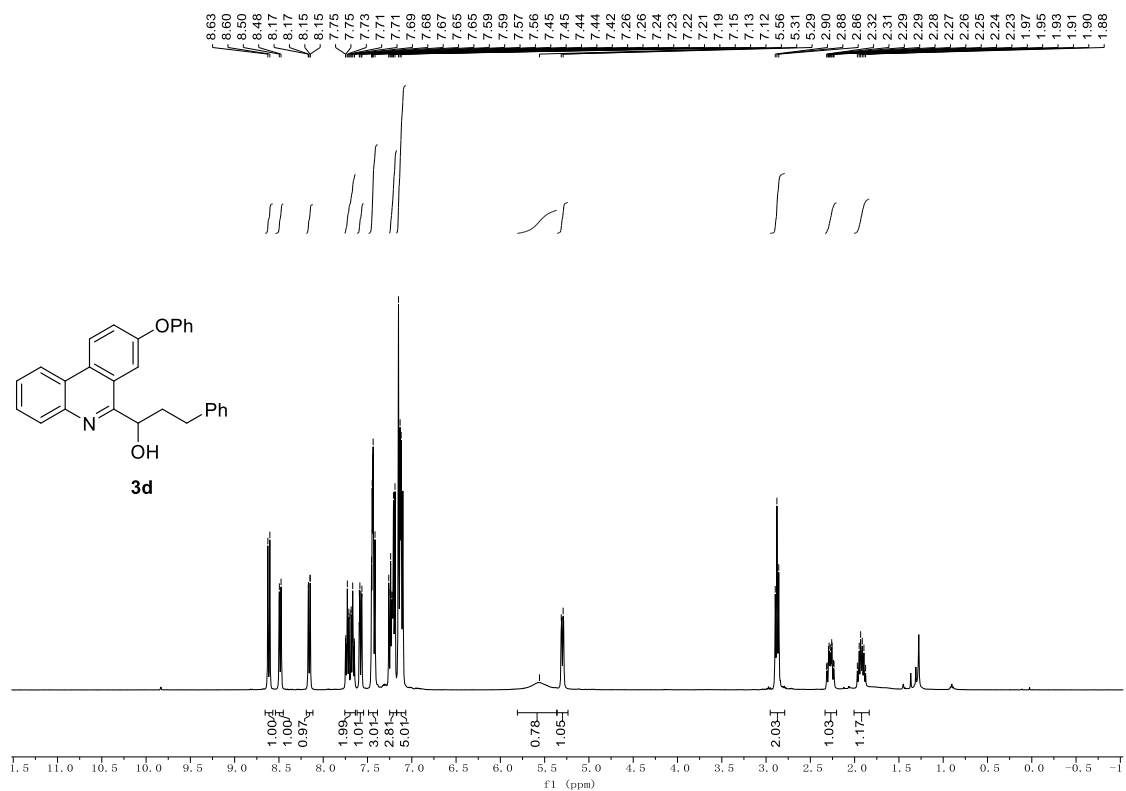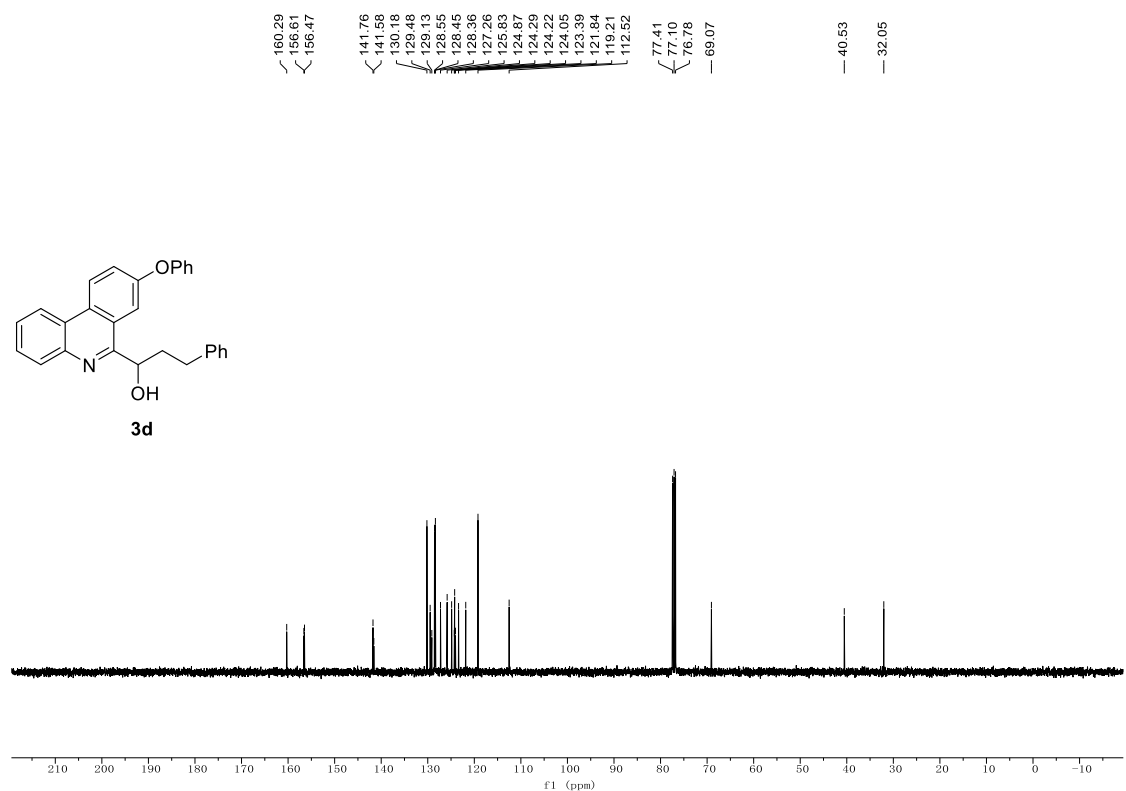

<sup>1</sup>H NMR (400 MHz, CDCl<sub>3</sub>), <sup>13</sup>C NMR (100 MHz, CDCl<sub>3</sub>) spectra of product 3e

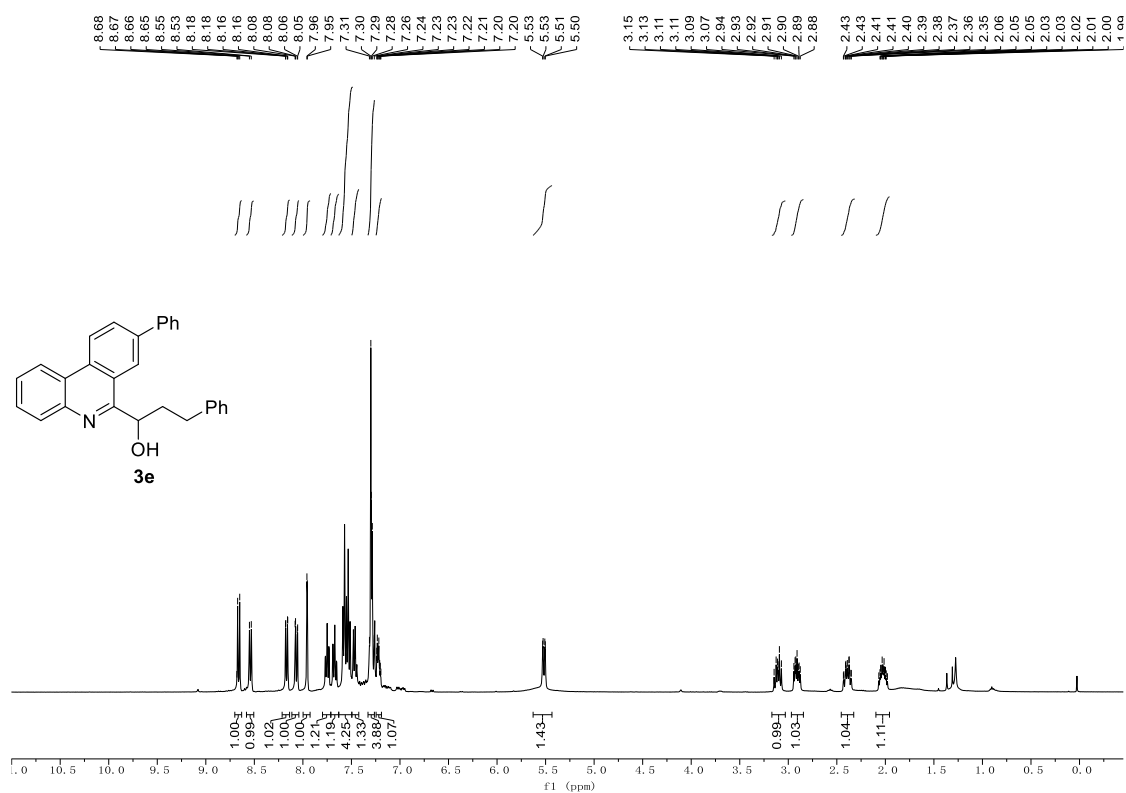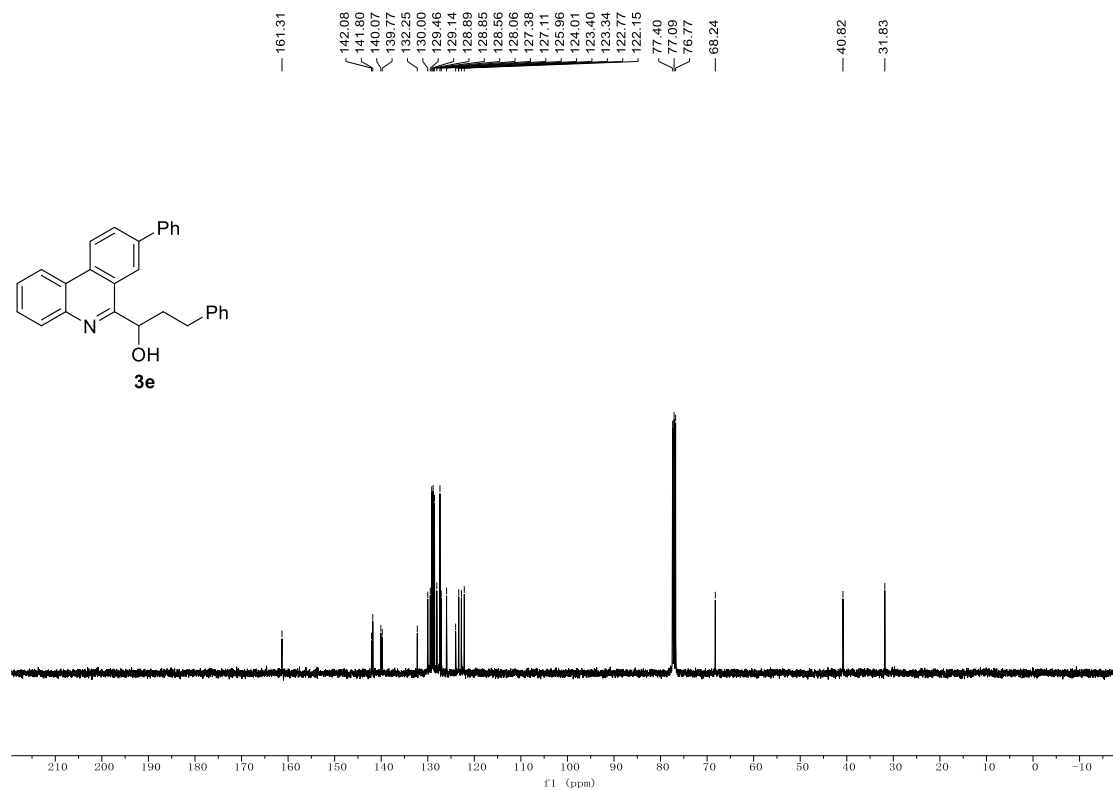

<sup>1</sup>H NMR (400 MHz, CDCl<sub>3</sub>), <sup>13</sup>C NMR (100 MHz, CDCl<sub>3</sub>) spectra of product 3f

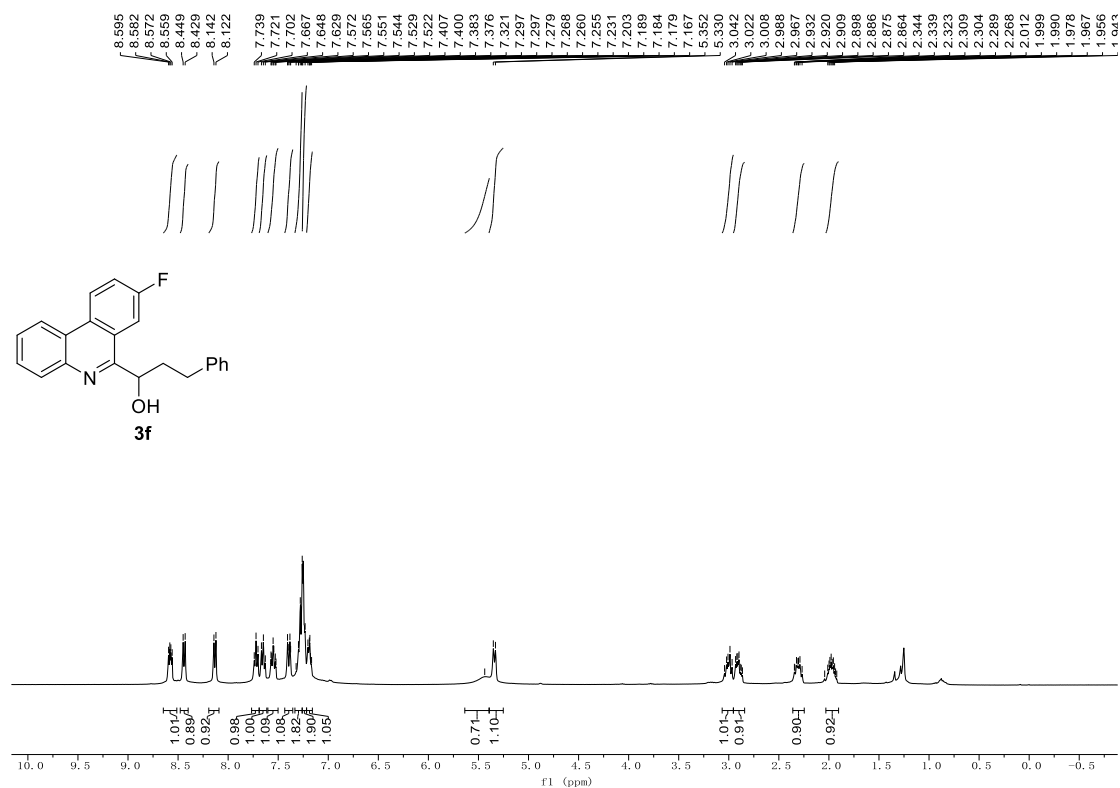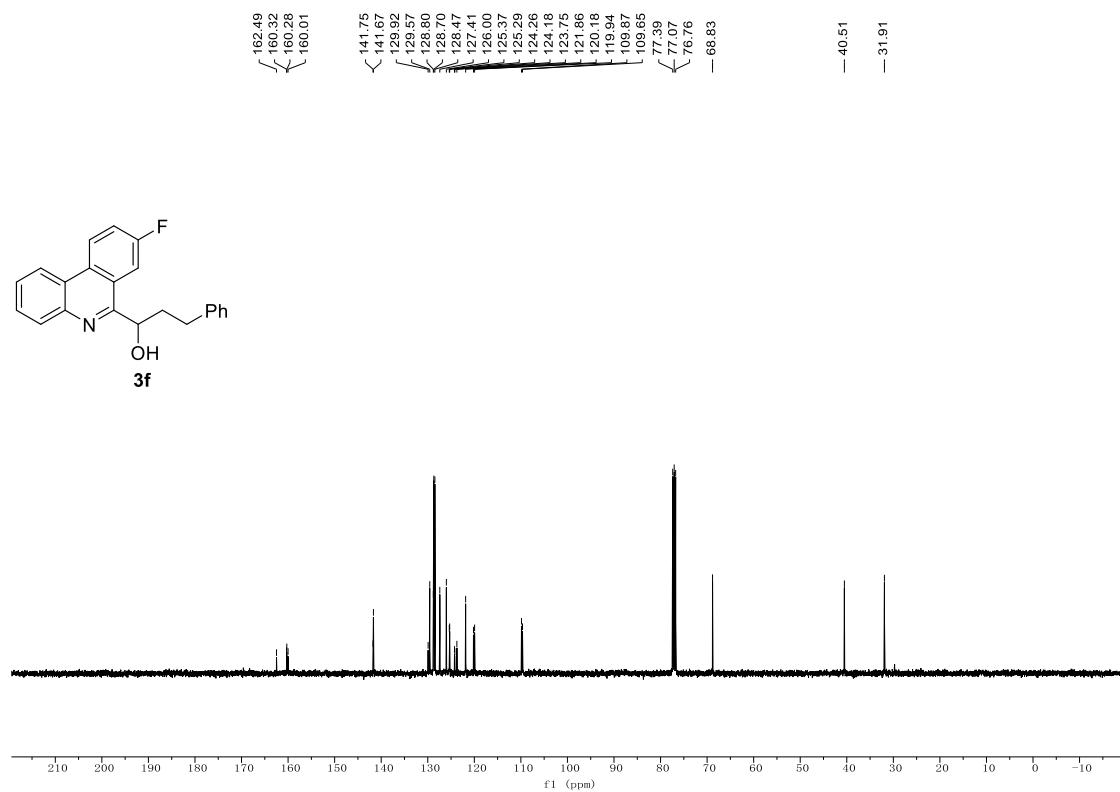

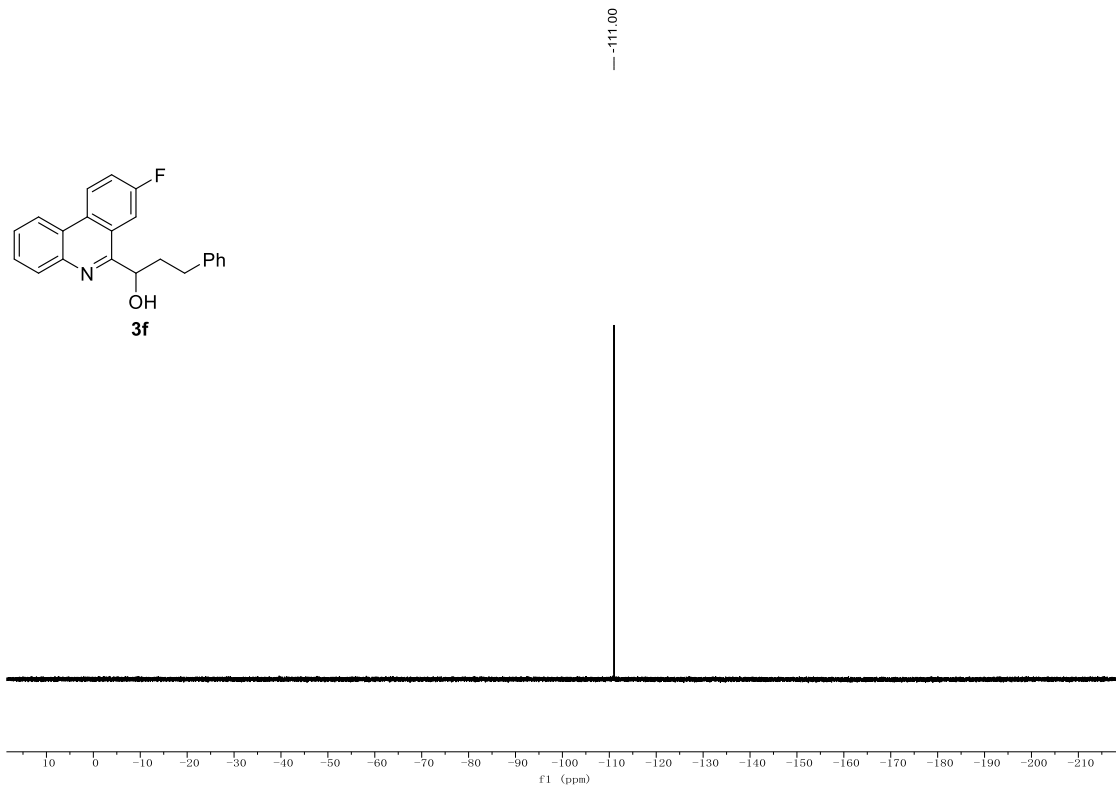

**<sup>1</sup>H NMR (400 MHz, CDCl<sub>3</sub>), <sup>13</sup>C NMR (100 MHz, CDCl<sub>3</sub>) spectra of product 3g**

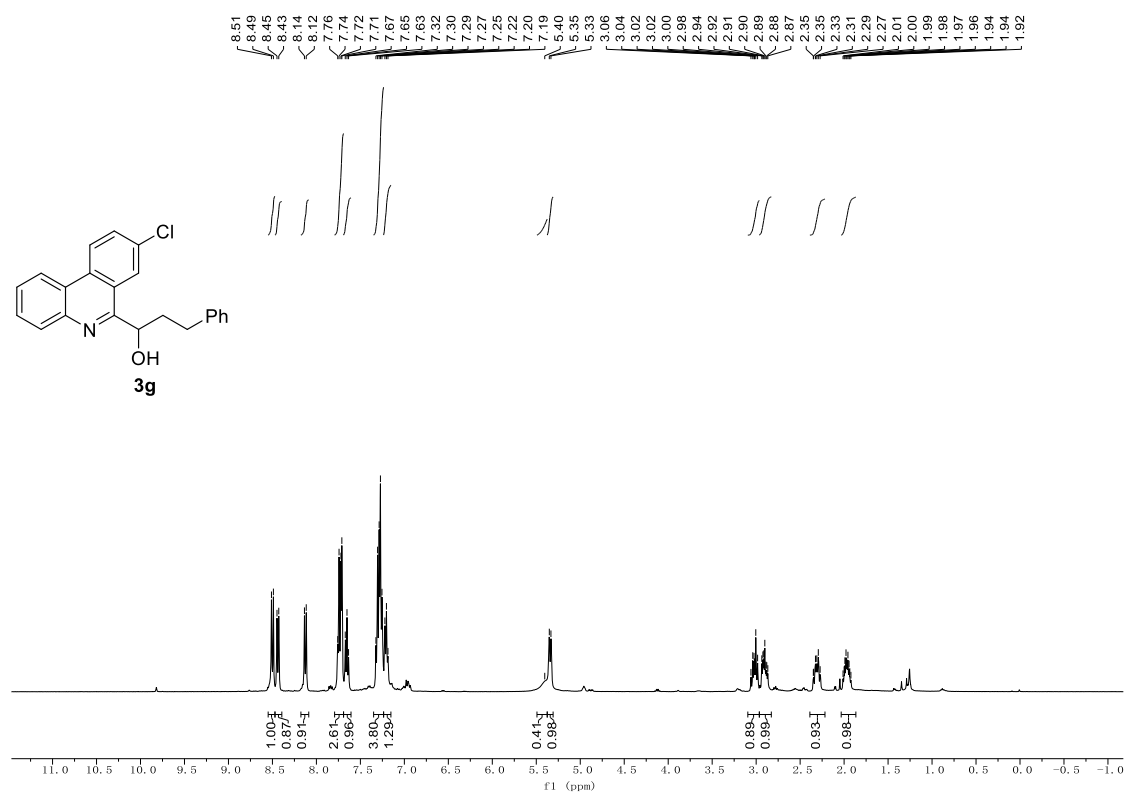

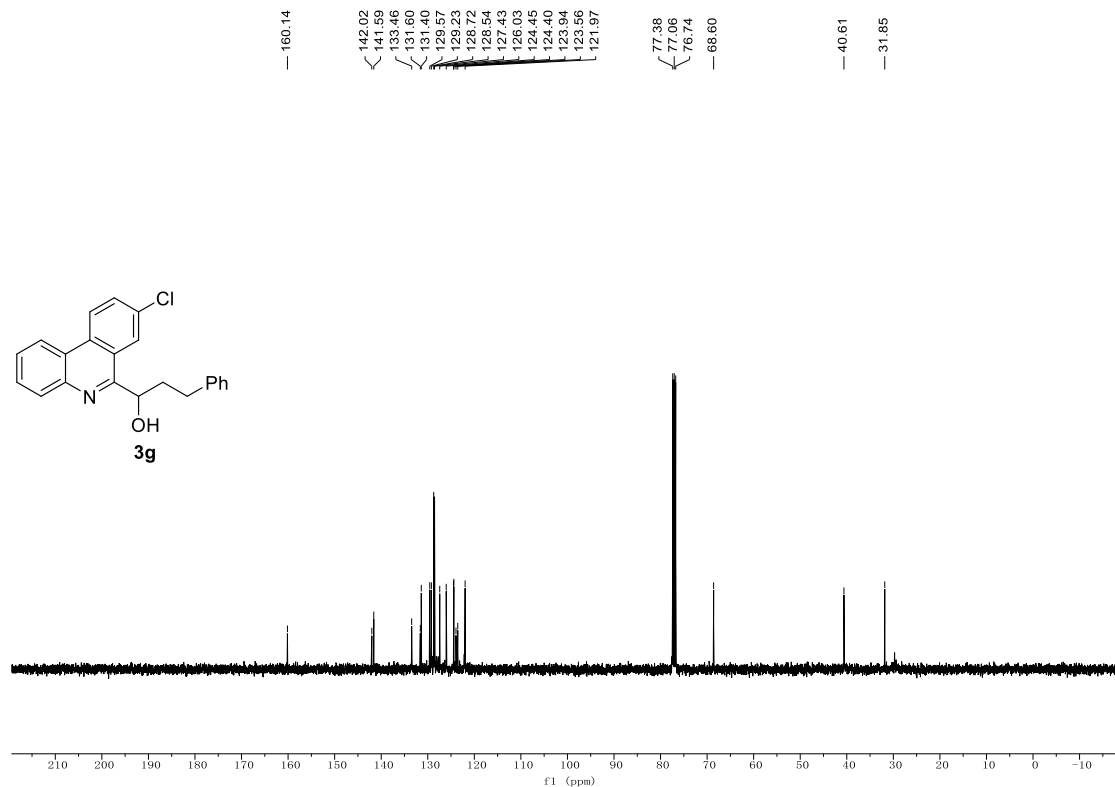

$^1\text{H}$  NMR (400 MHz,  $\text{CDCl}_3$ ),  $^{13}\text{C}$  NMR (100 MHz,  $\text{CDCl}_3$ ) spectra of product **3h**

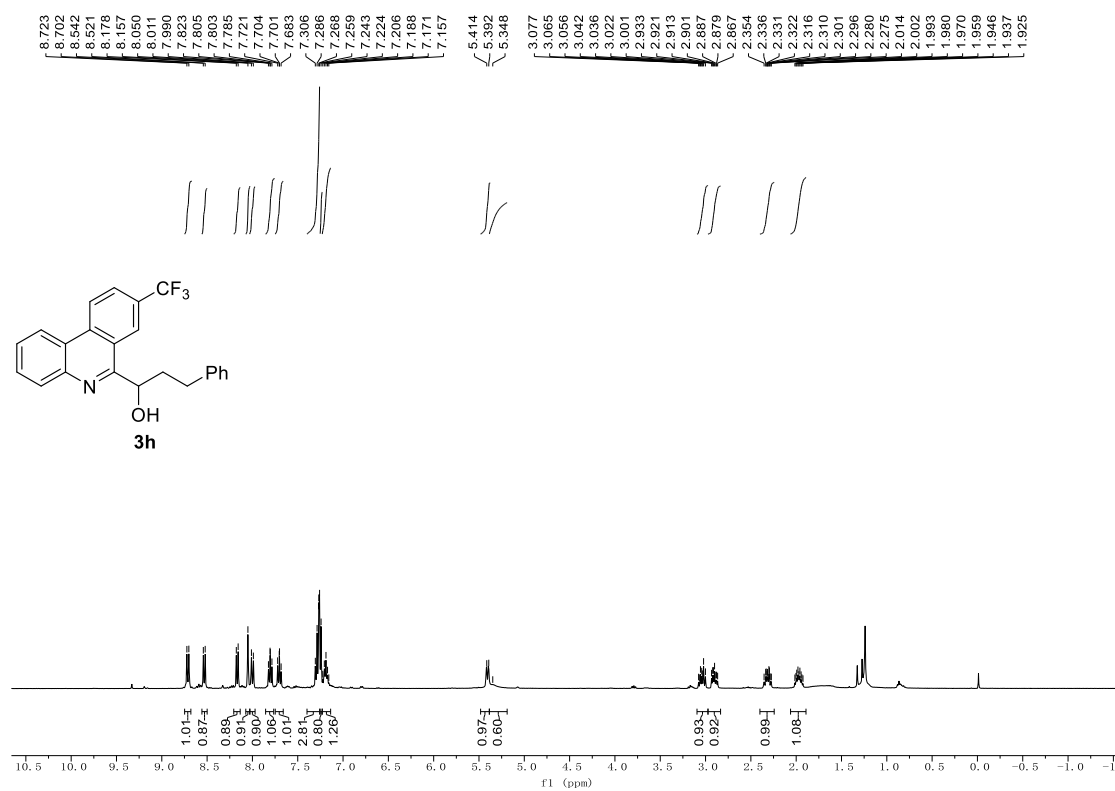

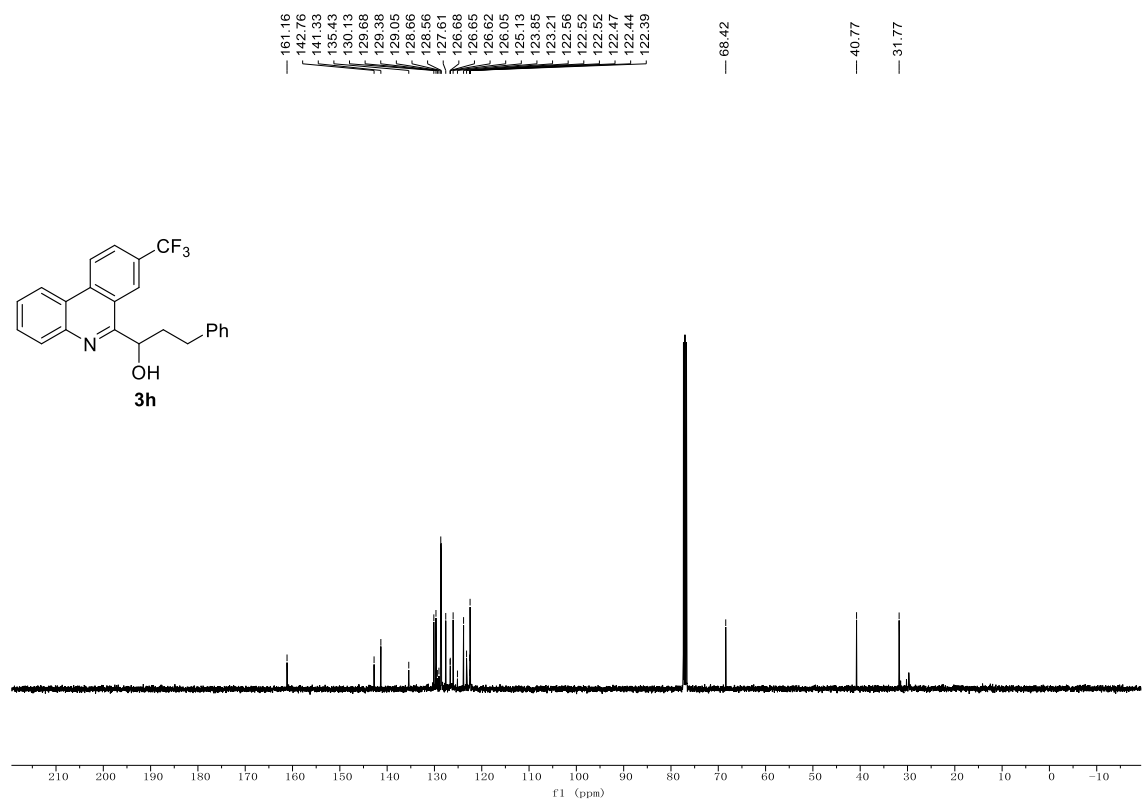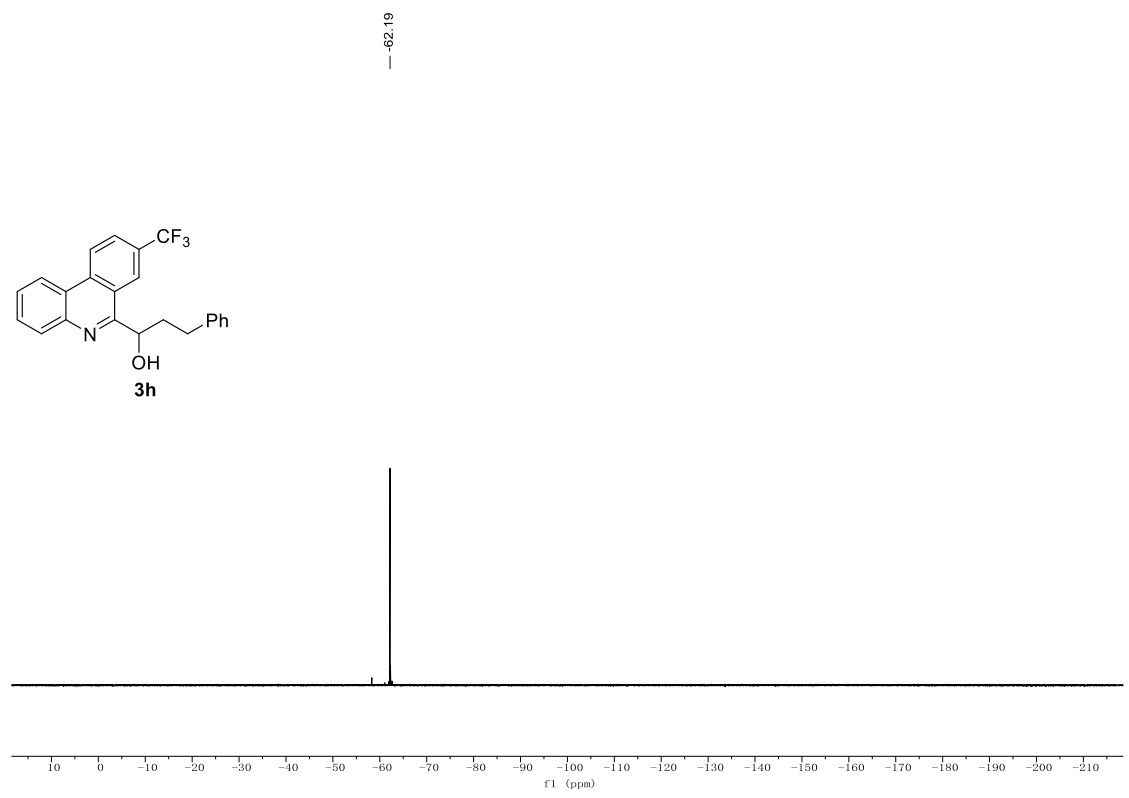



**<sup>1</sup>H NMR (400 MHz, CDCl<sub>3</sub>), <sup>13</sup>C NMR (100 MHz, CDCl<sub>3</sub>) spectra of product 3i**

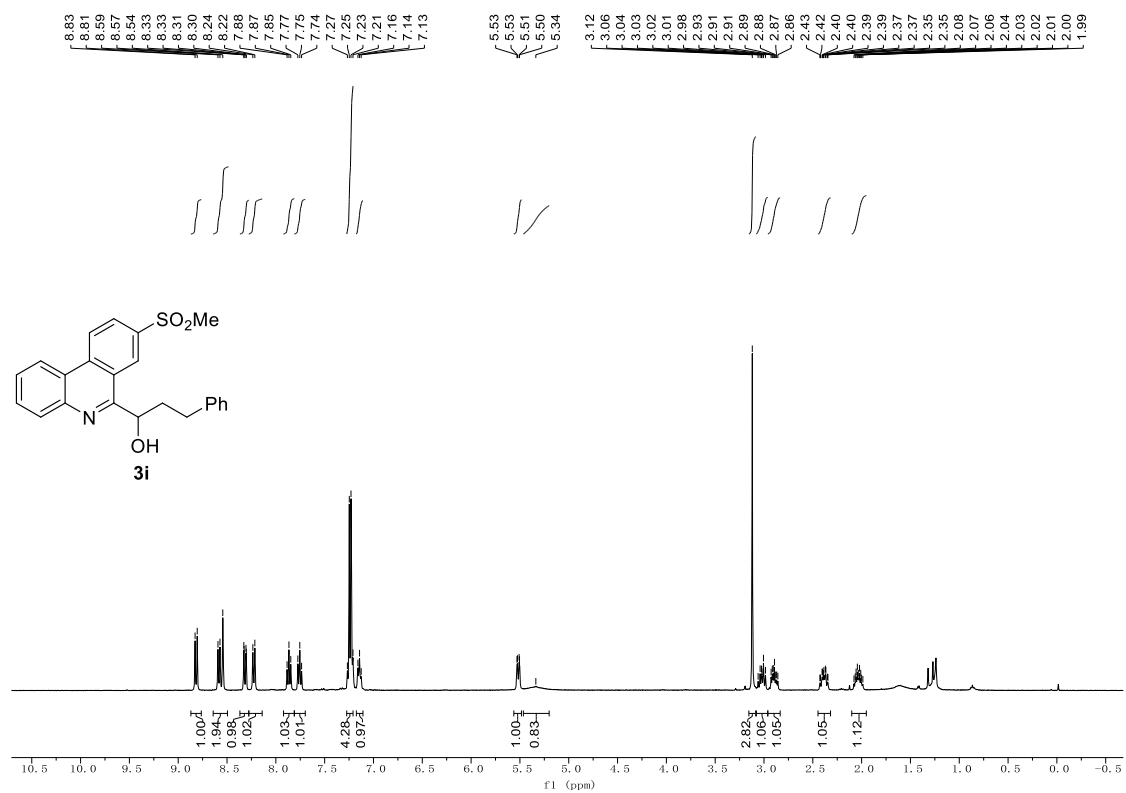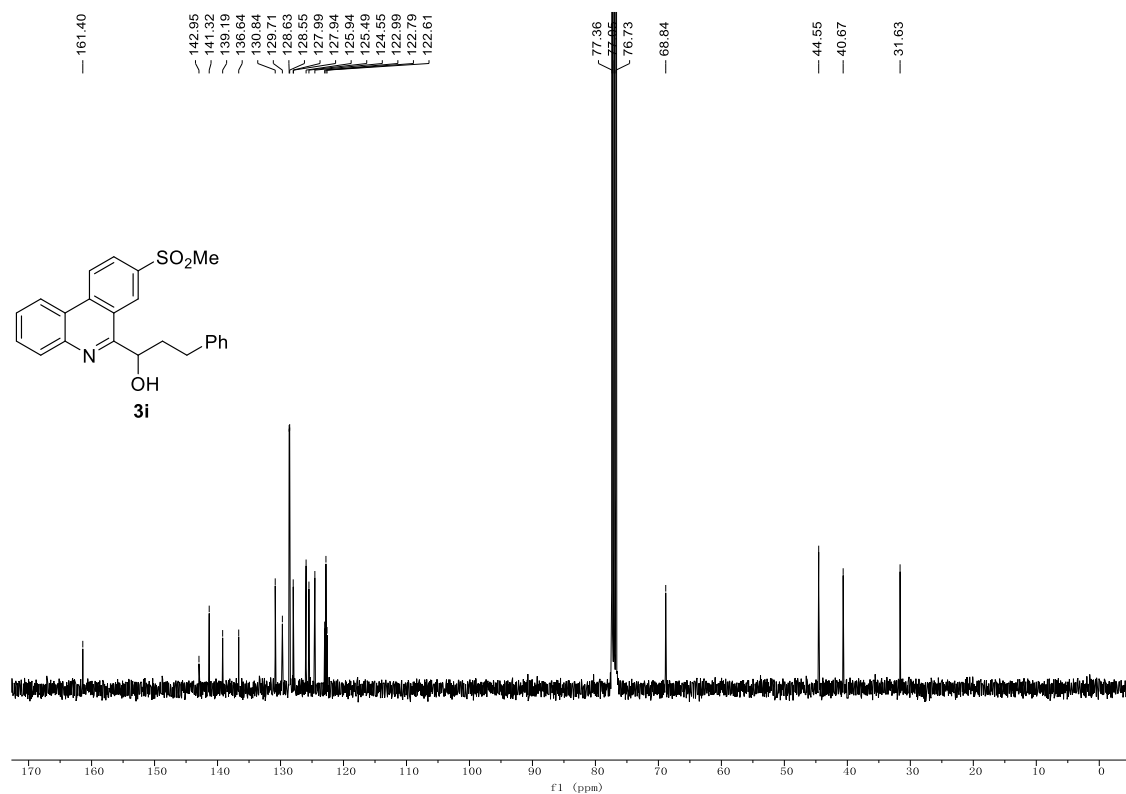

**<sup>1</sup>H NMR (400 MHz, CDCl<sub>3</sub>), <sup>13</sup>C NMR (100 MHz, CDCl<sub>3</sub>) spectra of product 3j**

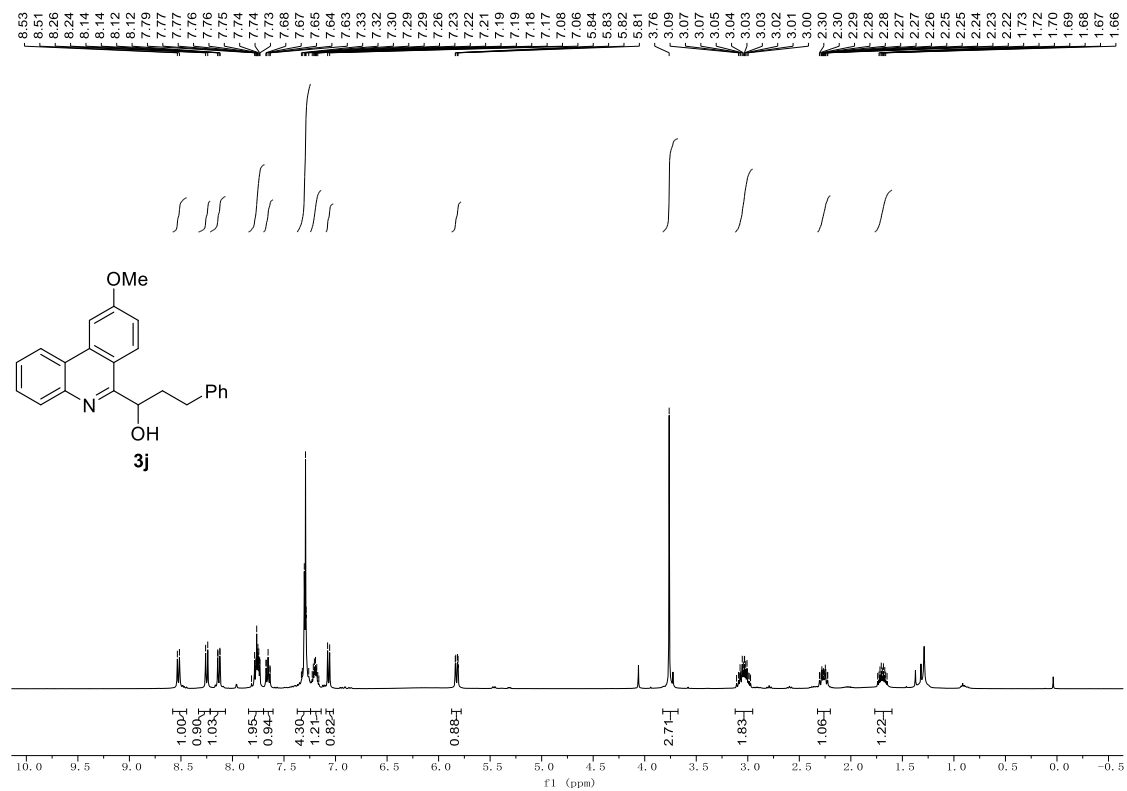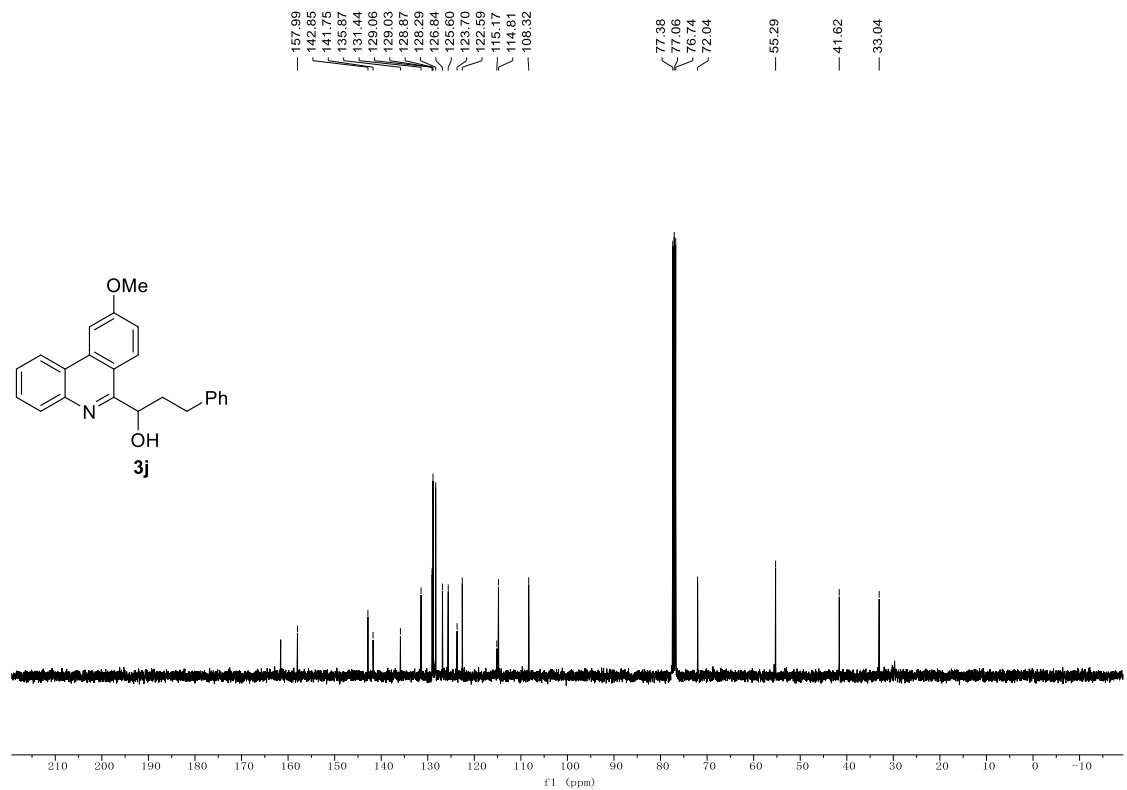

**<sup>1</sup>H NMR (400 MHz, CDCl<sub>3</sub>), <sup>13</sup>C NMR (100 MHz, CDCl<sub>3</sub>) spectra of product 3k**

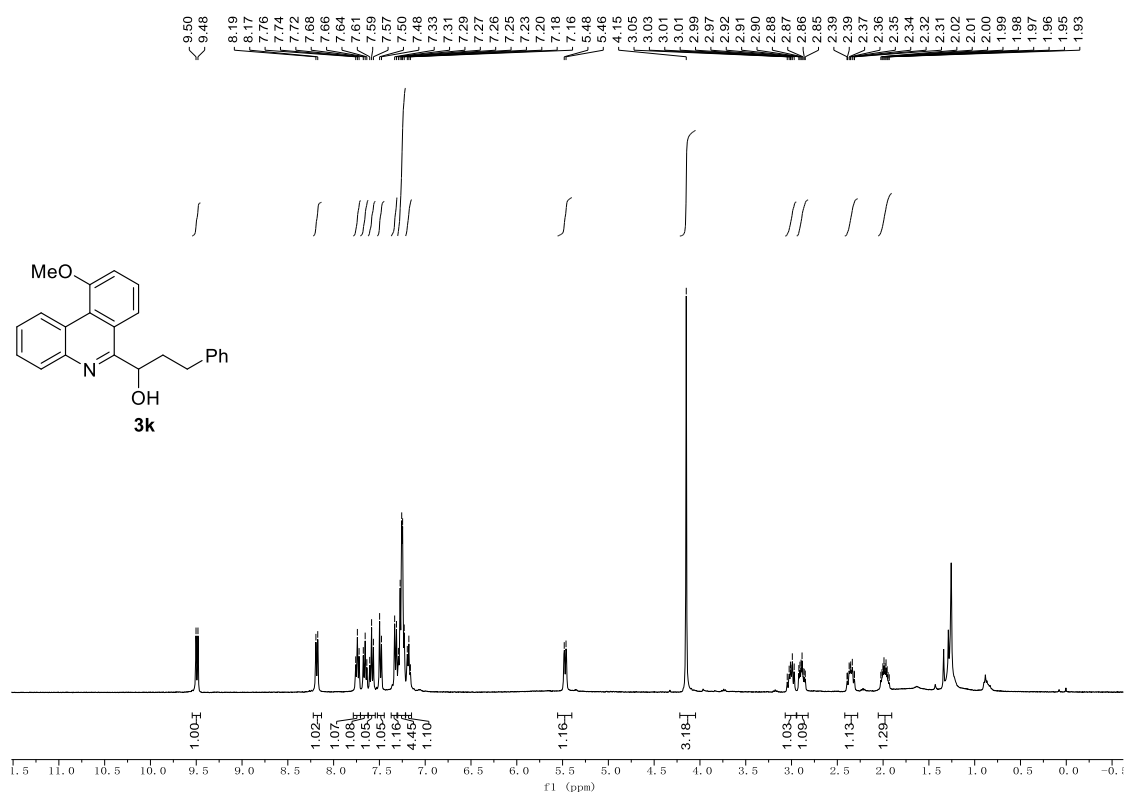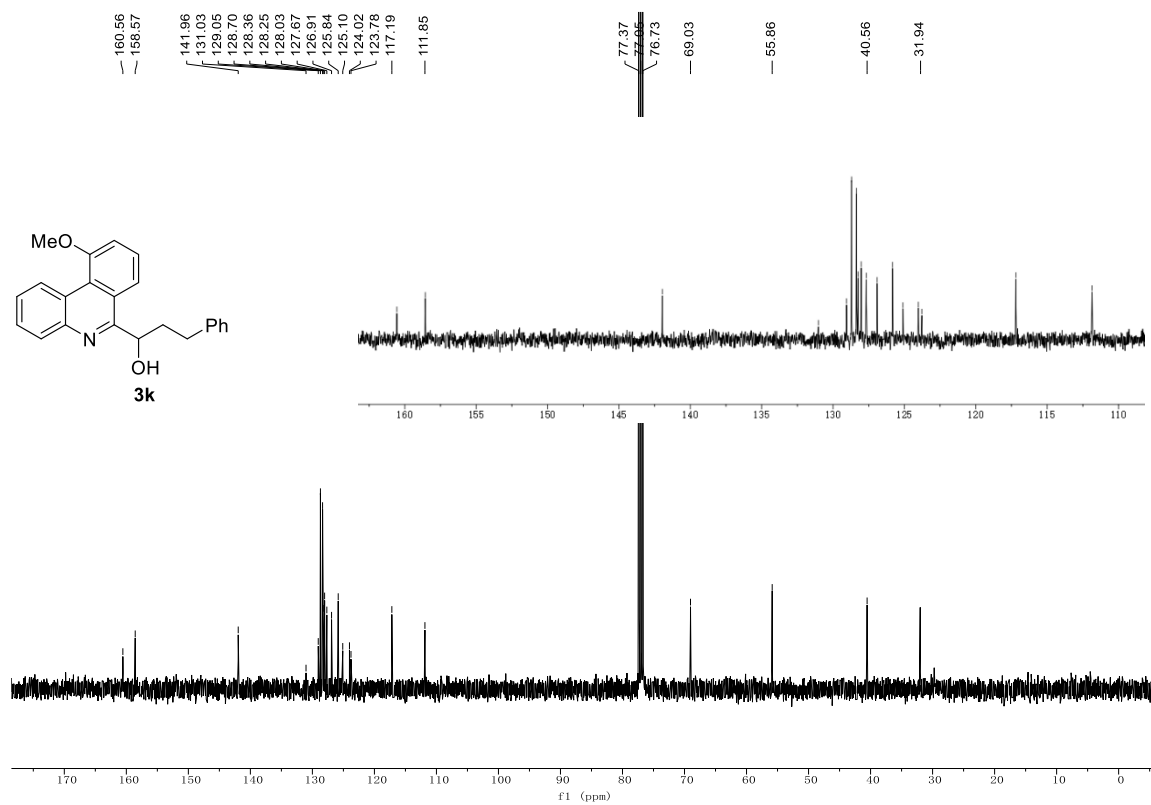

**<sup>1</sup>H NMR (400 MHz, CDCl<sub>3</sub>), <sup>13</sup>C NMR (100 MHz, CDCl<sub>3</sub>) spectra of product 31**

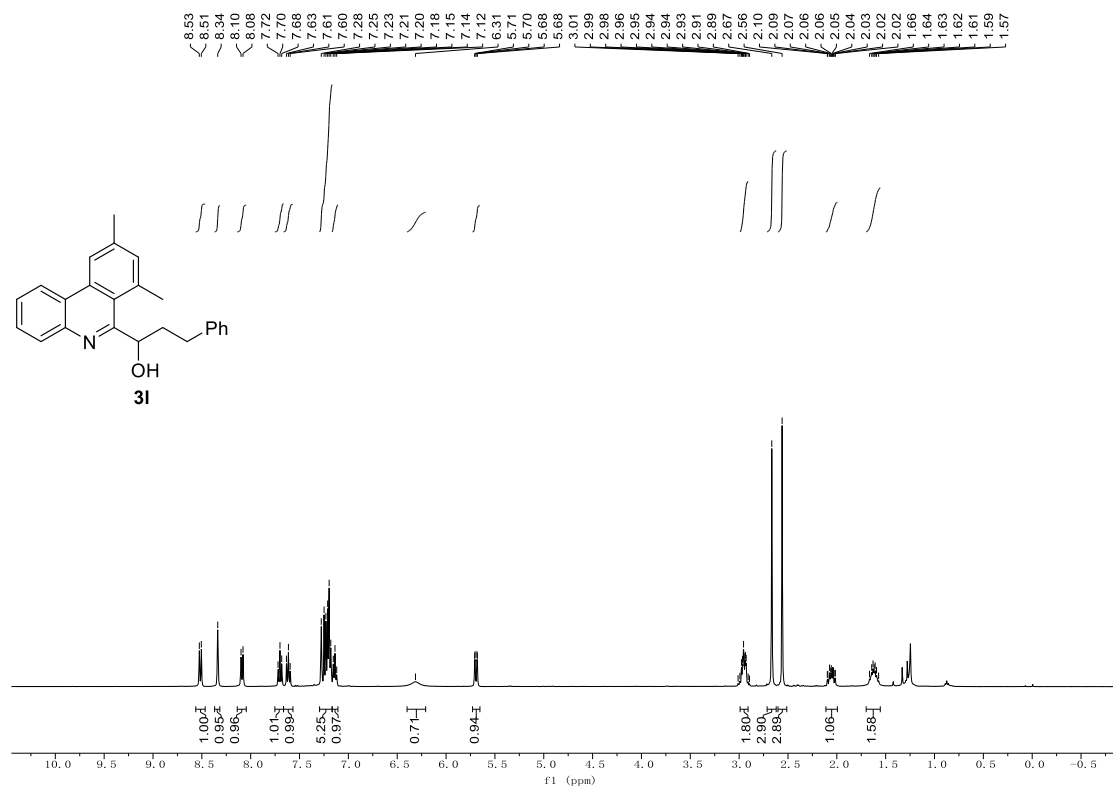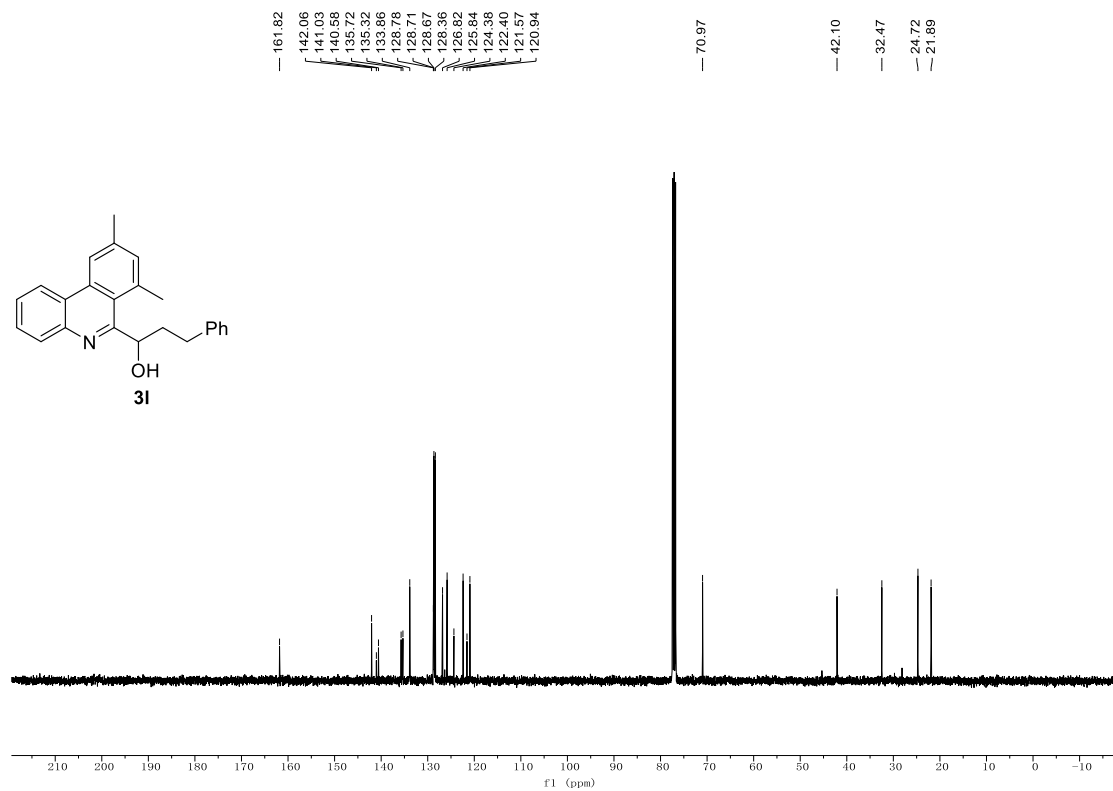

<sup>1</sup>H NMR (400 MHz, CDCl<sub>3</sub>), <sup>13</sup>C NMR (100 MHz, CDCl<sub>3</sub>) spectra of product 3m

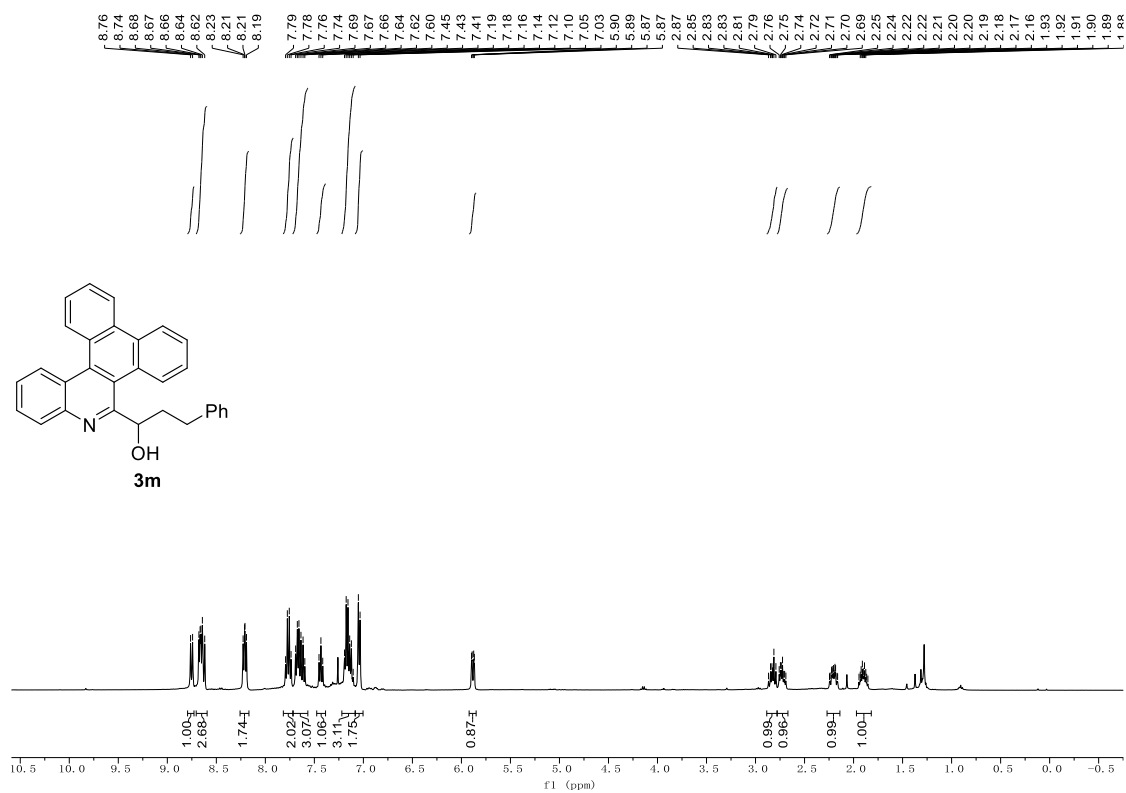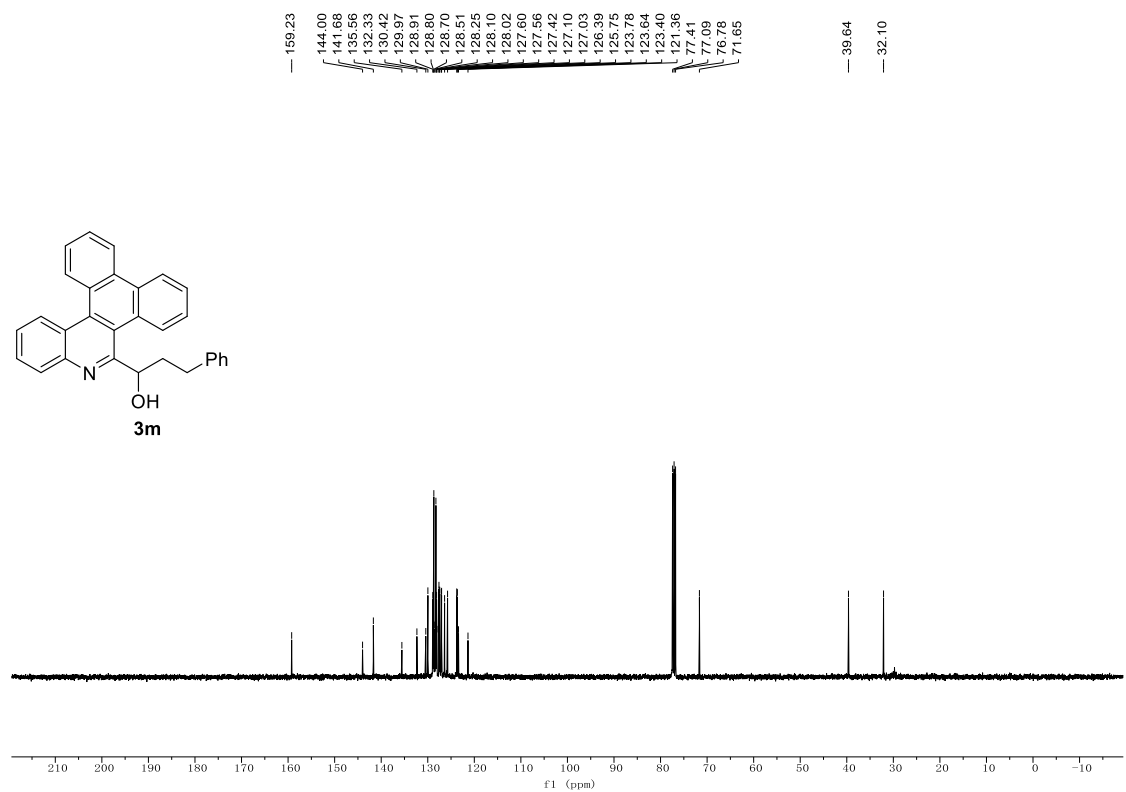

**<sup>1</sup>H NMR (400 MHz, CDCl<sub>3</sub>), <sup>13</sup>C NMR (100 MHz, CDCl<sub>3</sub>) spectra of product 3n**

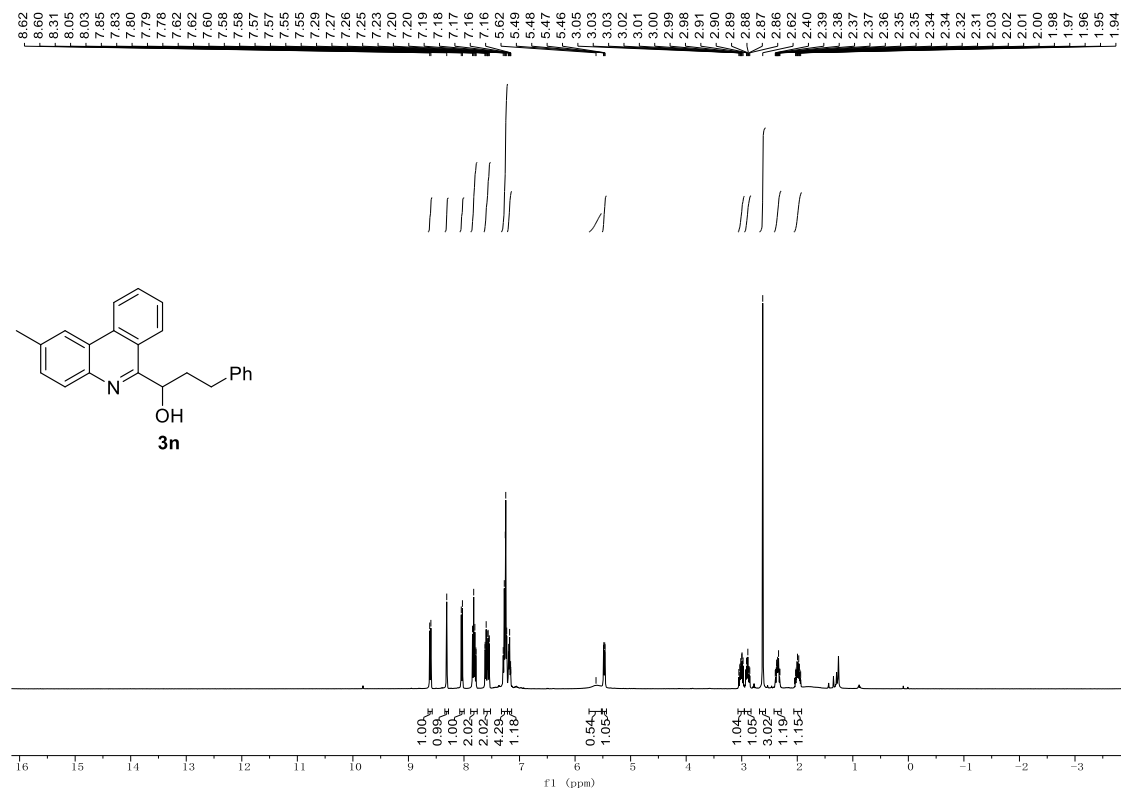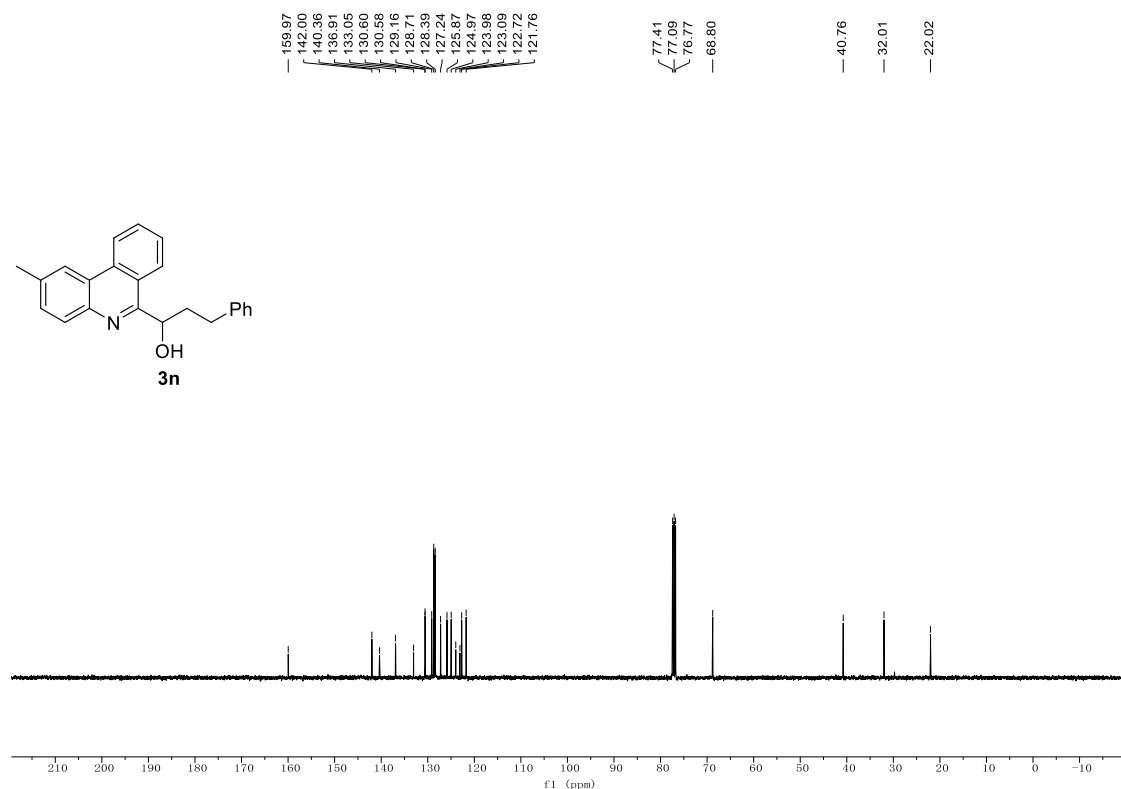

**<sup>1</sup>H NMR (400 MHz, CDCl<sub>3</sub>), <sup>13</sup>C NMR (100 MHz, CDCl<sub>3</sub>) spectra of product 3o**

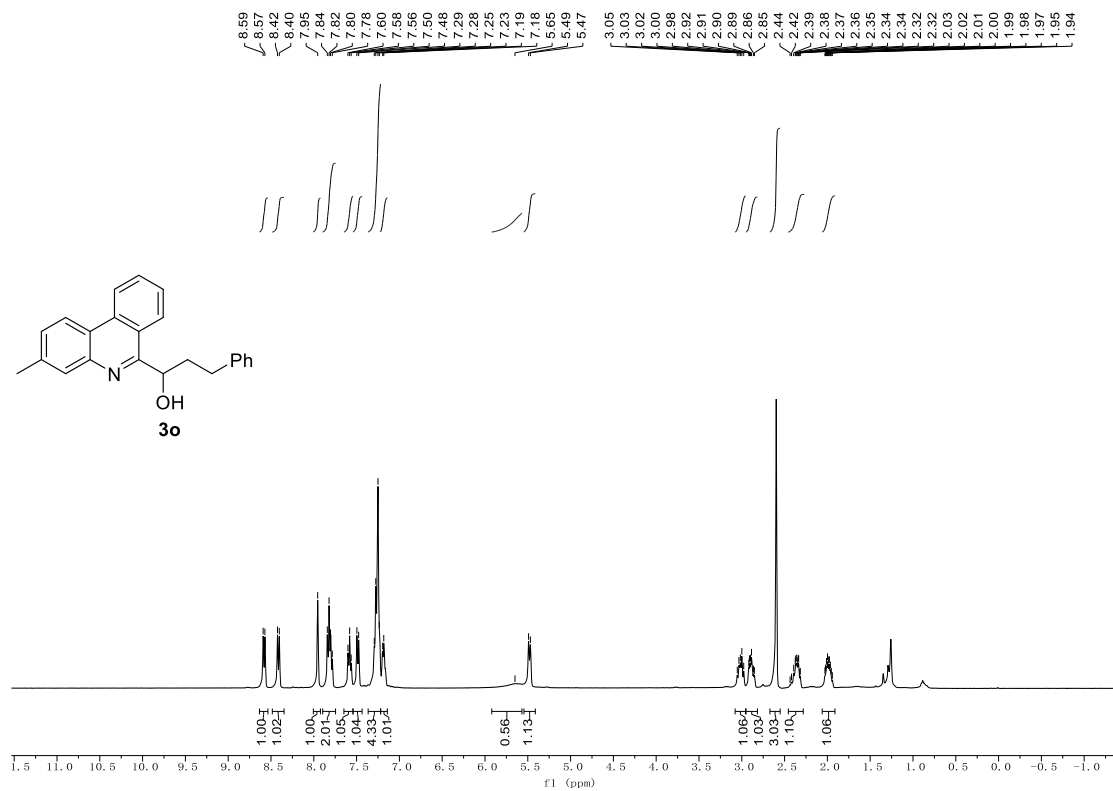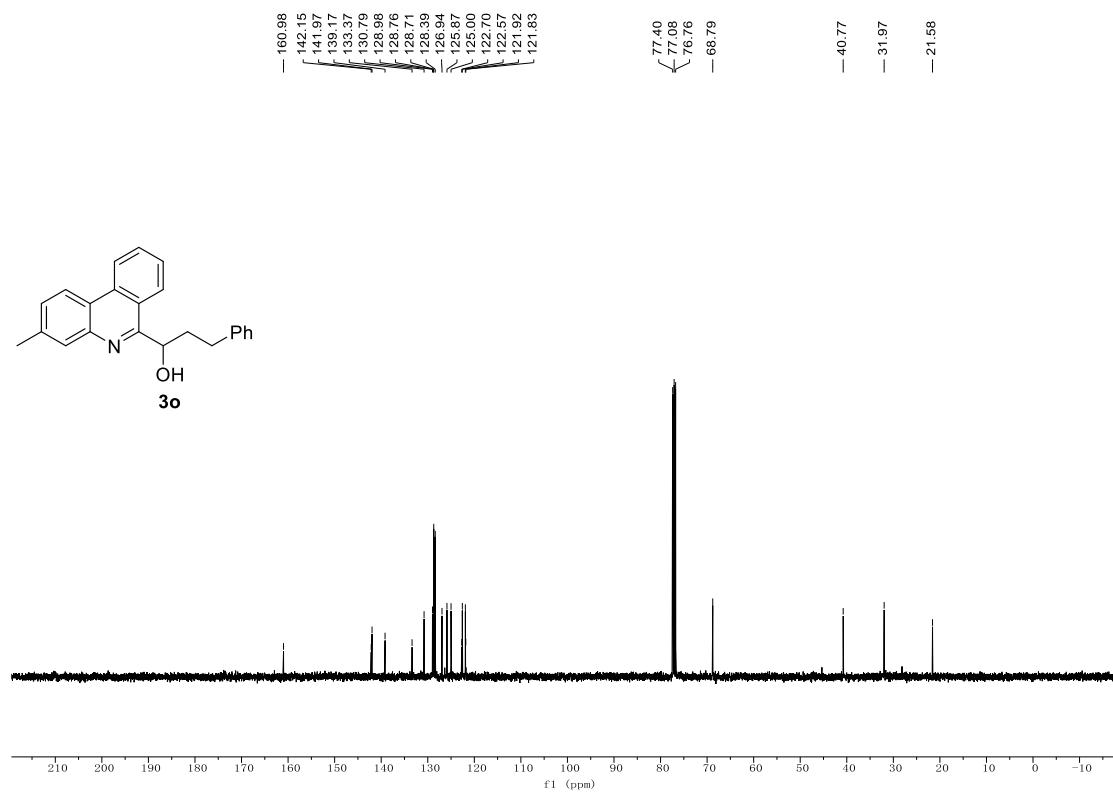

<sup>1</sup>H NMR (400 MHz, CDCl<sub>3</sub>), <sup>13</sup>C NMR (100 MHz, CDCl<sub>3</sub>) spectra of product 3p

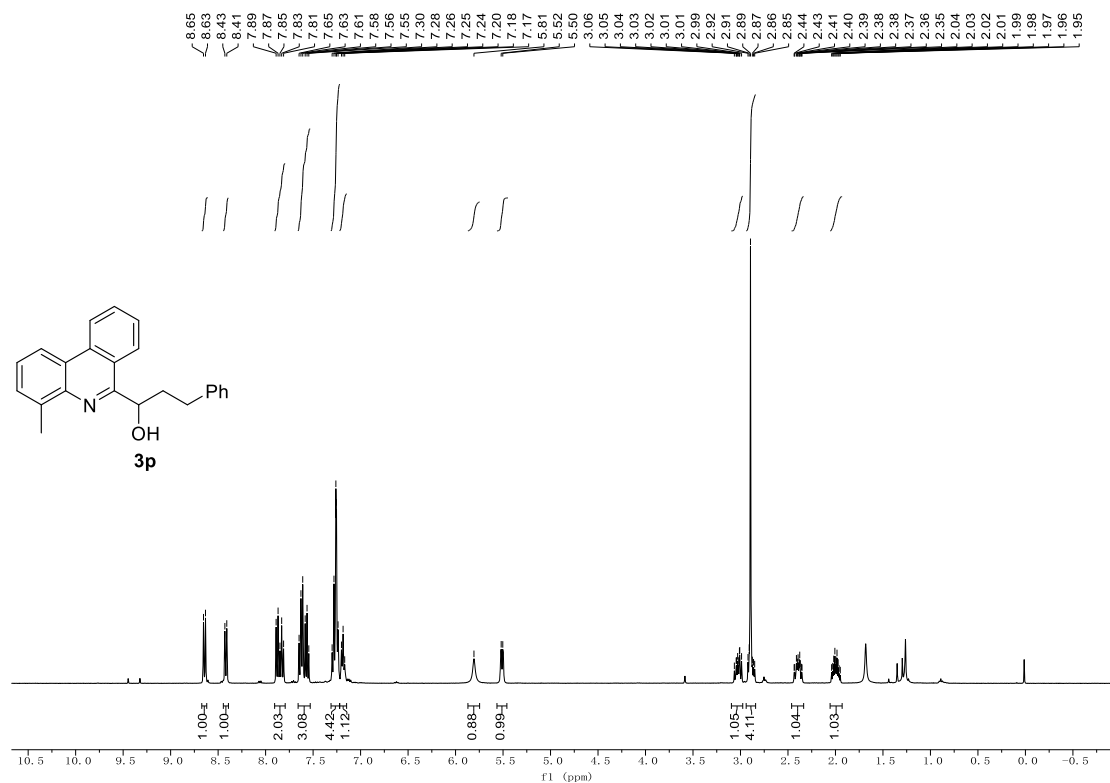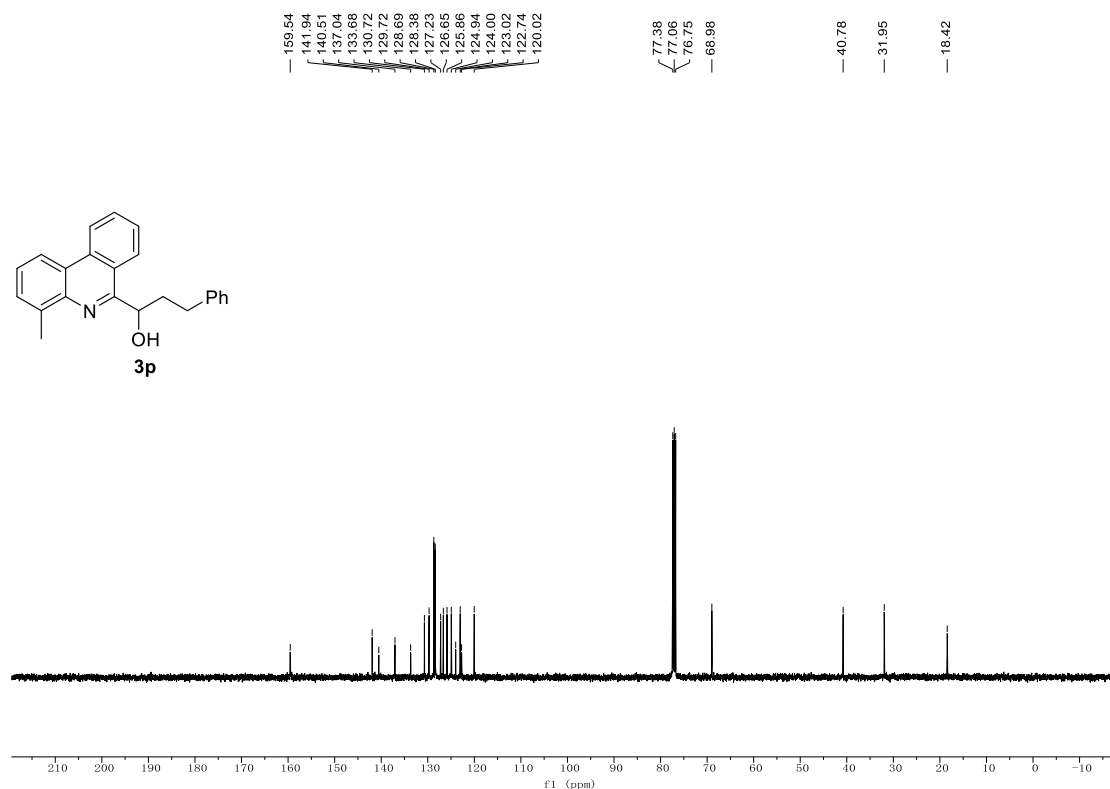



**$^1\text{H}$  NMR (400 MHz,  $\text{CDCl}_3$ ),  $^{13}\text{C}$  NMR (100 MHz,  $\text{CDCl}_3$ ) spectra of product 3q**

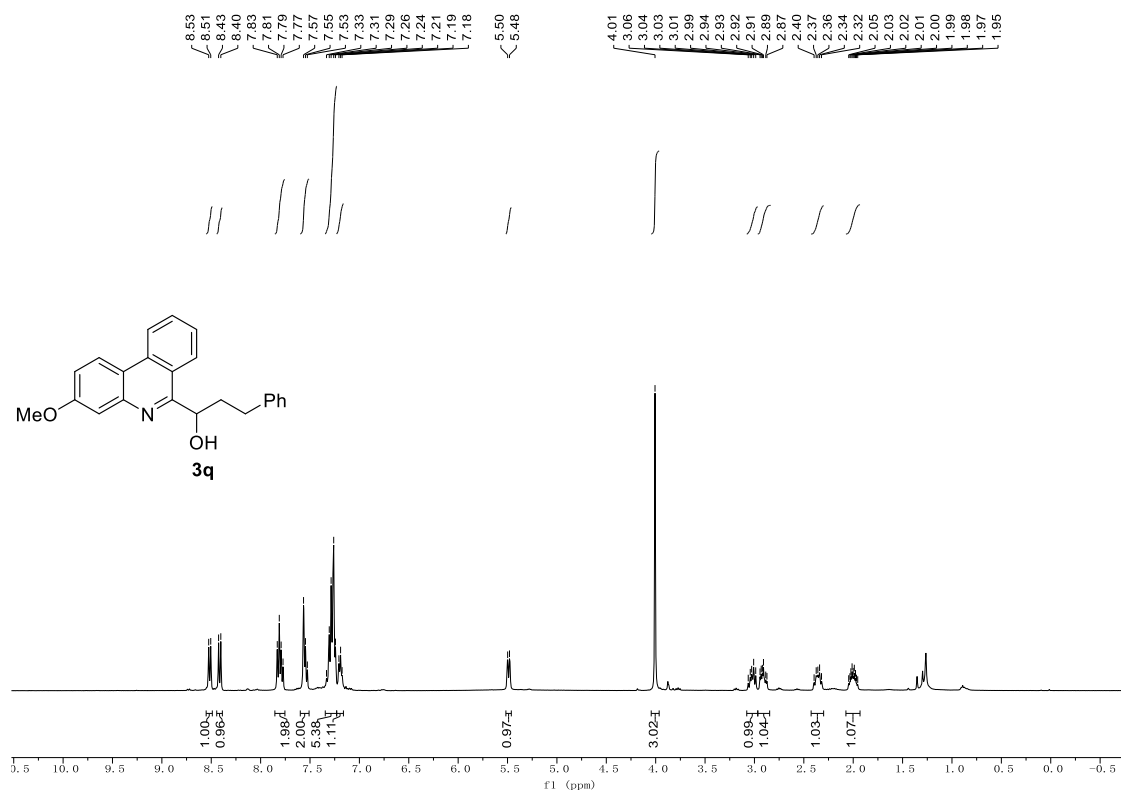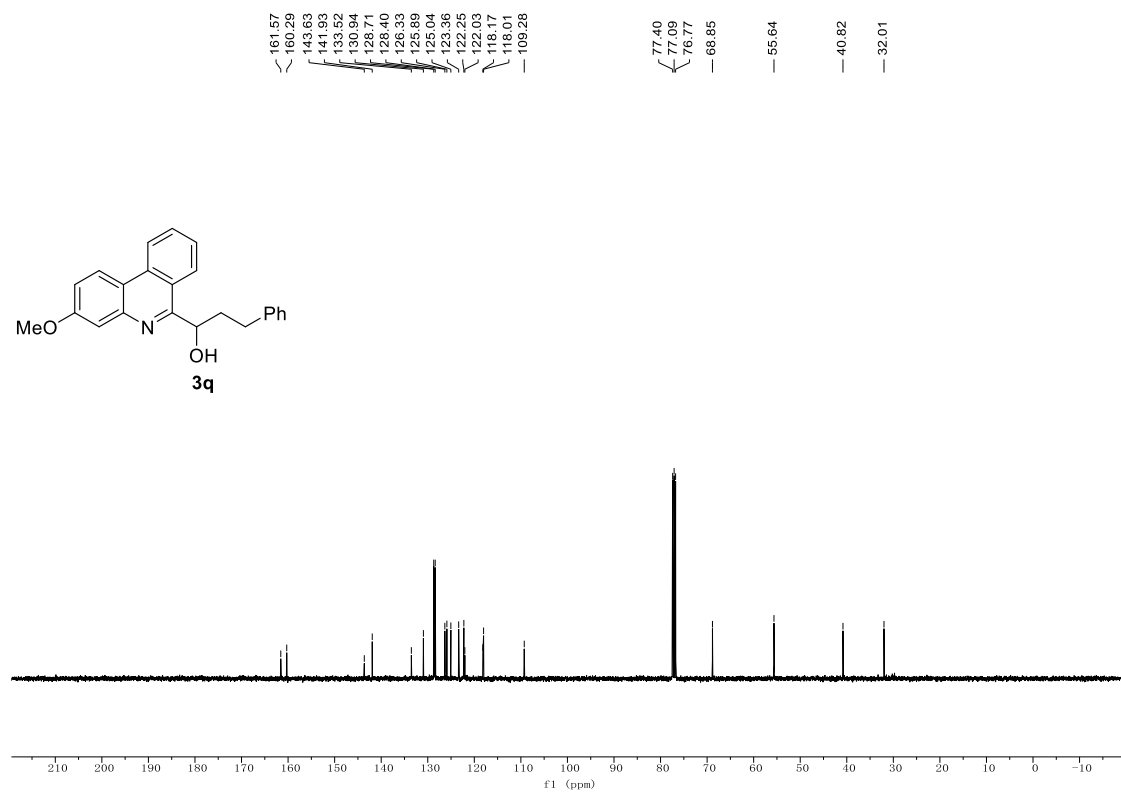

**<sup>1</sup>H NMR (400 MHz, CDCl<sub>3</sub>), <sup>13</sup>C NMR (100 MHz, CDCl<sub>3</sub>) spectra of product 3r**

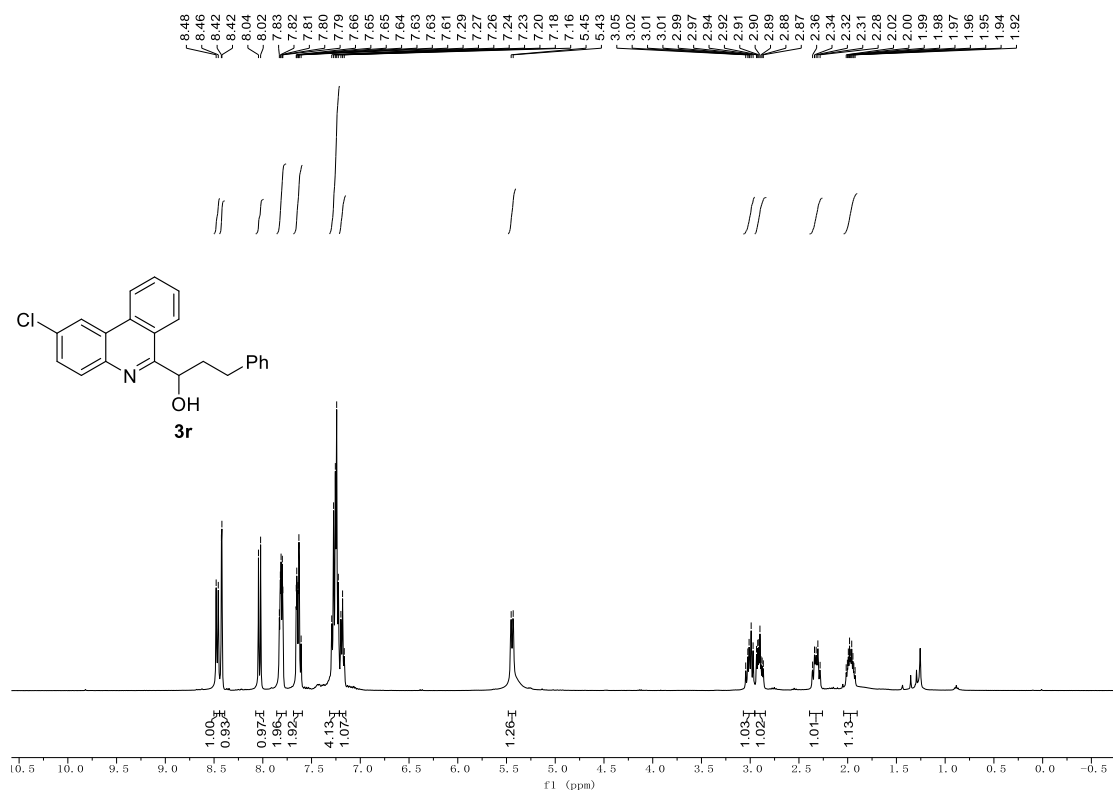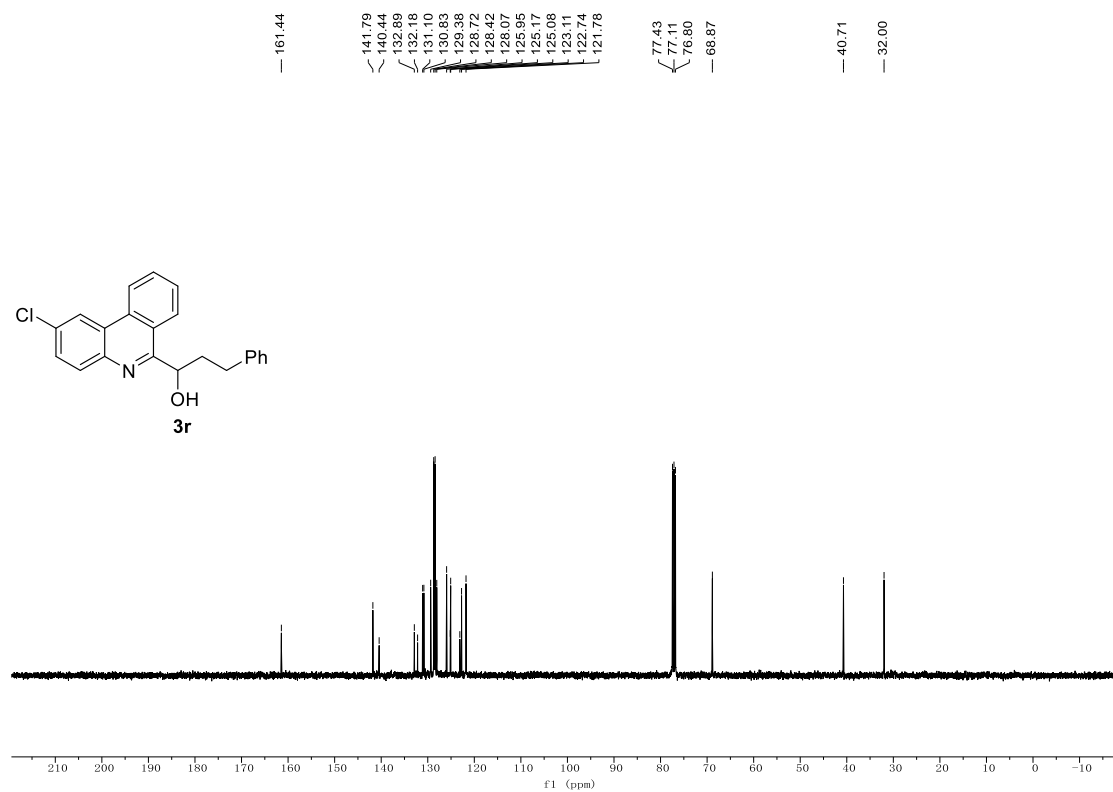

**<sup>1</sup>H NMR (400 MHz, CDCl<sub>3</sub>), <sup>13</sup>C NMR (100 MHz, CDCl<sub>3</sub>) spectra of product 3s**

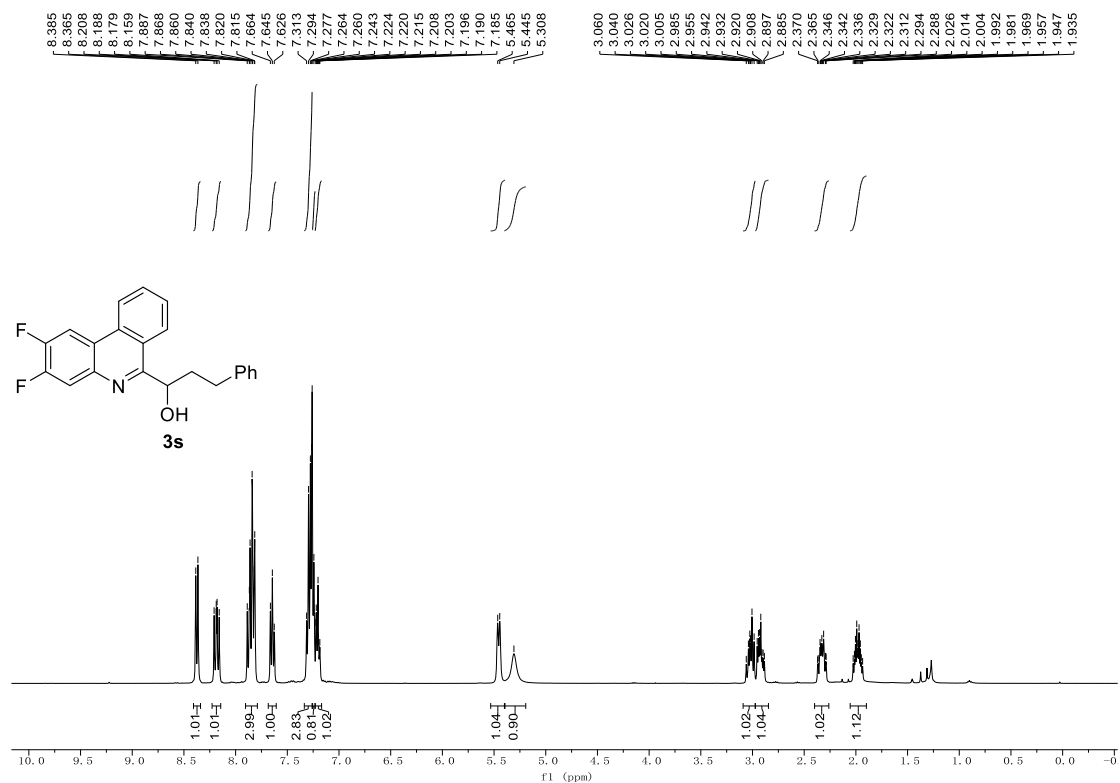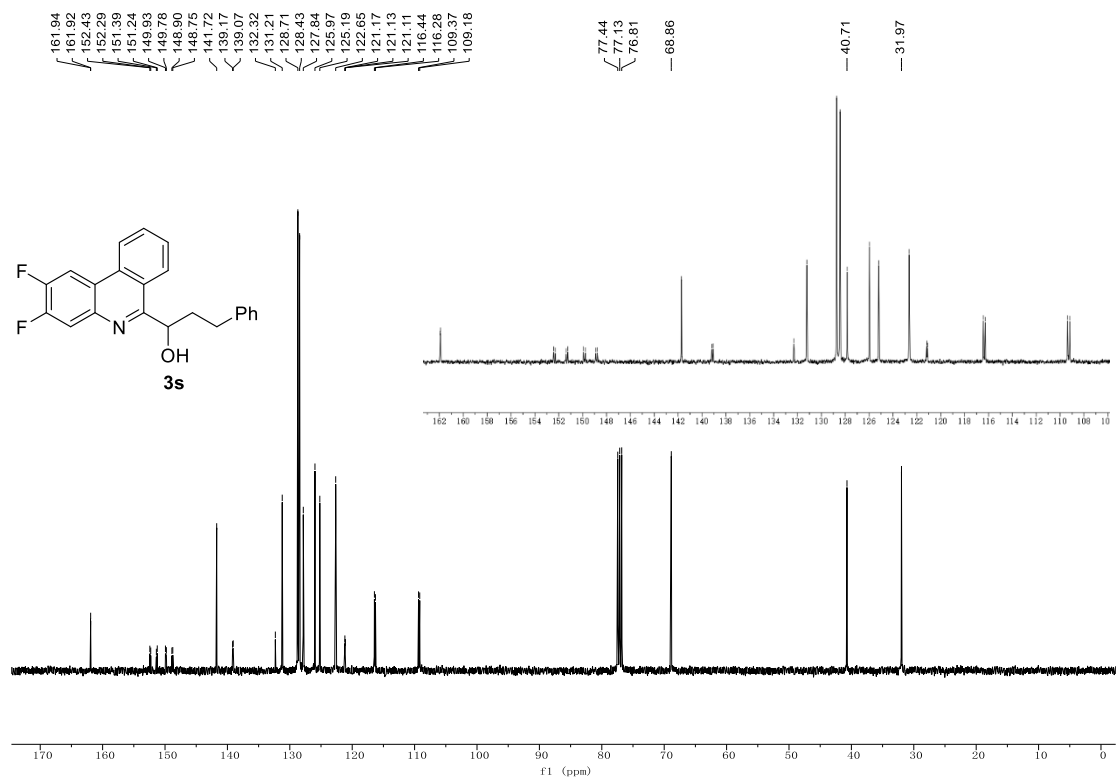

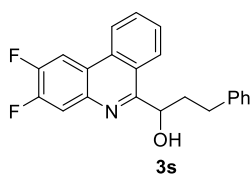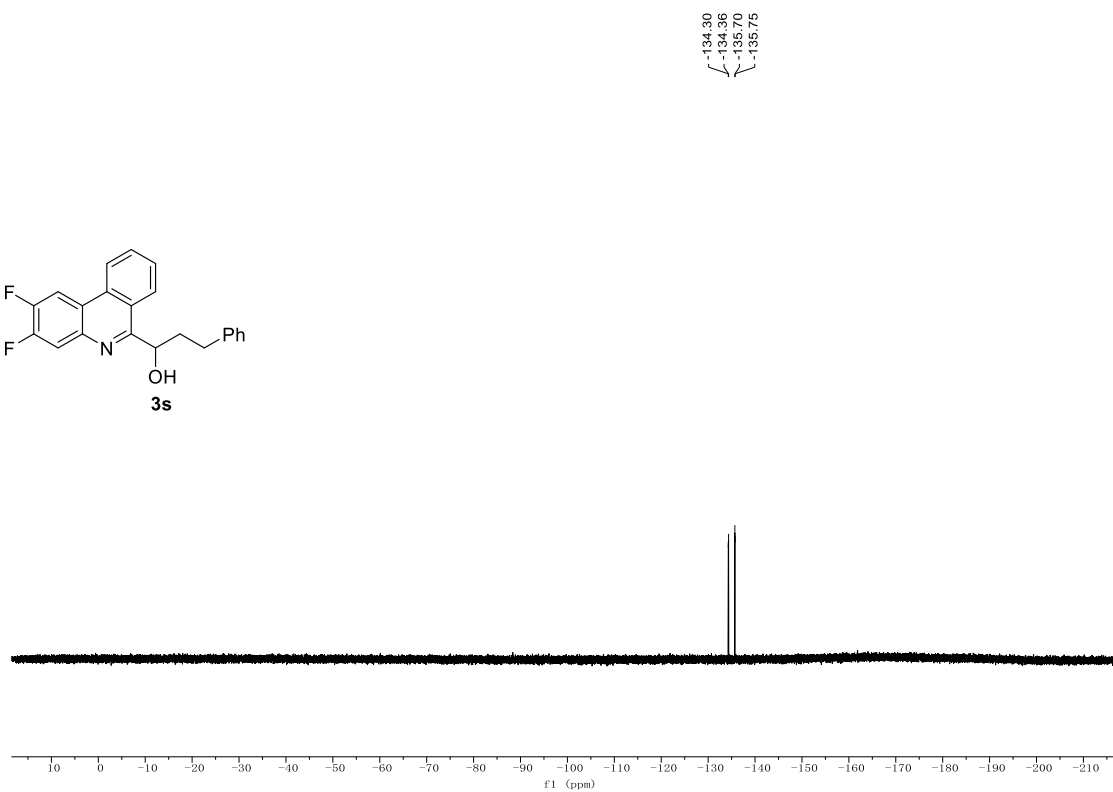

**<sup>1</sup>H NMR (400 MHz, CDCl<sub>3</sub>), <sup>13</sup>C NMR (100 MHz, CDCl<sub>3</sub>) spectra of product 4a**

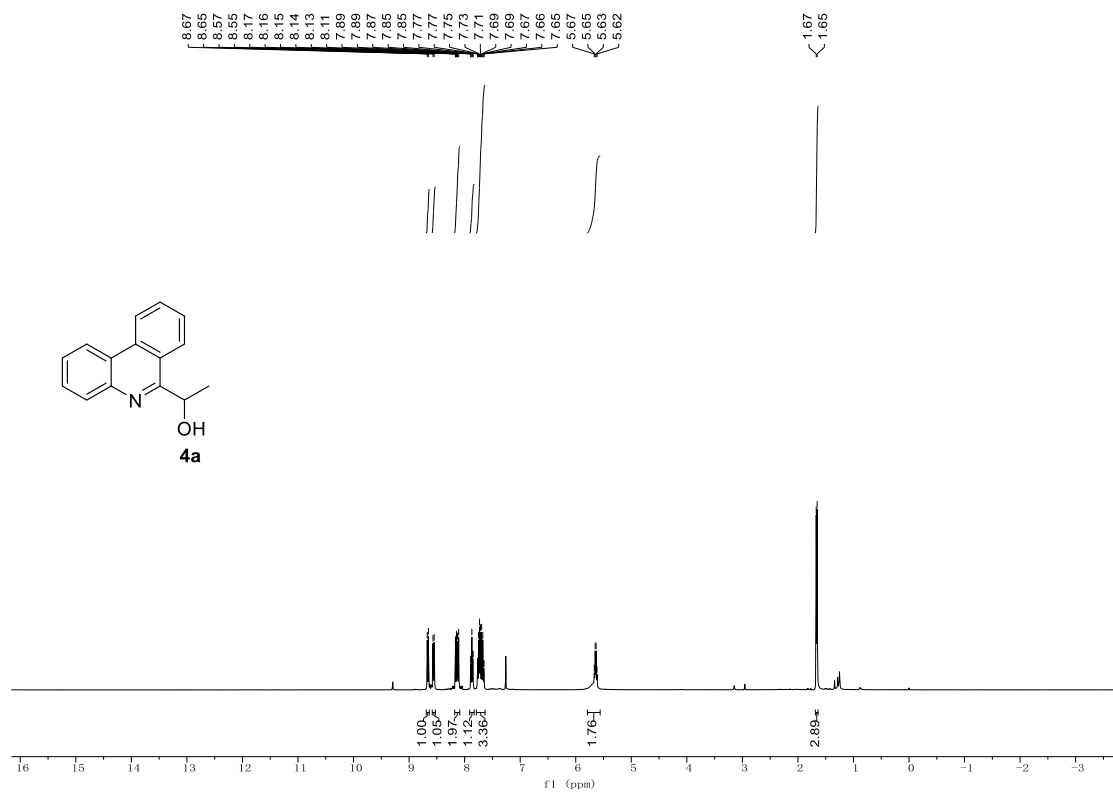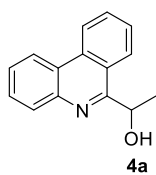

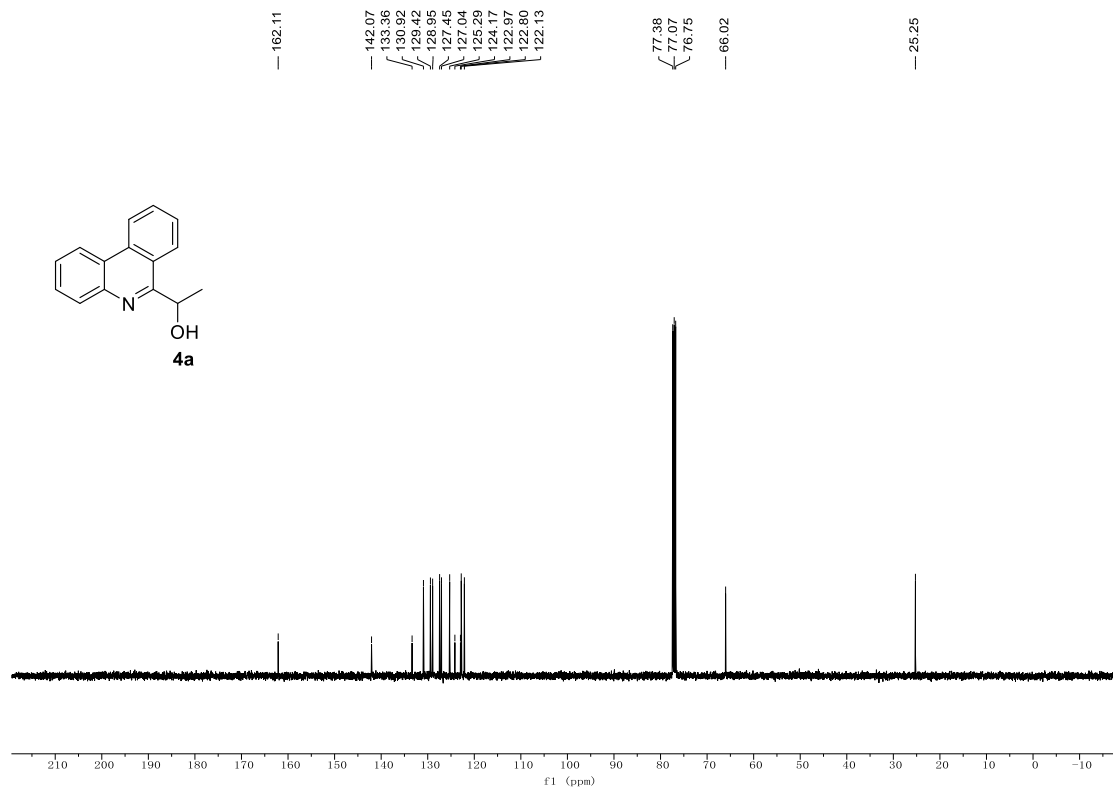

**$^1\text{H}$  NMR (400 MHz,  $\text{CDCl}_3$ ),  $^{13}\text{C}$  NMR (100 MHz,  $\text{CDCl}_3$ ) spectra of product **4b****

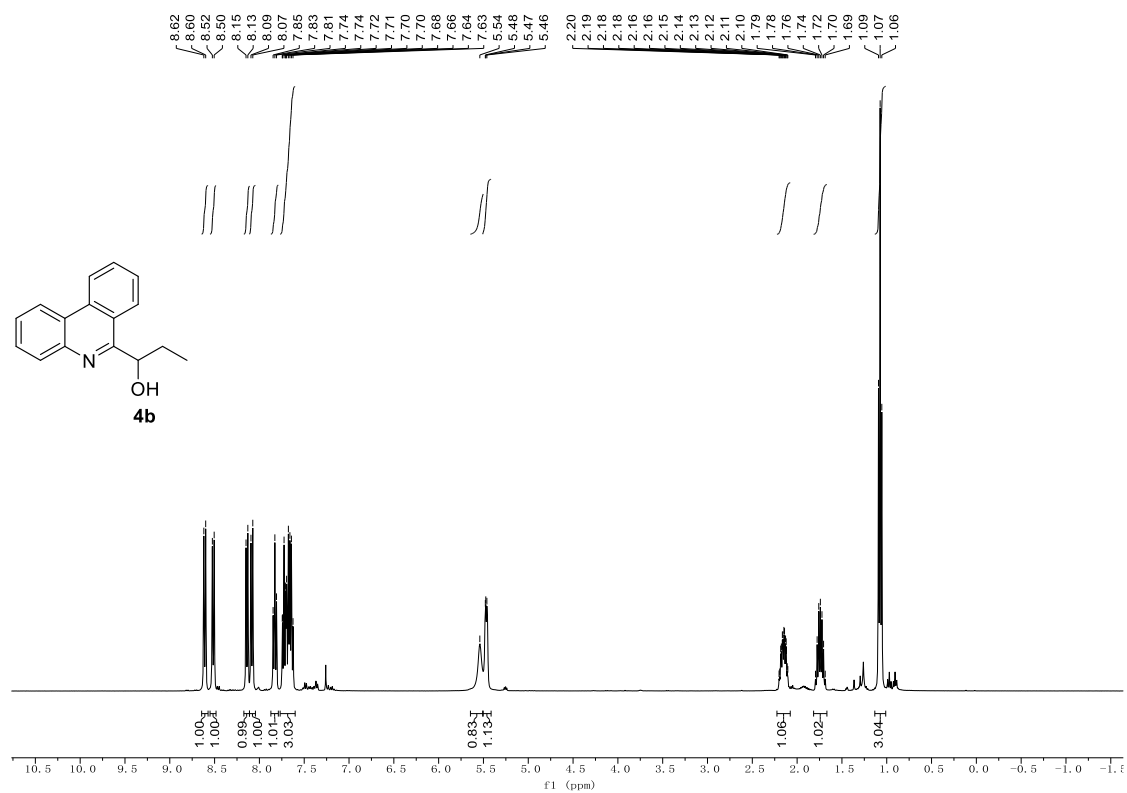

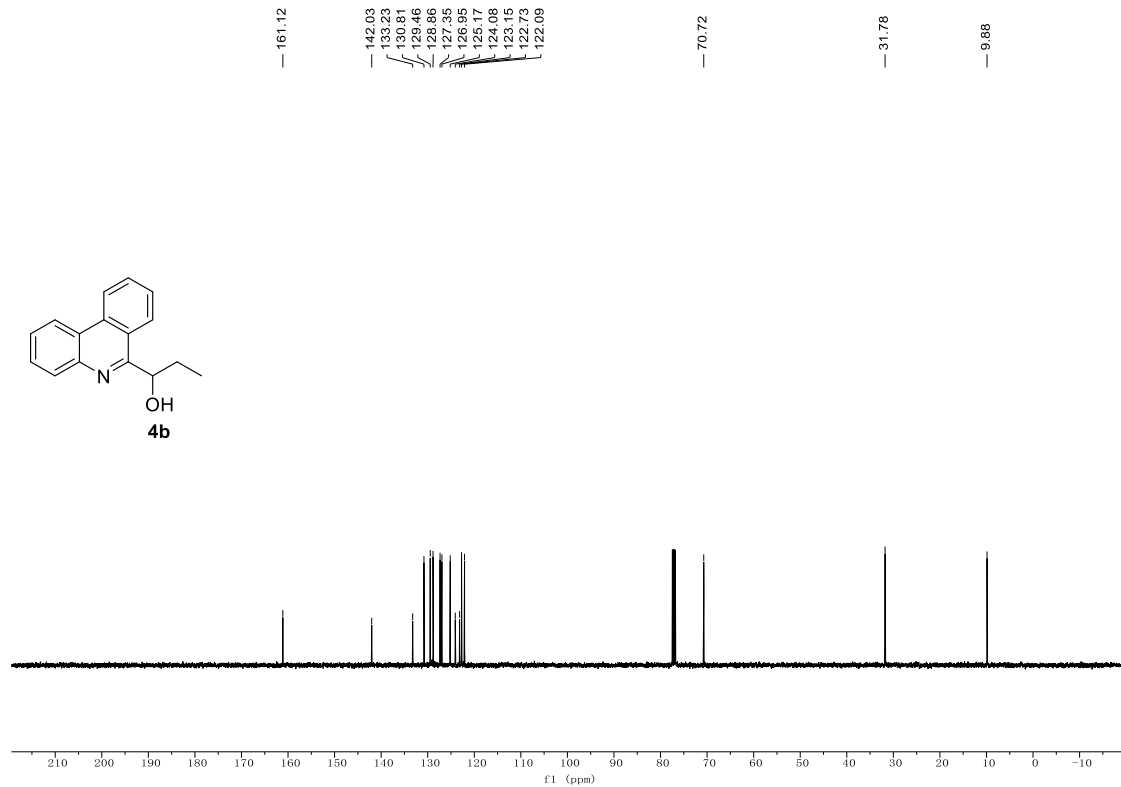

<sup>1</sup>H NMR (400 MHz, CDCl<sub>3</sub>), <sup>13</sup>C NMR (100 MHz, CDCl<sub>3</sub>) spectra of product **4c**

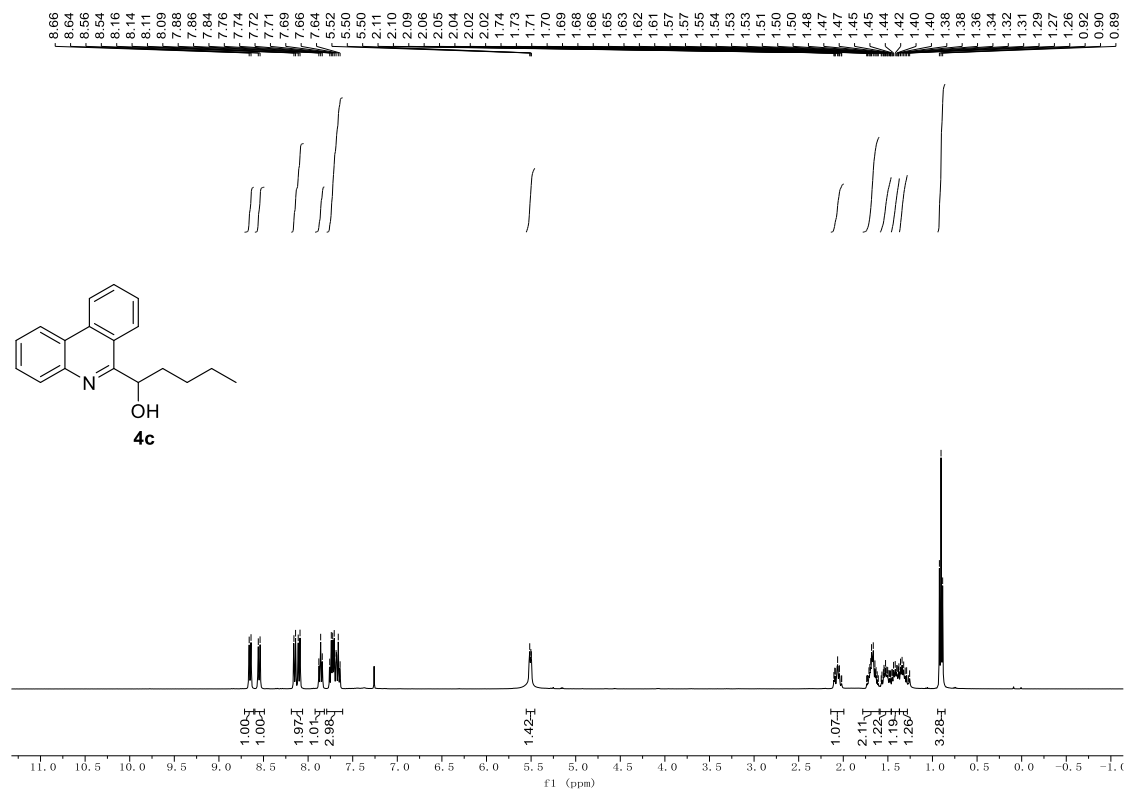

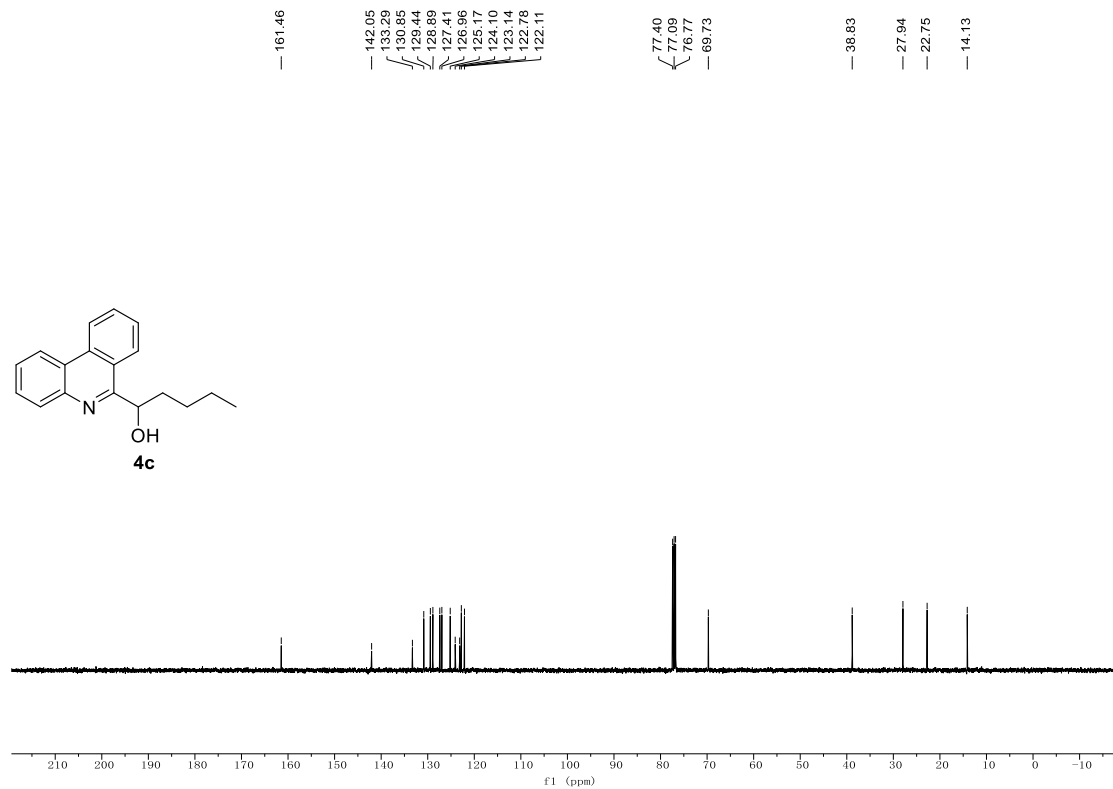

**<sup>1</sup>H NMR (400 MHz, CDCl<sub>3</sub>), <sup>13</sup>C NMR (100 MHz, CDCl<sub>3</sub>) spectra of product 4d**

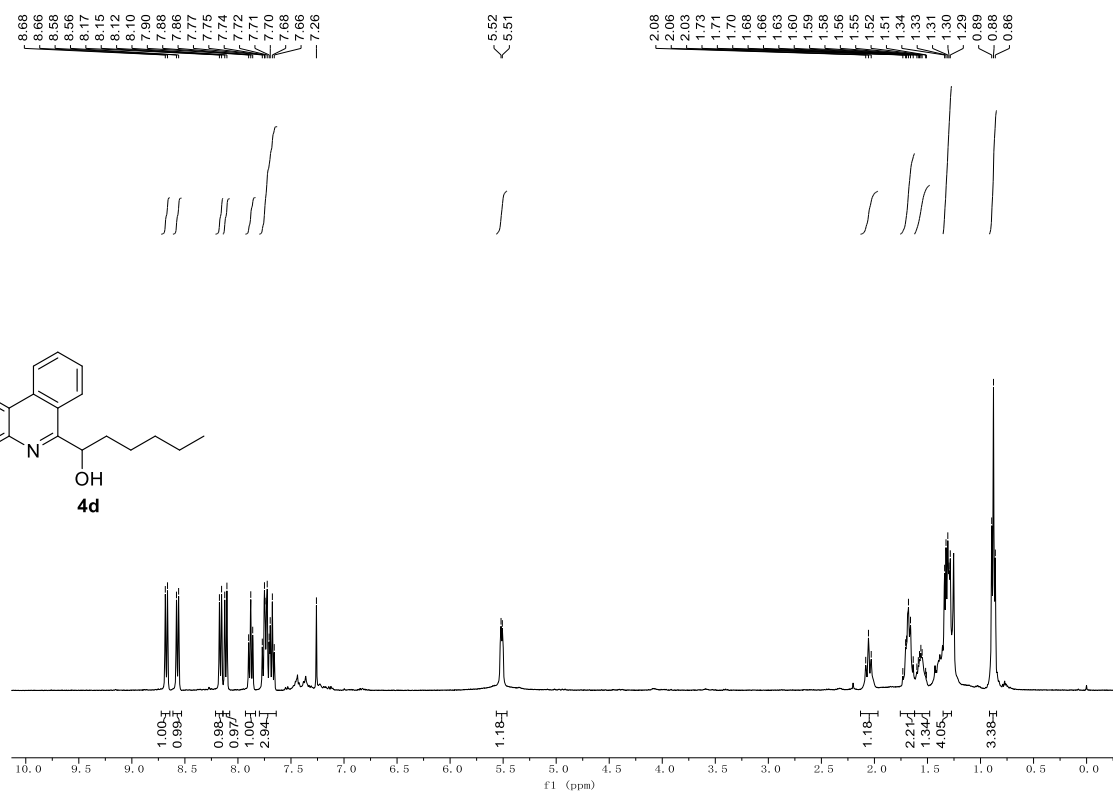

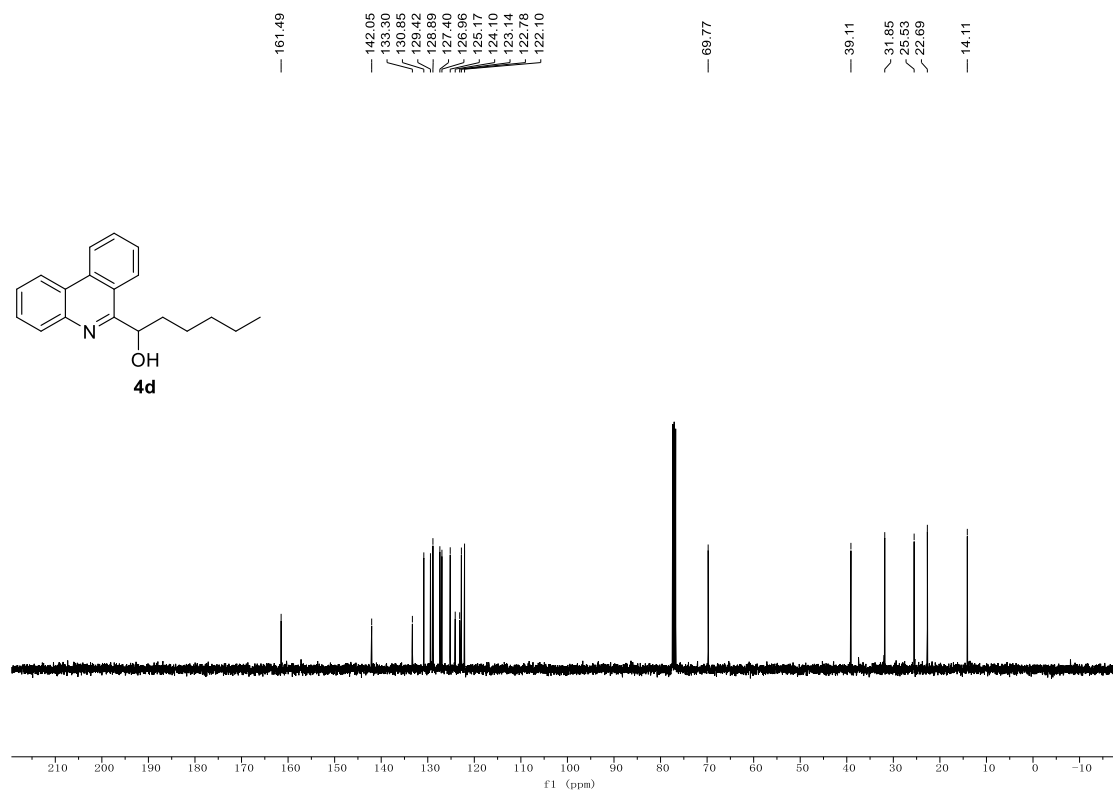

$^1\text{H}$  NMR (400 MHz,  $\text{CDCl}_3$ ),  $^{13}\text{C}$  NMR (100 MHz,  $\text{CDCl}_3$ ) spectra of product **4e**

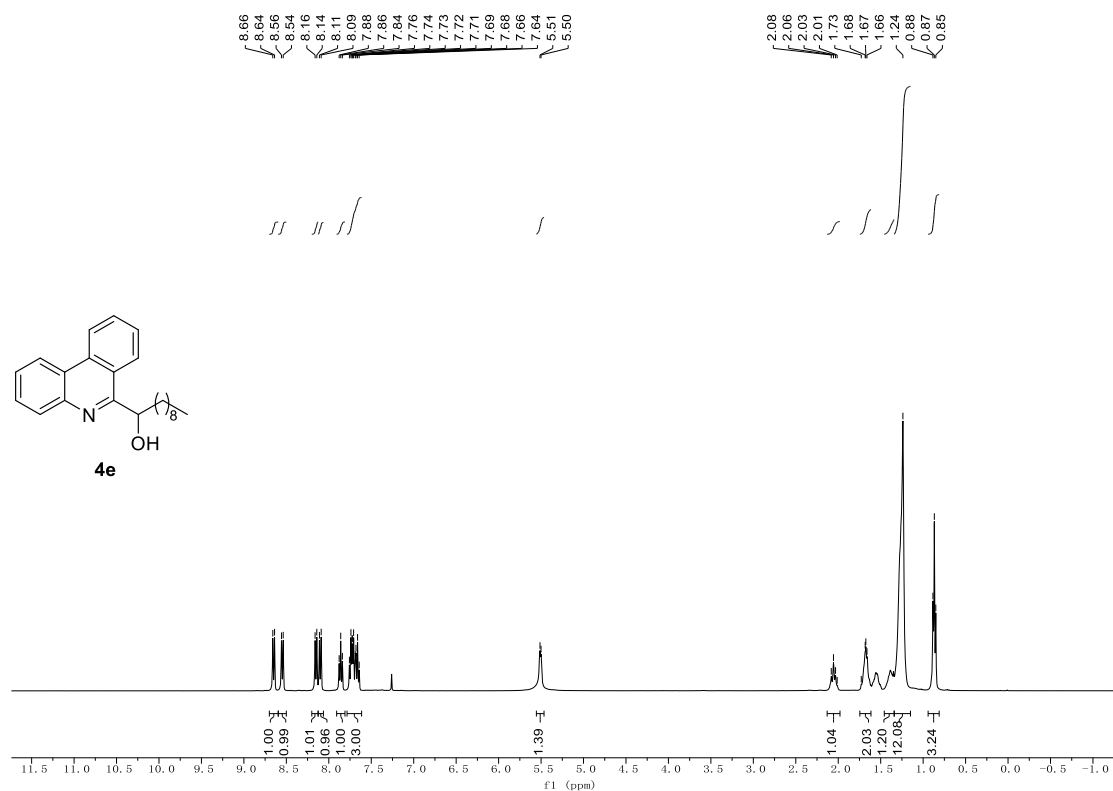



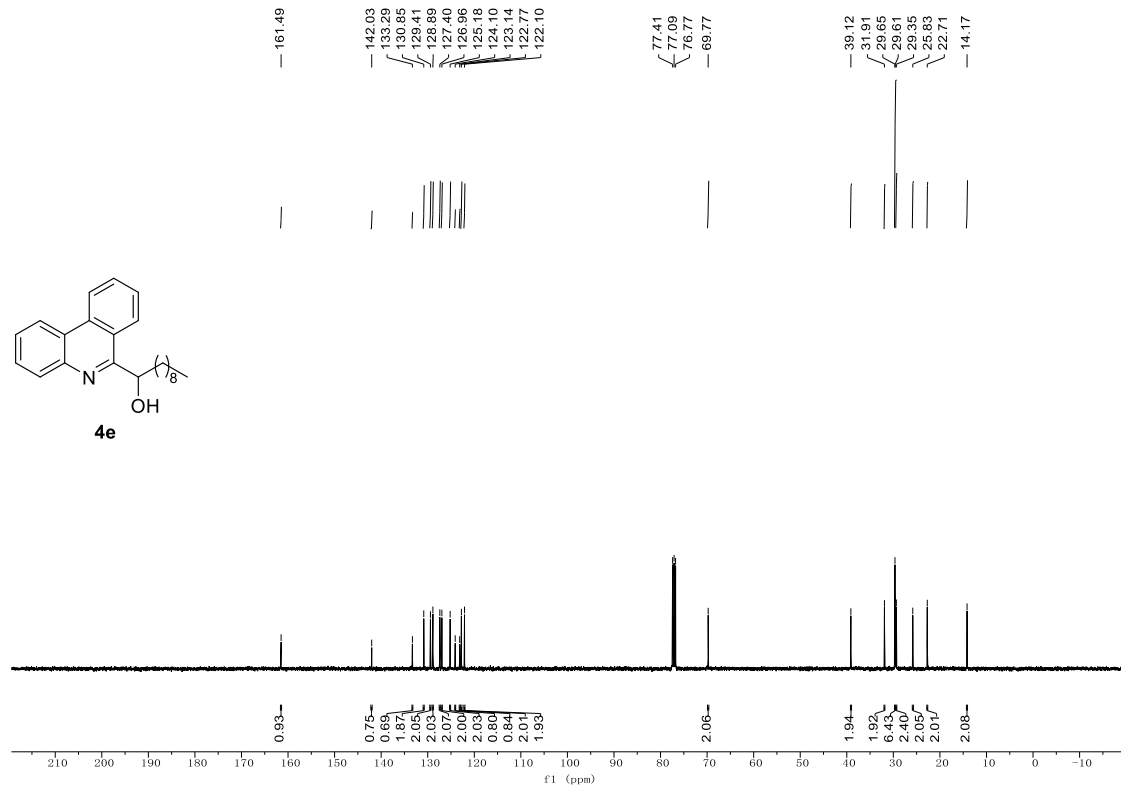

**<sup>1</sup>H NMR (400 MHz, CDCl<sub>3</sub>), <sup>13</sup>C NMR (100 MHz, CDCl<sub>3</sub>) spectra of product 4f**

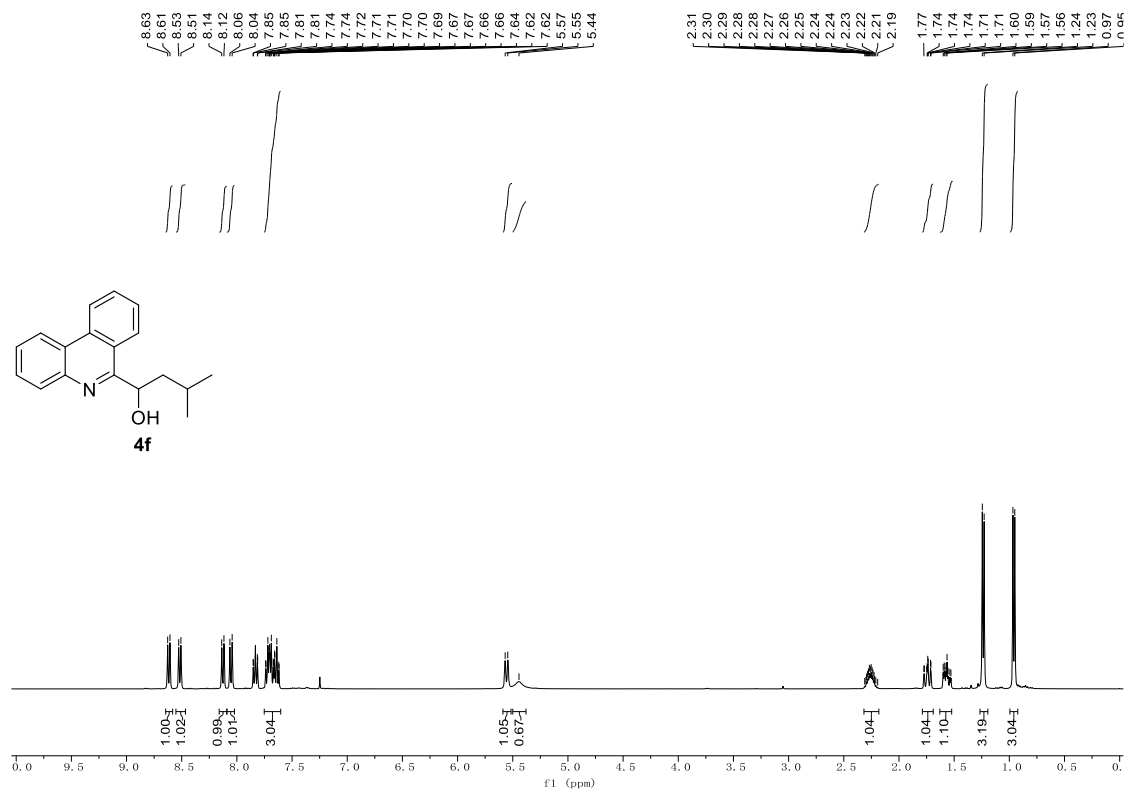

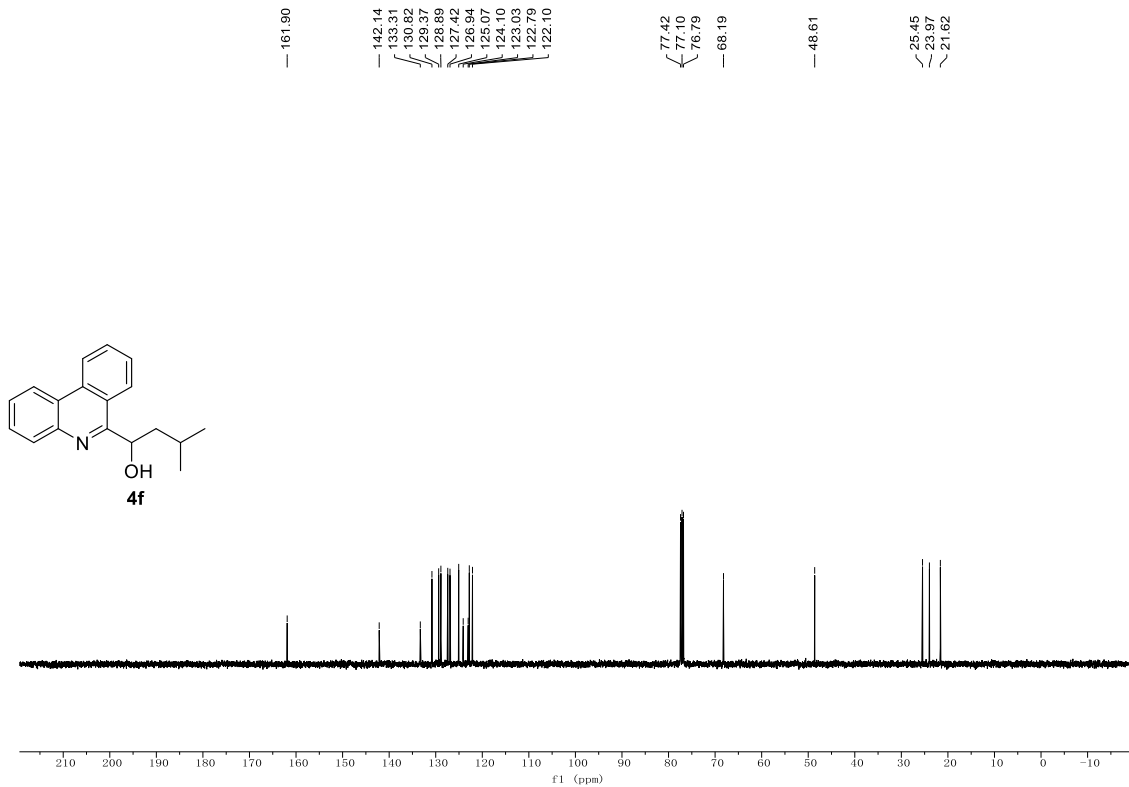

<sup>1</sup>H NMR (400 MHz, CDCl<sub>3</sub>), <sup>13</sup>C NMR (100 MHz, CDCl<sub>3</sub>) spectra of product 4g

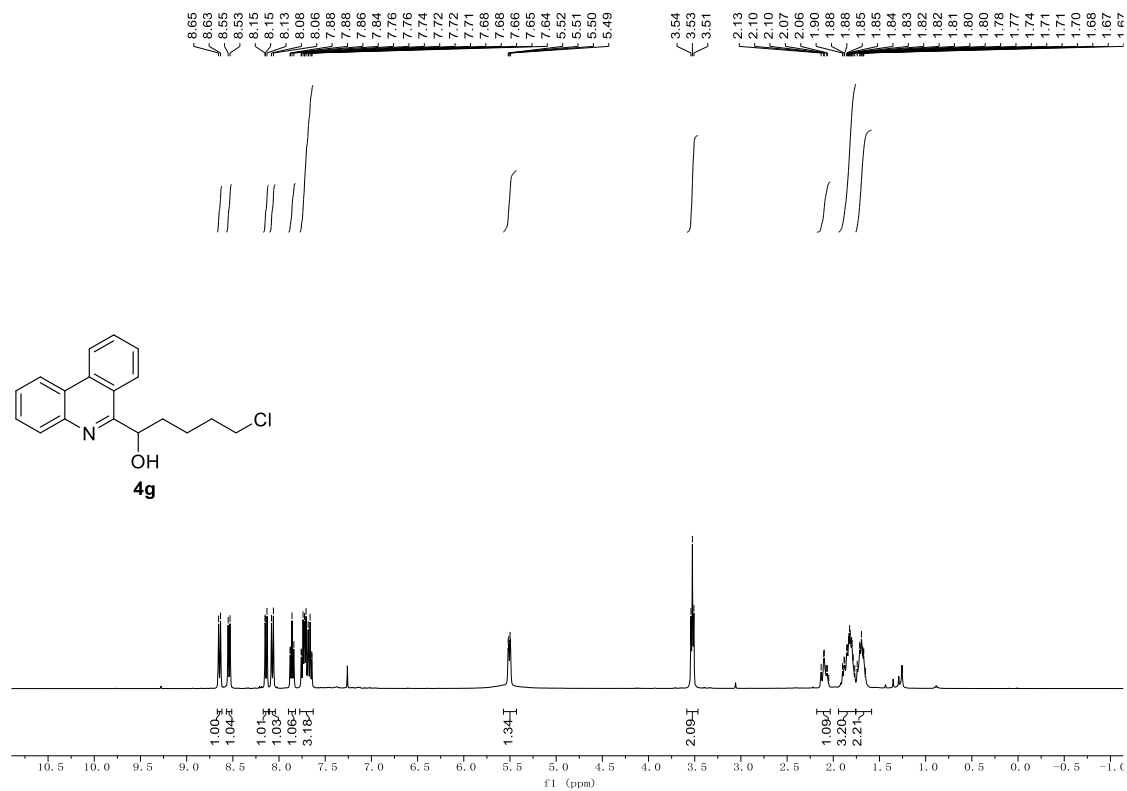

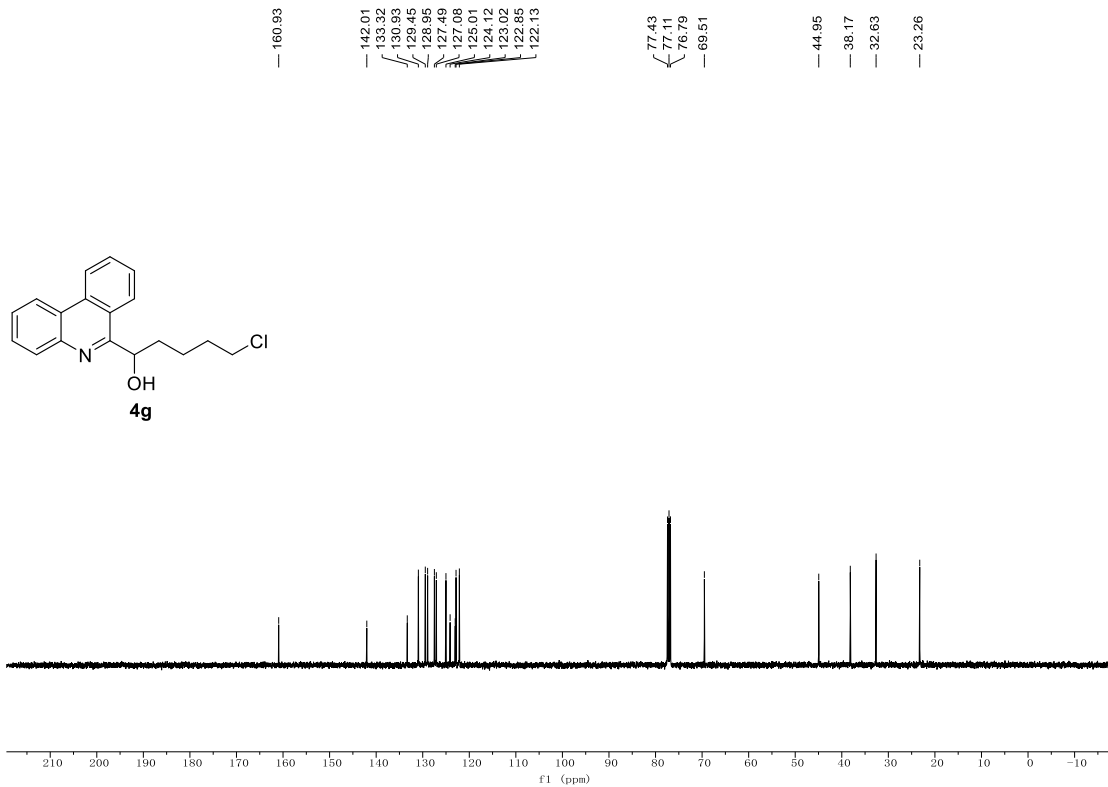

**<sup>1</sup>H NMR (400 MHz, CDCl<sub>3</sub>), <sup>13</sup>C NMR (100 MHz, CDCl<sub>3</sub>) spectra of product 4h**

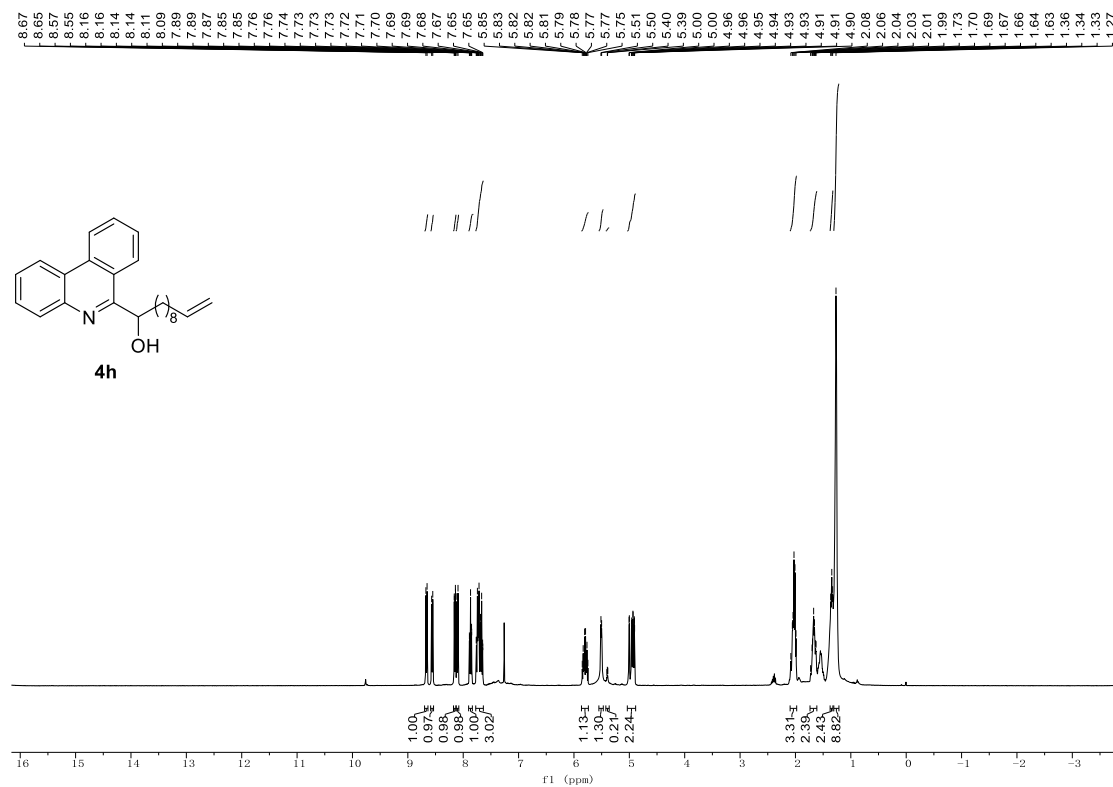

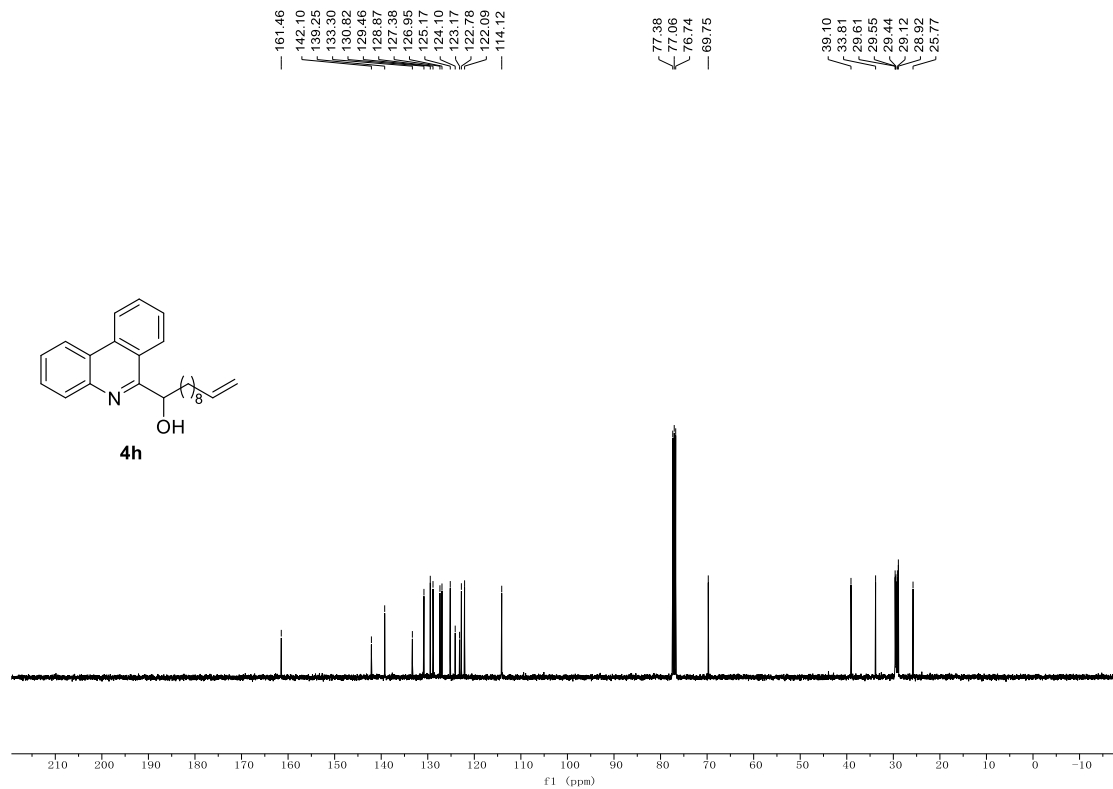

**<sup>1</sup>H NMR (400 MHz, CDCl<sub>3</sub>), <sup>13</sup>C NMR (100 MHz, CDCl<sub>3</sub>) spectra of product 4i**

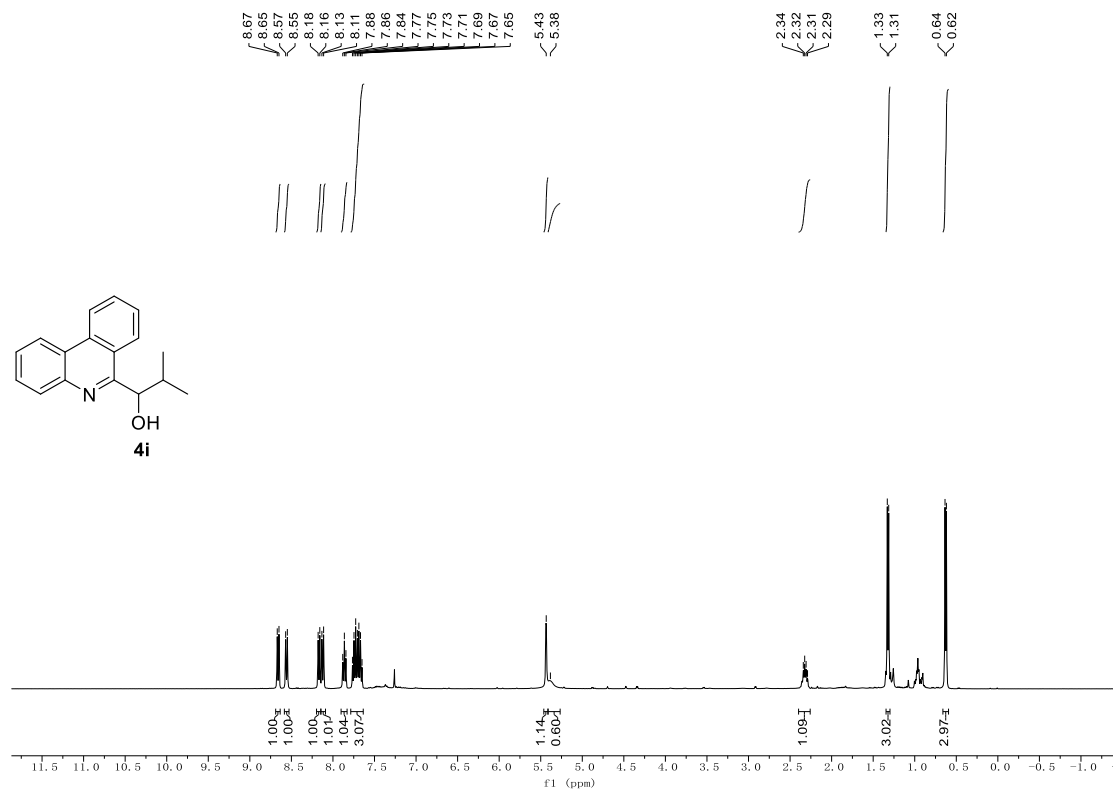

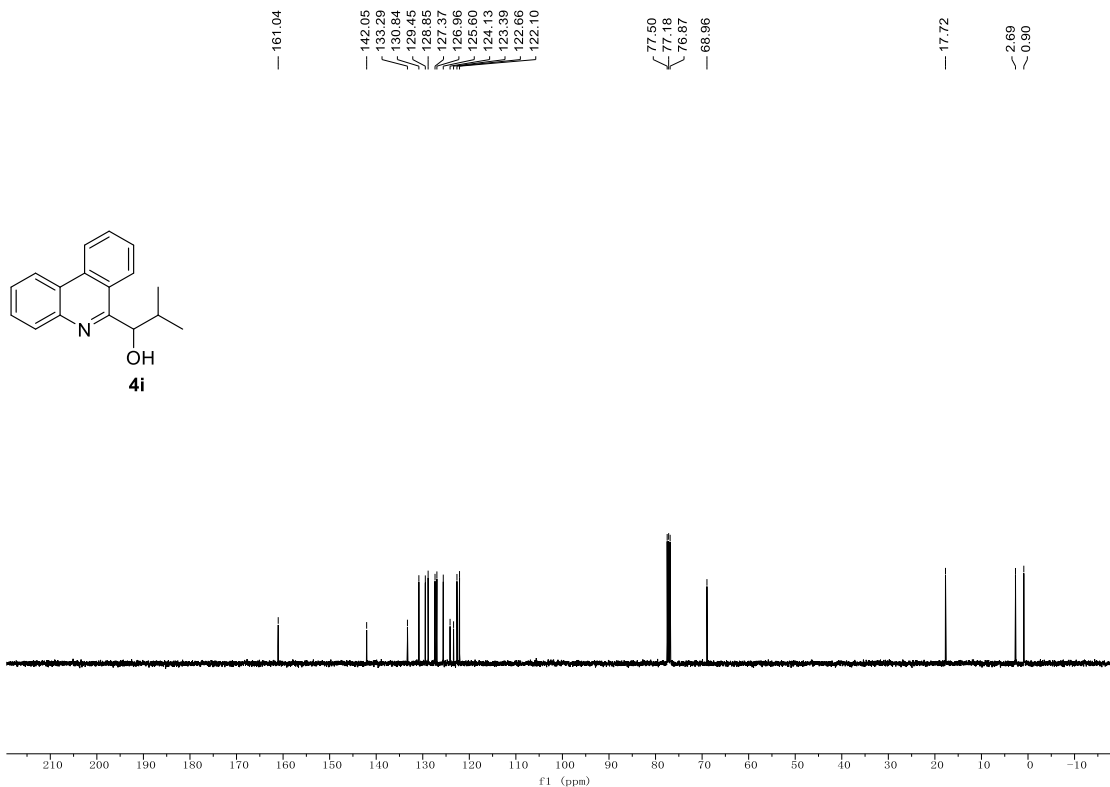

**$^1\text{H}$  NMR (400 MHz,  $\text{CDCl}_3$ ),  $^{13}\text{C}$  NMR (100 MHz,  $\text{CDCl}_3$ ) spectra of product **4j****

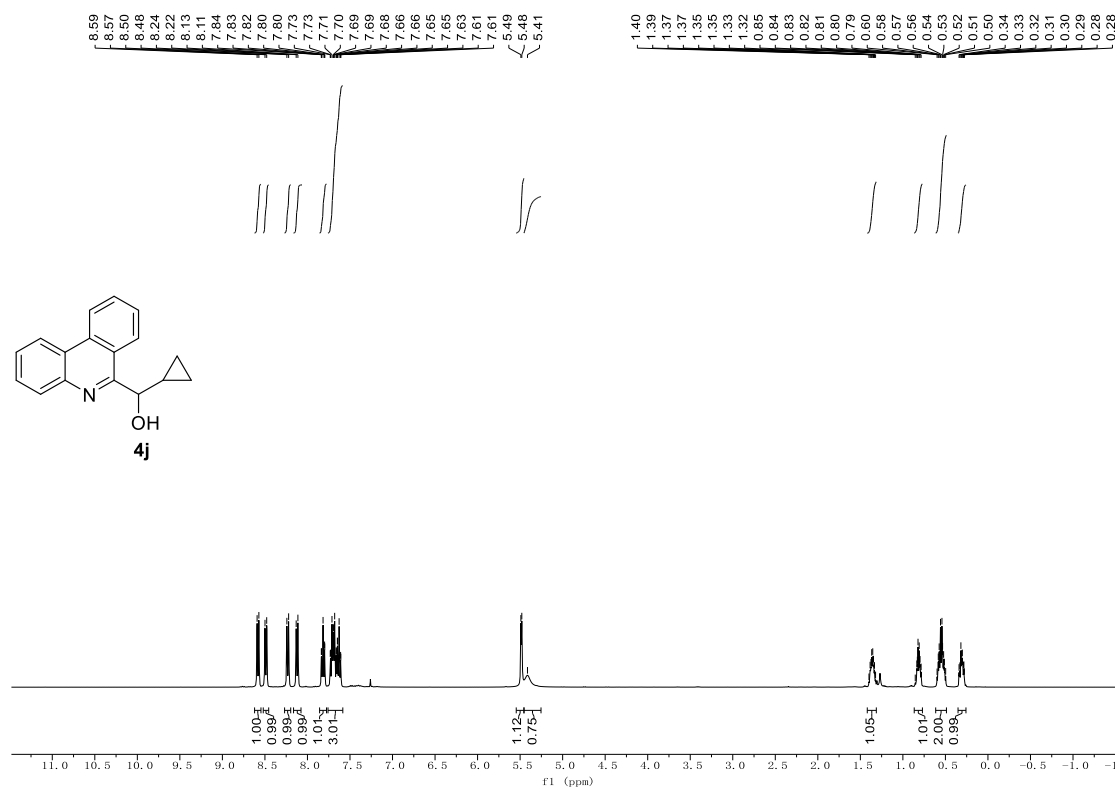

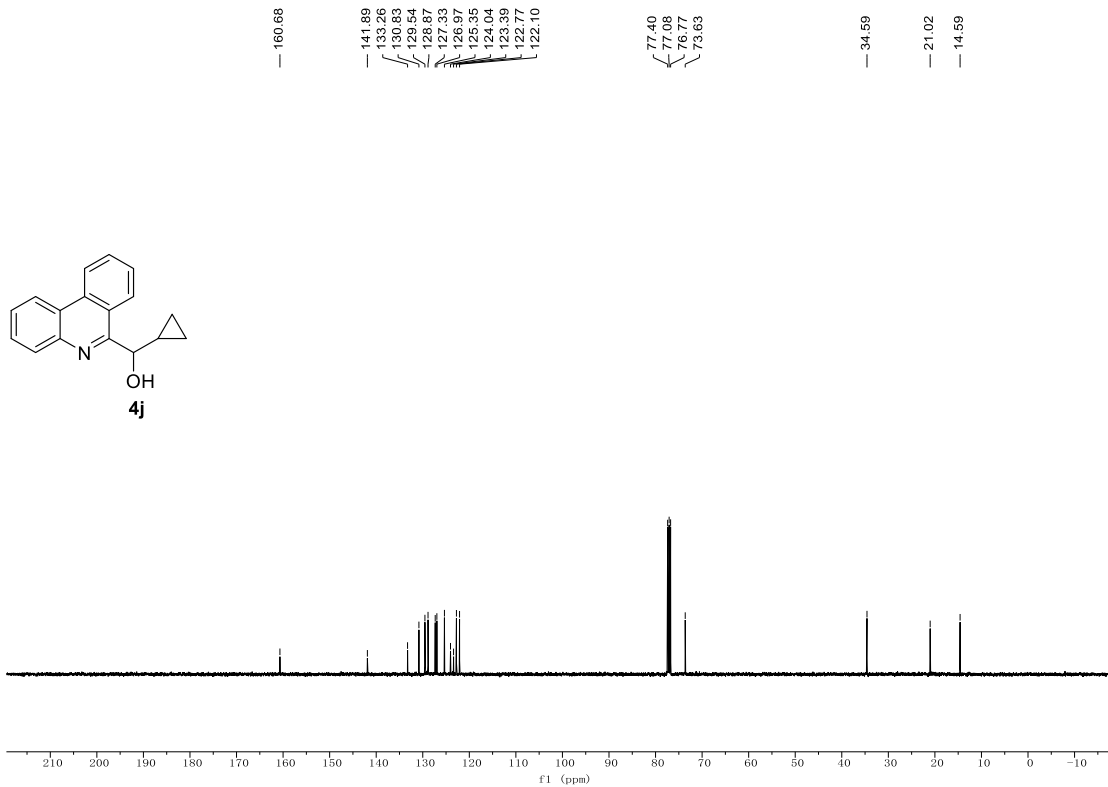

**<sup>1</sup>H NMR (400 MHz, CDCl<sub>3</sub>), <sup>13</sup>C NMR (100 MHz, CDCl<sub>3</sub>) spectra of product 4k**

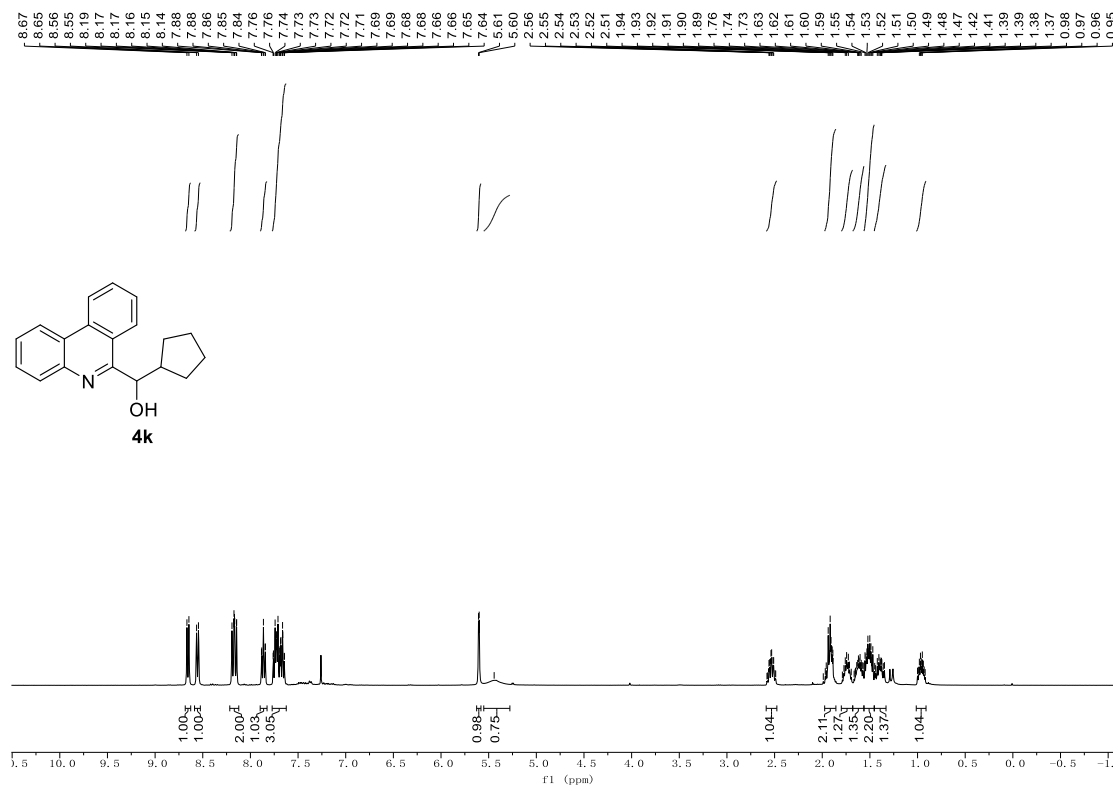

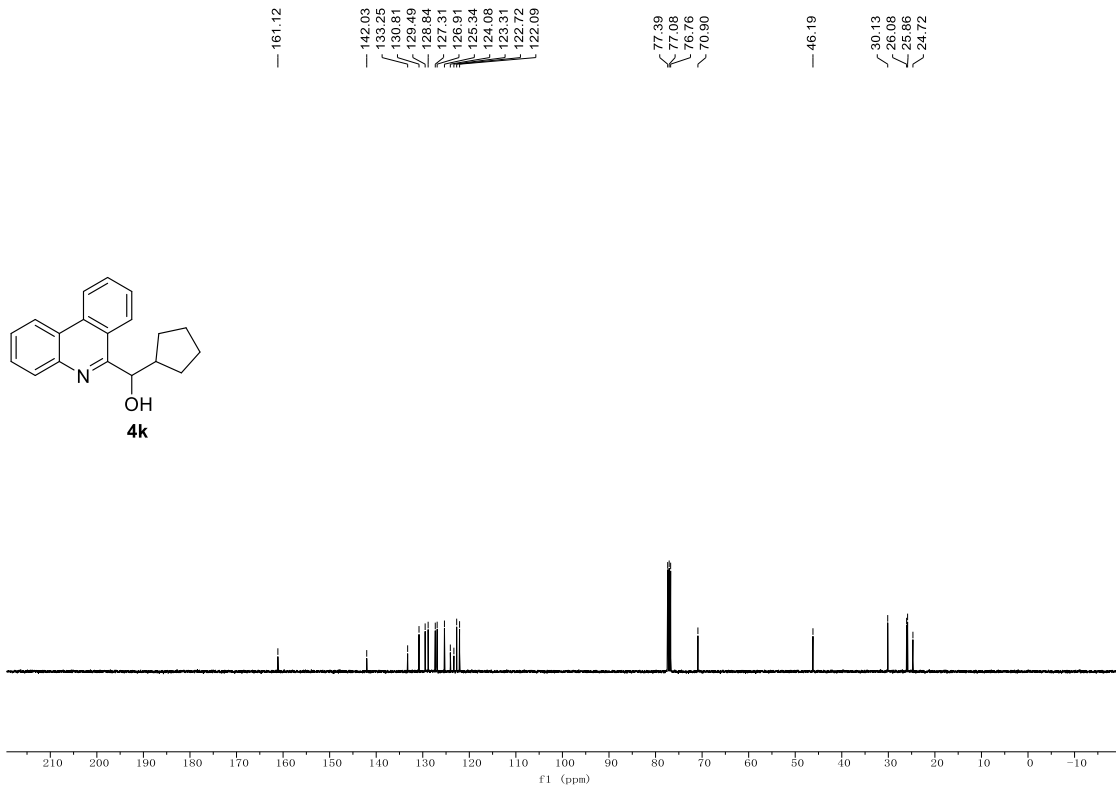

**<sup>1</sup>H NMR (400 MHz, CDCl<sub>3</sub>), <sup>13</sup>C NMR (100 MHz, CDCl<sub>3</sub>) spectra of product 4l**

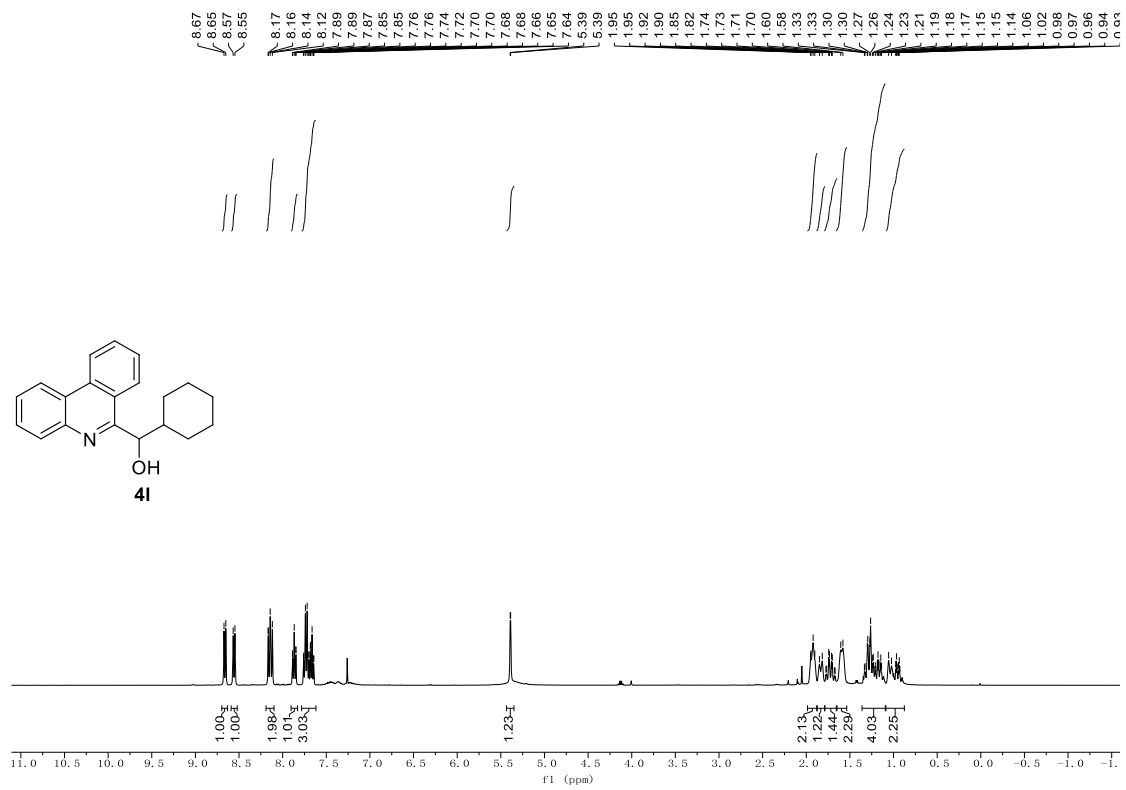

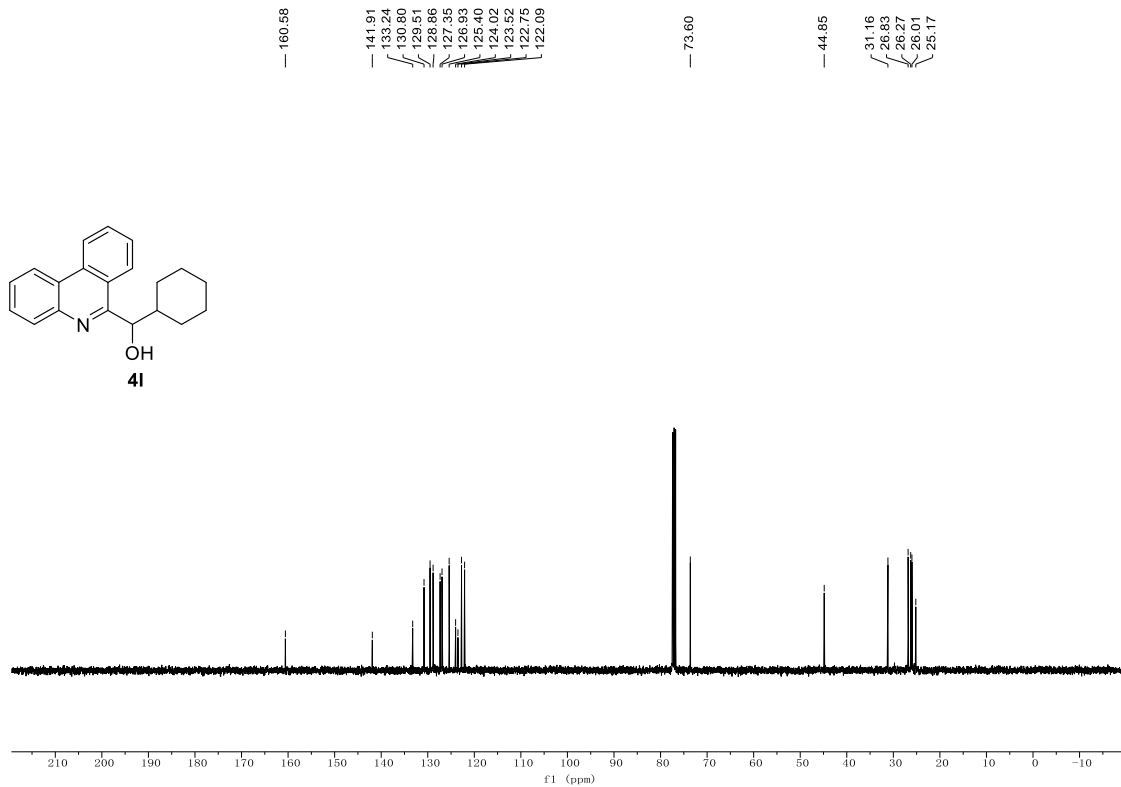

**$^1\text{H}$  NMR (400 MHz,  $\text{CDCl}_3$ ),  $^{13}\text{C}$  NMR (100 MHz,  $\text{CDCl}_3$ ) spectra of product **4m****

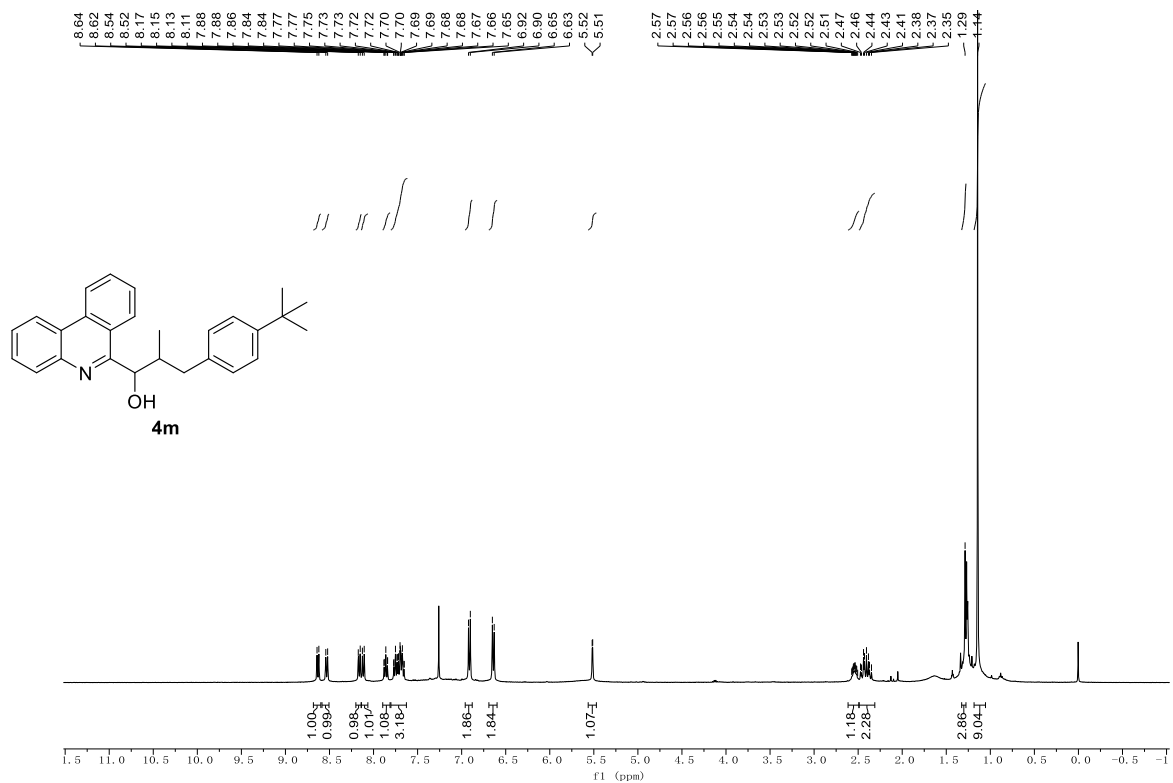



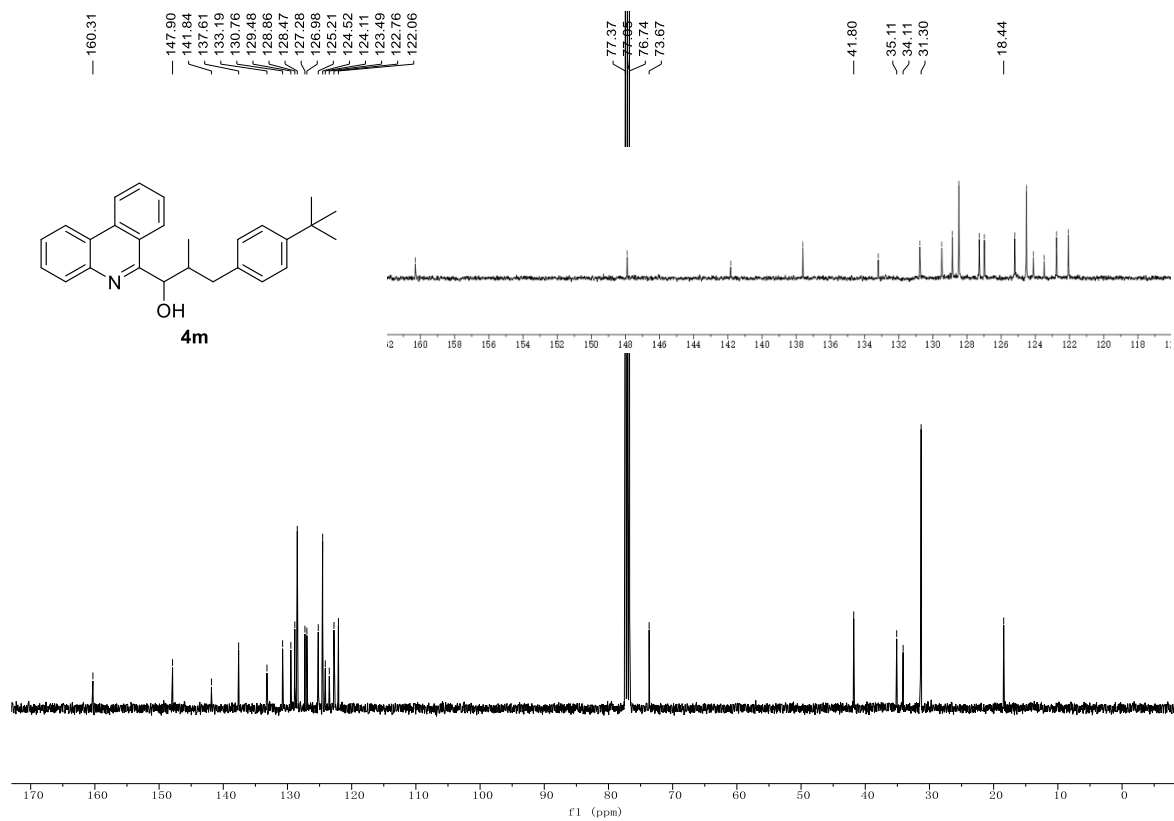

**<sup>1</sup>H NMR (400 MHz, CDCl<sub>3</sub>), <sup>13</sup>C NMR (100 MHz, CDCl<sub>3</sub>) spectra of product 5**

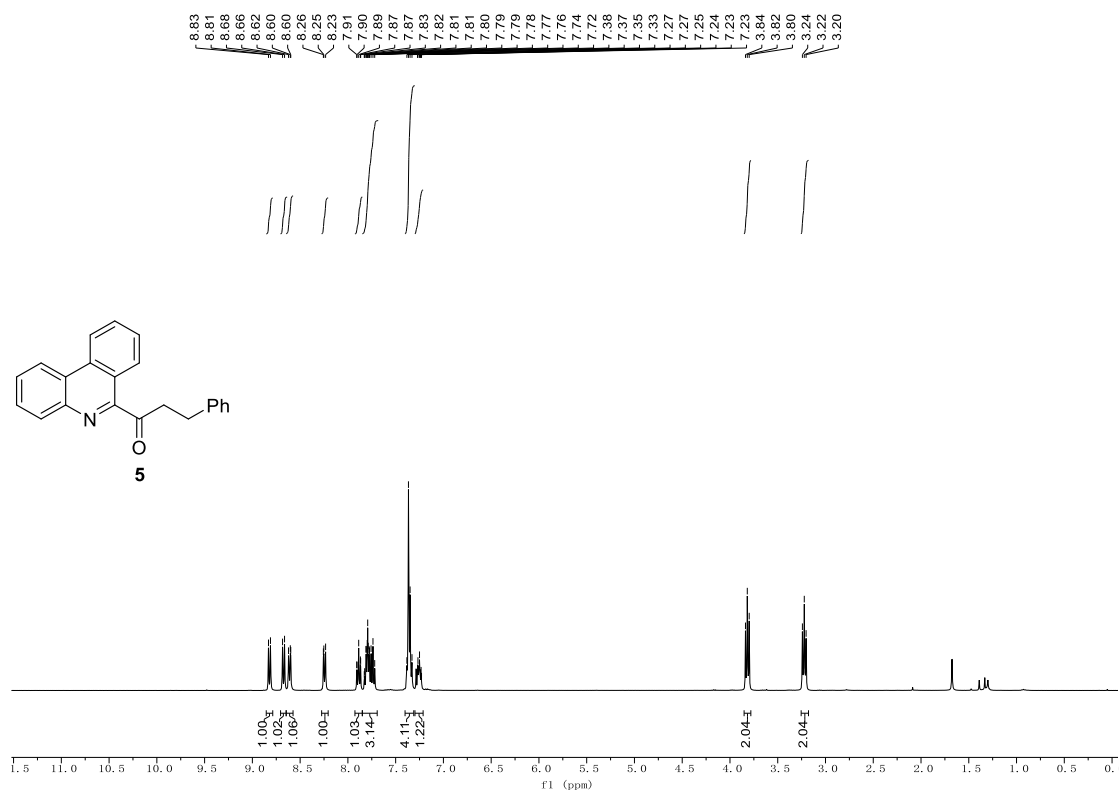

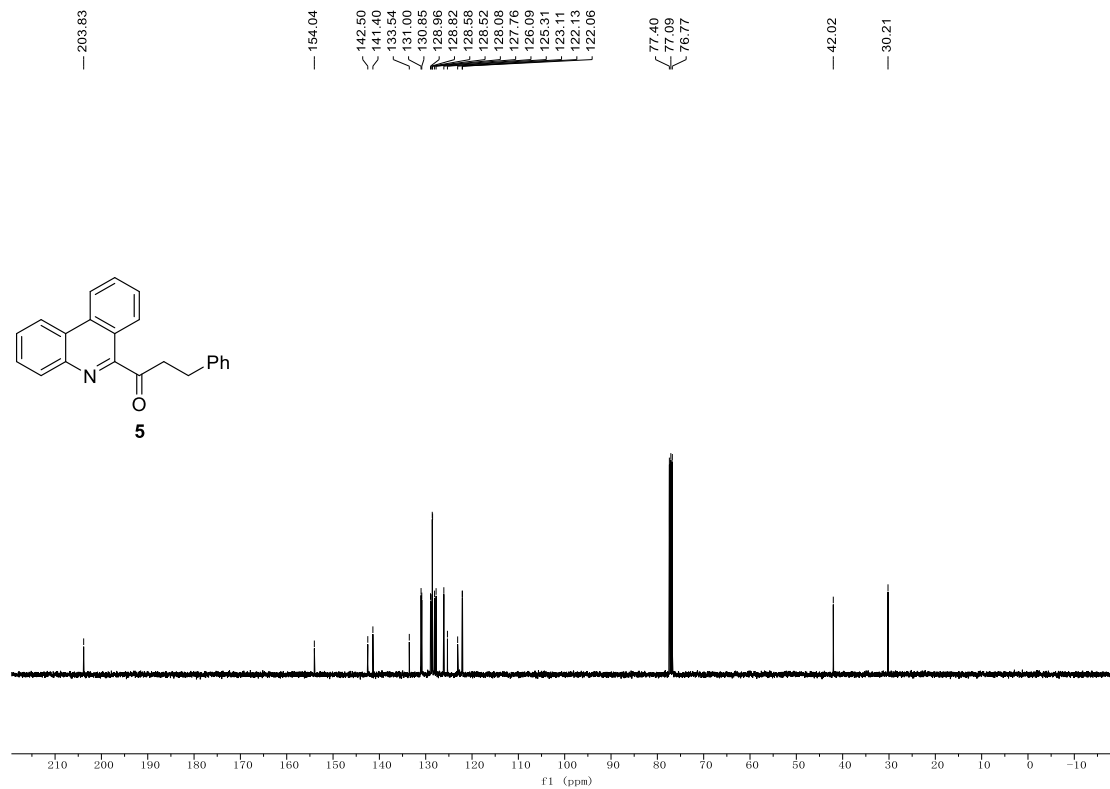

**<sup>1</sup>H NMR (400 MHz, CDCl<sub>3</sub>), <sup>13</sup>C NMR (100 MHz, CDCl<sub>3</sub>) spectra of product 6**

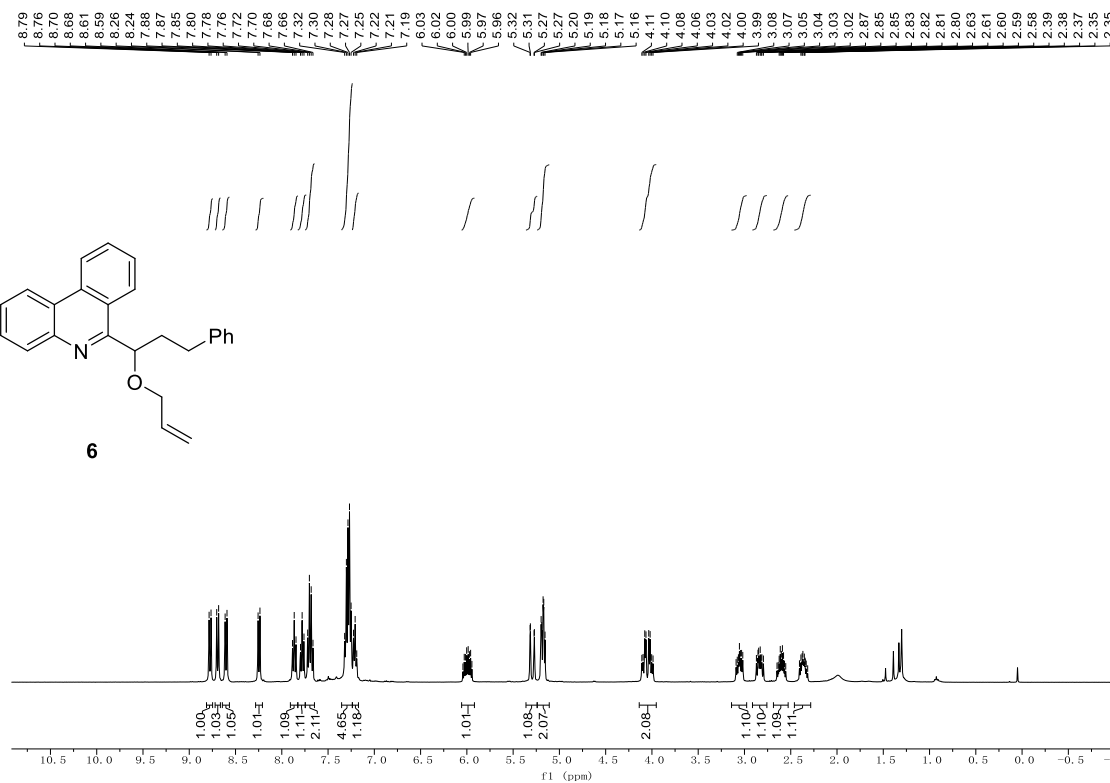

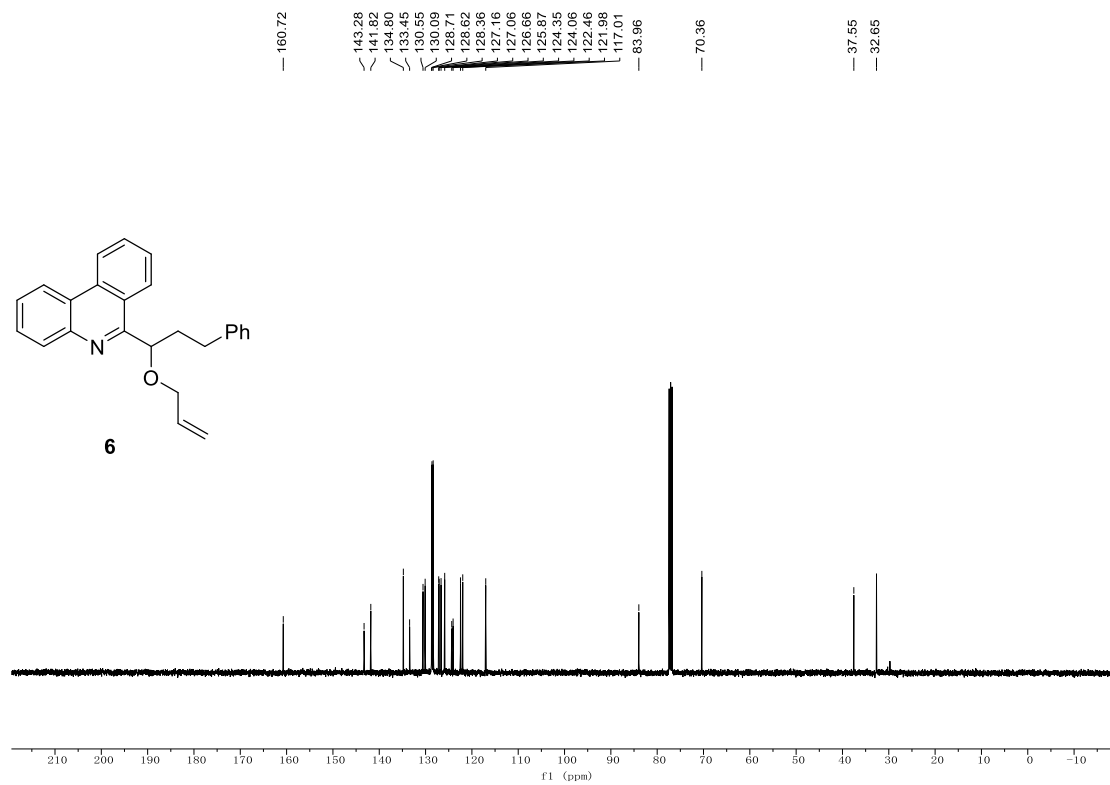

**<sup>1</sup>H NMR (400 MHz, CDCl<sub>3</sub>), <sup>13</sup>C NMR (100 MHz, CDCl<sub>3</sub>) spectra of product 7**

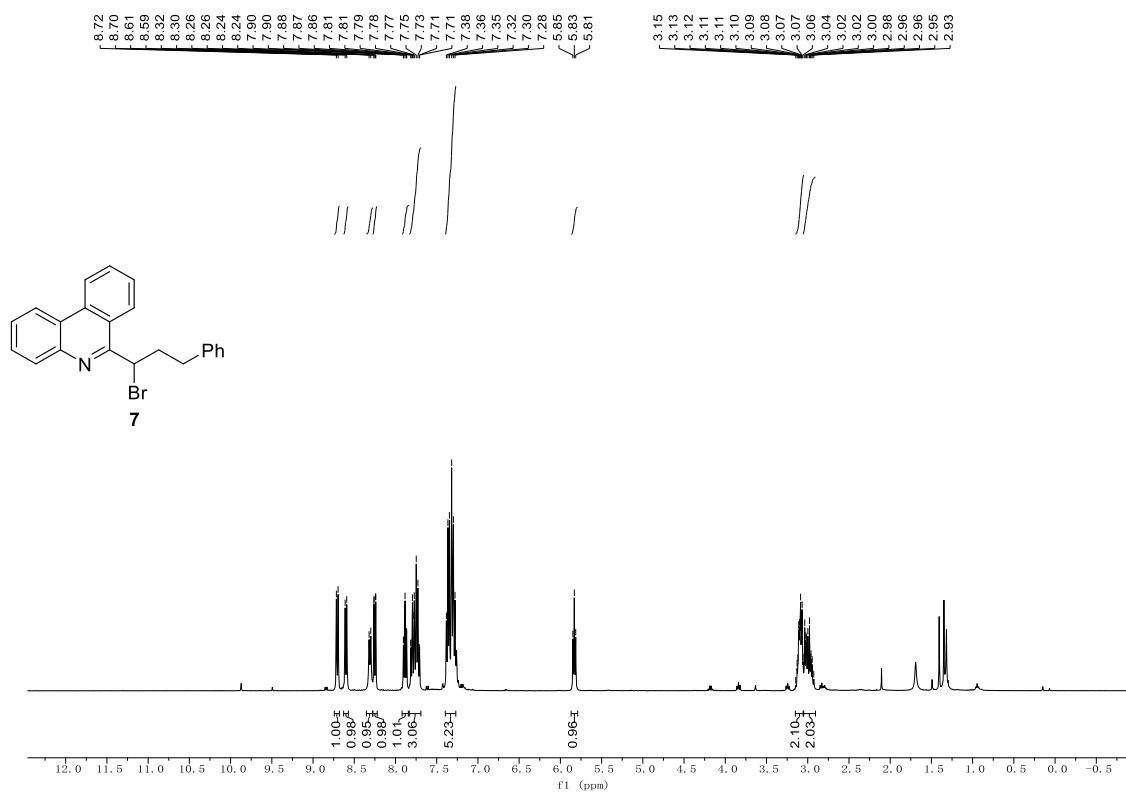

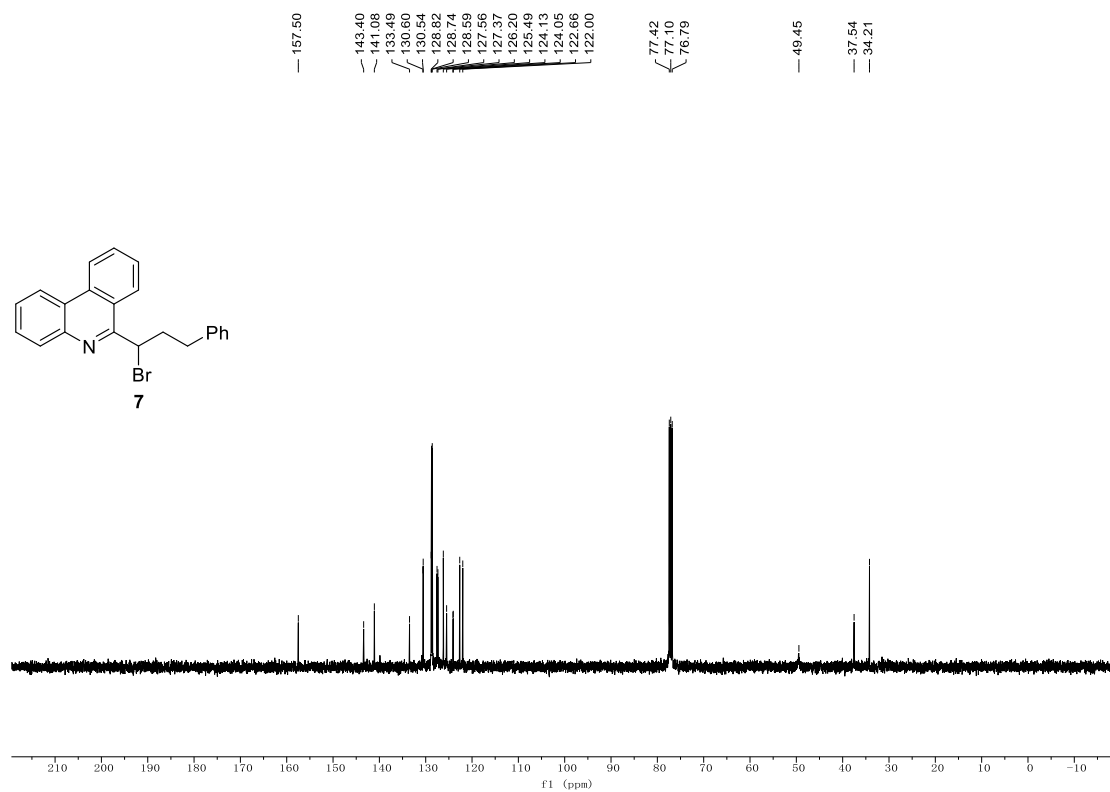

**<sup>1</sup>H NMR (400 MHz, CDCl<sub>3</sub>), <sup>13</sup>C NMR (100 MHz, CDCl<sub>3</sub>) spectra of product **8****

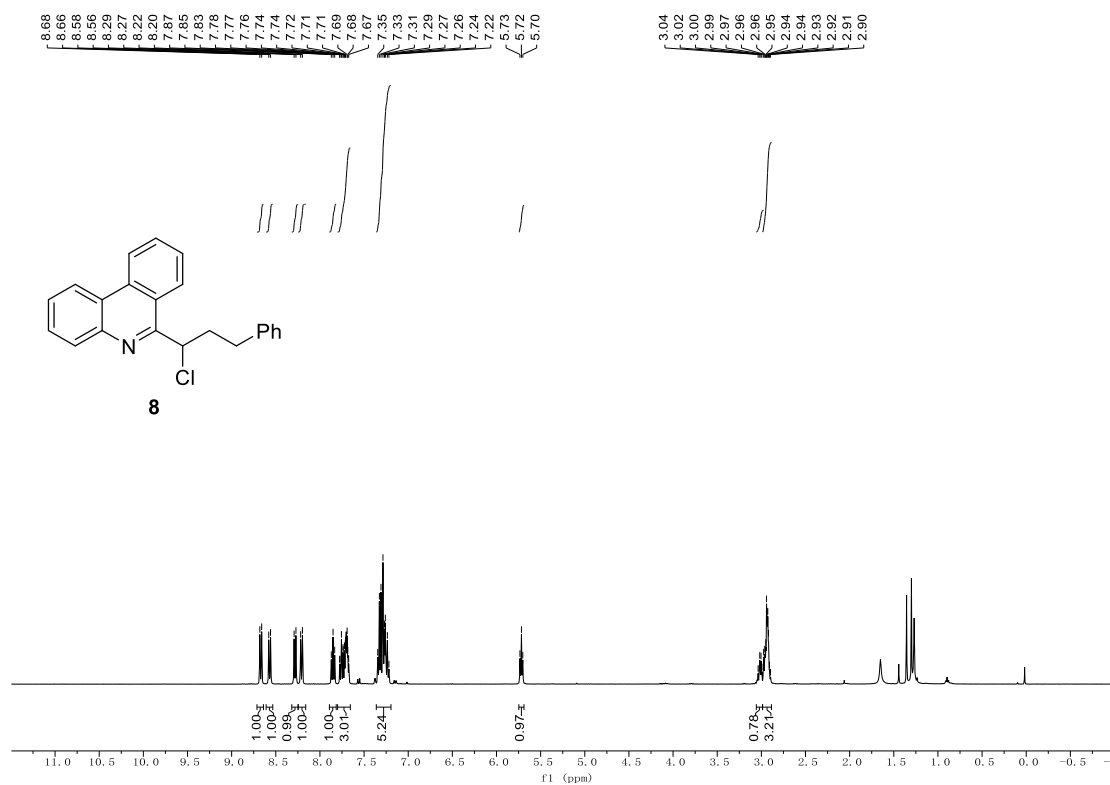

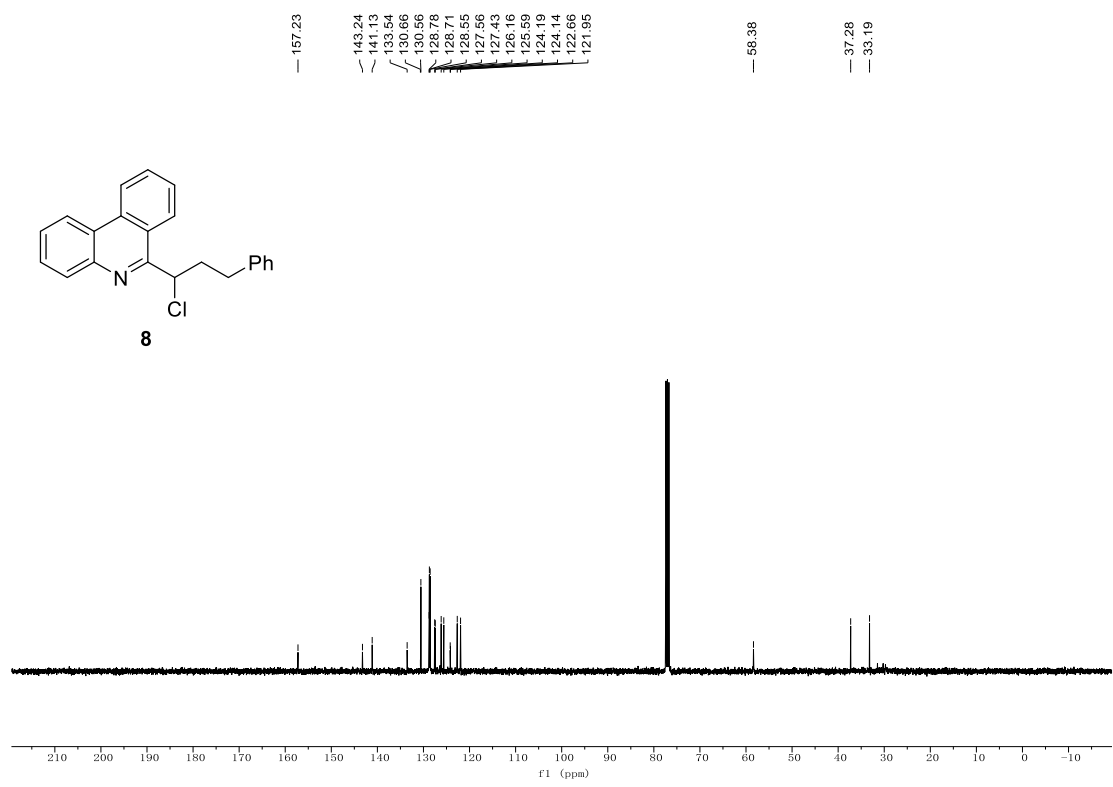

Supplement: d4ob02085e1.pdf [file d4ob02085e1.pdf]
